# Supplementary material for: Transcriptome Analysis of Antennal Chemosensory Genes in Curculio Dieckmanni Faust. (Coleoptera: Curculionidae)
Source: Frontiers journal article supplement (doi:10.3389/fphys.2022.896793), 2022-05-09
Supplement: Data_Sheet_1.PDF [file Data_Sheet_1.PDF]

## Supplementary Material

### Supplementary Figures

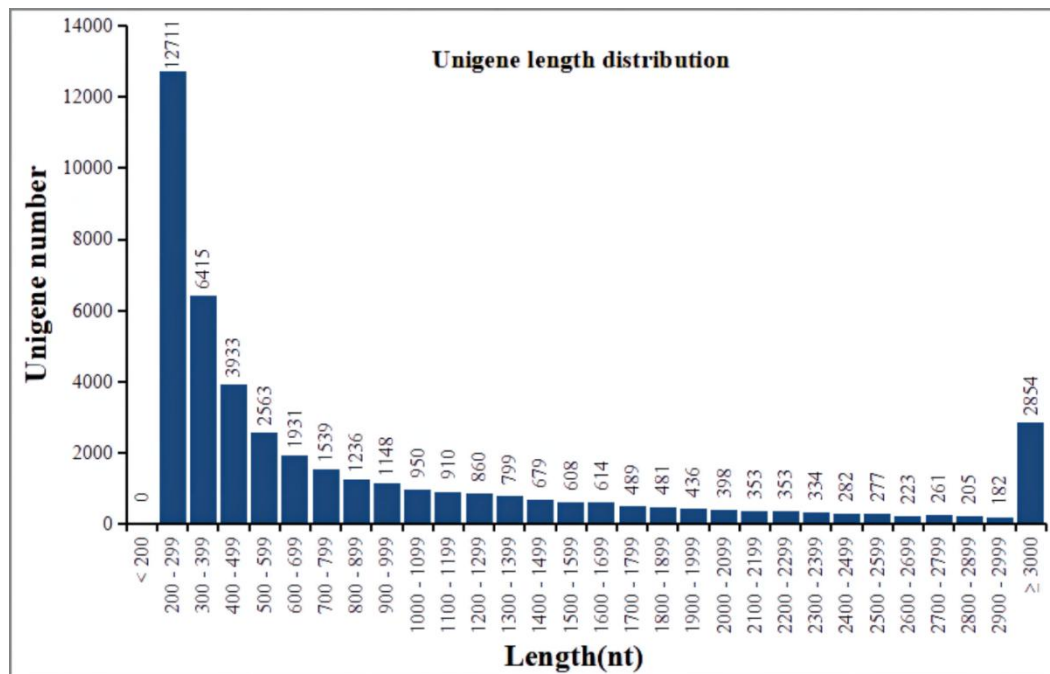

**Figure S1.** Length distribution of unigenes in *C. dieckmanni*. The histogram bars represent the numbers of unigenes in each length category.

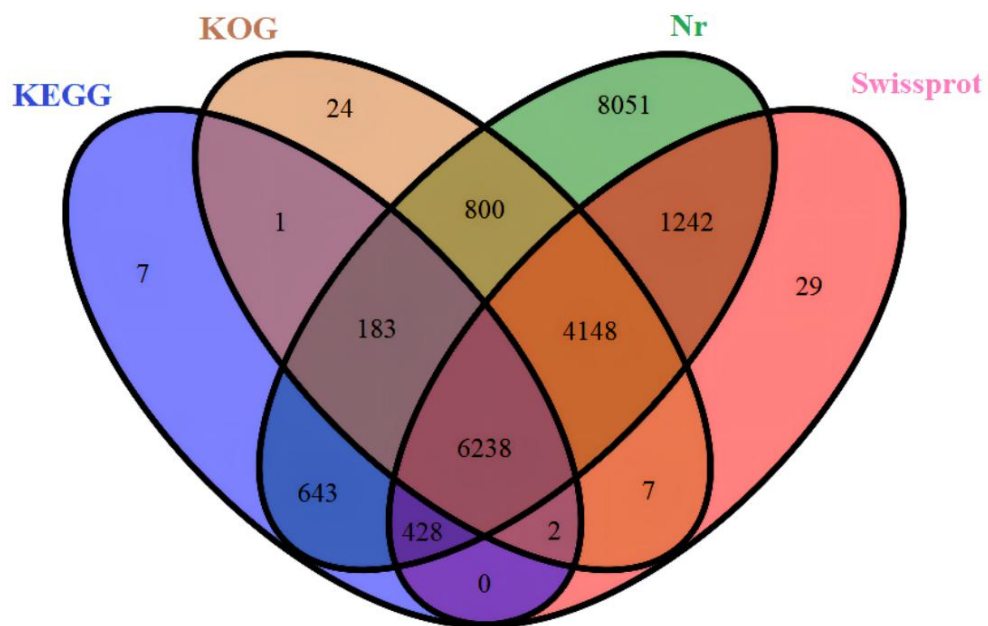

**Figure S2.** Venn diagrams of genes that were annotated in NR, Swiss-Port, KEGG and COG/KOG databases.

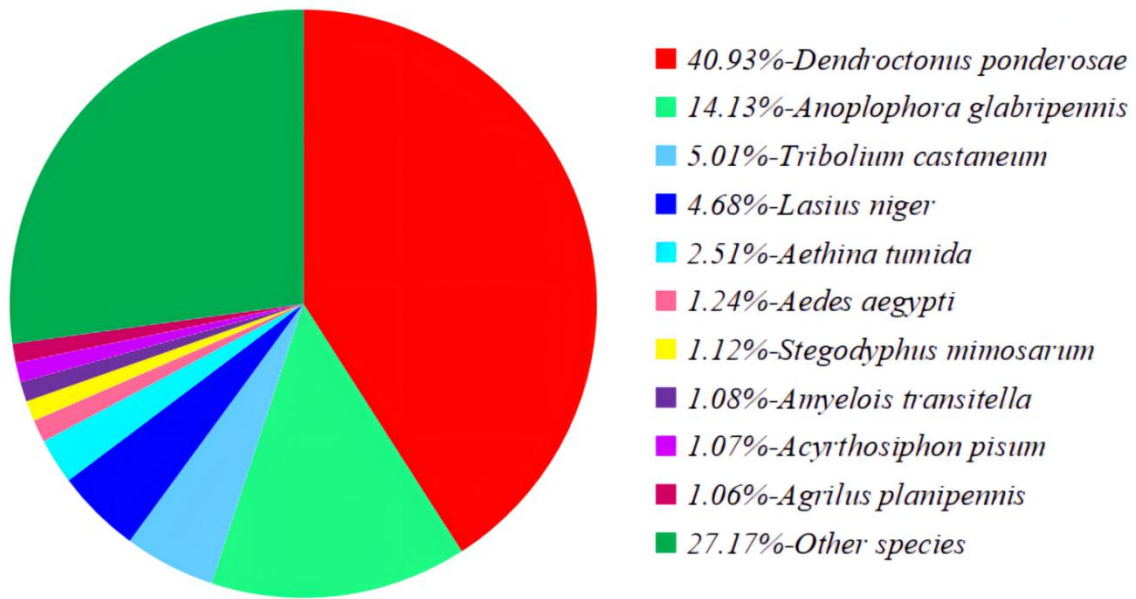

**Figure S3.** Species distribution of annotated genes in the Nr database.

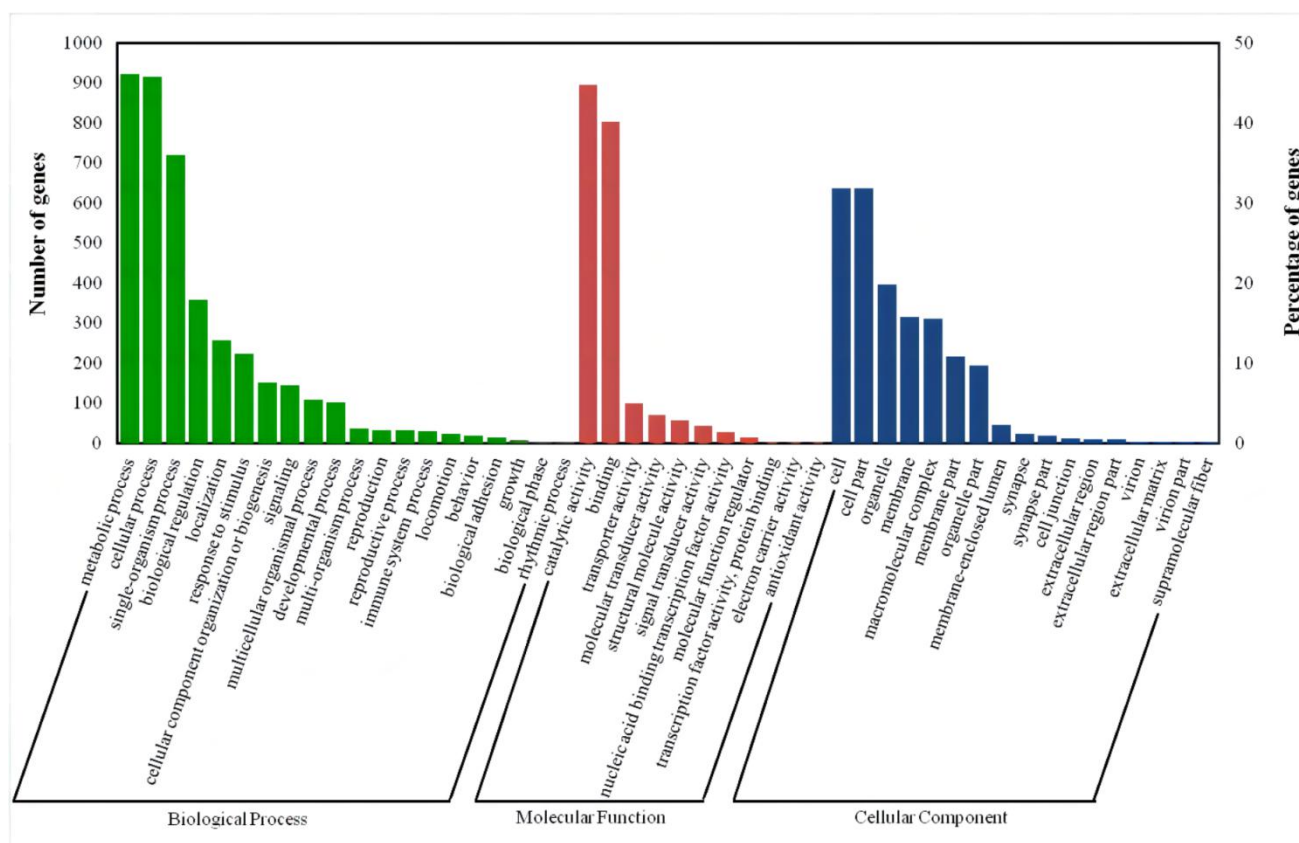

**Figure S4.** Gene Ontology (GO) classifications of *C. dieckmanni* unigenes.

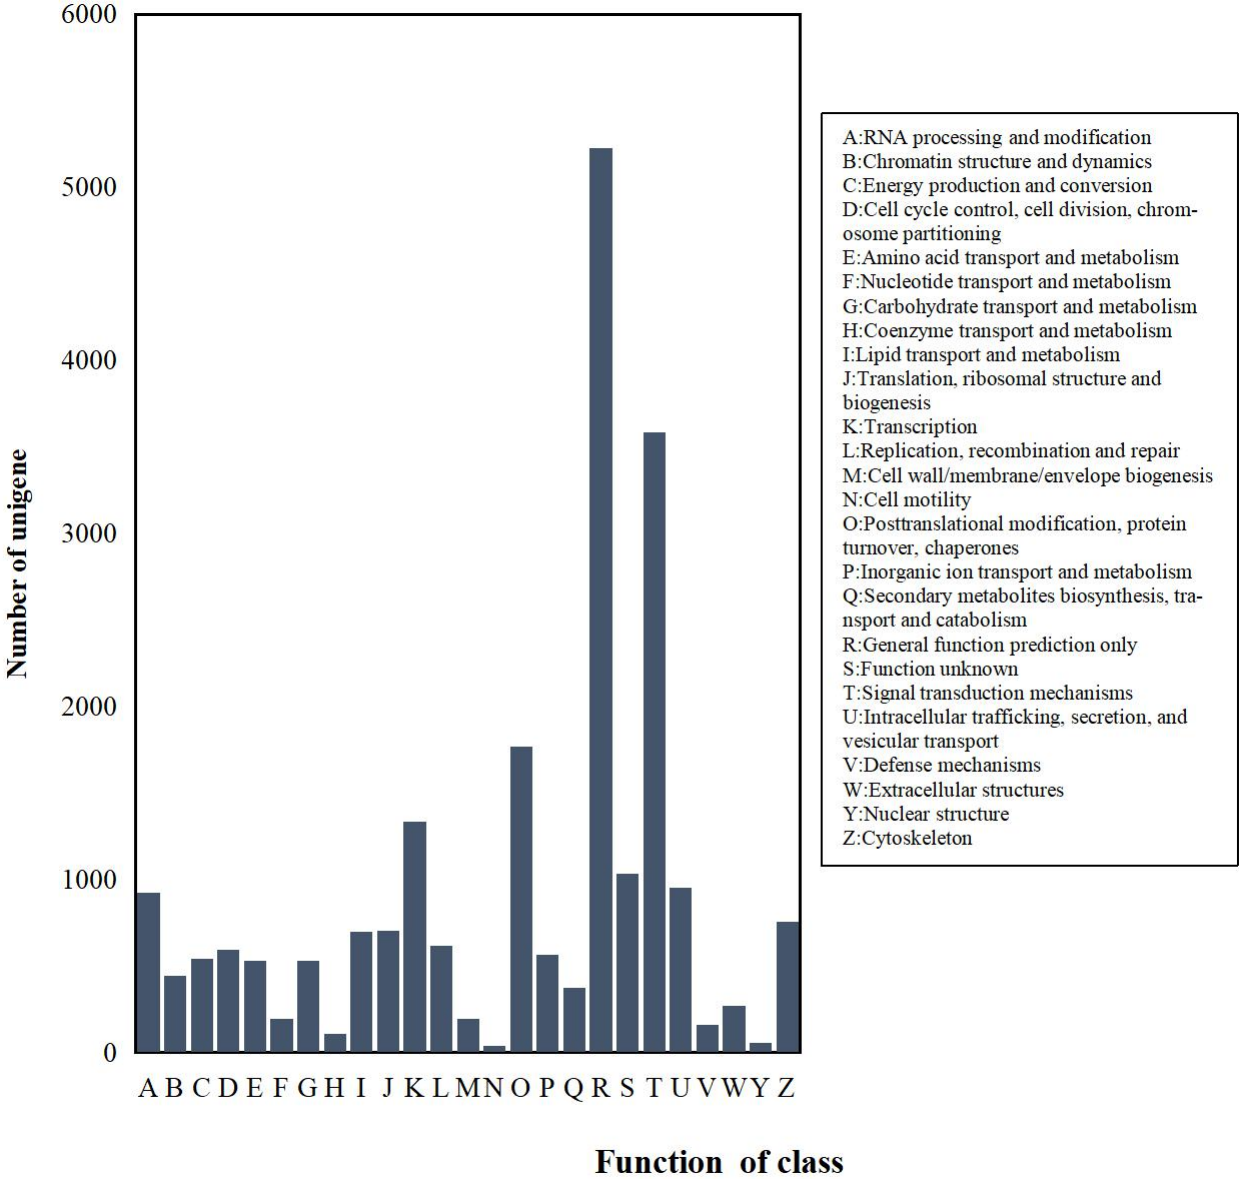

**Figure S5.** Karyotic Orthologous Groups classification of *C. dieckmanni* unigenes.
