# Supplementary material for: Transcriptome Analysis of Antennal Chemosensory Genes in Curculio Dieckmanni Faust. (Coleoptera: Curculionidae)
Source: Front Physiol. 2022 May 9;13:896793. doi: 10.3389/fphys.2022.896793 (PMC9124802; doi:10.3389/fphys.2022.896793)
Supplement: Supplementary file 2 [file Table2.XLSX]

## Sheet: Sheet1
Table S4 Differential expression analysis
GeneID	DM_rpkm	DF_rpkm	log2 Ratio(DF/DM)	Pvalue	FDR	Description
Unigene0000025	1.95693	0.388	-2.33447	9.1e-05	0.0167195	--
Unigene0000105	0.3165	1.68073	2.40881	5.14e-06	0.00170949	--
Unigene0000132	1.8156	0.001	-10.8262	0.000103285	0.0184477	--
Unigene0000198	12.9861	0.448767	-4.85486	1.19e-05	0.00338035	PREDICTED: mucin-2-like isoform X1 [Dendroctonus ponderosae]
Unigene0000421	3.88493	0.768933	-2.33696	1.19e-06	0.000493053	PREDICTED: uncharacterized protein LOC105449216 [Wasmannia auropunctata]
Unigene0000422	4.6343	1.35797	-1.7709	5.35e-05	0.0110247	peroxidase 12 [Lasius niger]
Unigene0000619	0.1094	1.23353	3.49511	6.54e-05	0.0128119	--
Unigene0000700	7.91233	1.38273	-2.51658	0.000109173	0.0190053	PREDICTED: integumentary mucin C.1-like isoform X1 [Dendroctonus ponderosae]
Unigene0000773	560.175	28.6696	-4.28828	2.31e-05	0.00566755	hypothetical antimicrobial peptide [Sitophilus zeamais]
Unigene0000926	1.1607	0.001	-10.1808	2.92e-05	0.00682979	Superoxide dismutase (Cu-Zn) 1, partial [Ceratitis capitata]
Unigene0001036	79.6076	2.77707	-4.84127	5.04e-06	0.00170949	PREDICTED: cecropin-A1-like [Dendroctonus ponderosae]
Unigene0001235	3.5057	0.1397	-4.6493	1.55e-09	1.33e-06	--
Unigene0001341	0.4478	1.698	1.92291	0.000169001	0.0258408	--
Unigene0003544	1.70167	0.025	-6.08888	7e-05	0.013668	histone cluster 1, H3g protein [Xenopus tropicalis]
Unigene0003587	1.899	0.335967	-2.49885	1.1e-05	0.00317802	PREDICTED: fibrous sheath CABYR-binding protein-like, partial [Dendroctonus ponderosae]
Unigene0004532	1.63013	0.001	-10.6708	0.000107695	0.018974	cyp-like protein, partial [Mytilus trossulus]
Unigene0004582	1.8342	0.001	-10.8409	7.74e-09	5.52e-06	--
Unigene0004689	18.2918	5.22193	-1.80854	0.000281734	0.0374964	--
Unigene0004872	30.7992	8.70897	-1.82232	5.06e-05	0.0105269	PREDICTED: O-acetyl-ADP-ribose deacetylase 1 [Drosophila busckii]
Unigene0005072	1.1351	0.001	-10.1486	0.00039887	0.049222	hypothetical protein D910_12336 [Dendroctonus ponderosae]
Unigene0005859	39.9694	4.18957	-3.25402	1.86e-08	1.21e-05	daphnid bacterial-ribosomal-RNA-like, possible HGT [Daphnia magna]
Unigene0005899	55.7729	2.80937	-4.31125	9.38e-09	6.59e-06	--
Unigene0005929	1.56123	0.001	-10.6085	0.00016922	0.0258408	hypothetical protein D910_08565 [Dendroctonus ponderosae]
Unigene0006111	3.21213	0.5343	-2.58781	0.000162331	0.02512	--
Unigene0006271	1.04883	0.001	-10.0346	0.000224738	0.0318593	--
Unigene0006319	1.06363	0.0385	-4.788	0.000378429	0.0477379	PREDICTED: RNA-directed DNA polymerase from mobile element jockey-like [Acyrthosiphon pisum]
Unigene0006414	7.2304	1.68913	-2.09779	1.01e-06	0.000426692	--
Unigene0006446	14.5539	0.0354	-8.68344	7.05e-23	4.39e-19	PREDICTED: uncharacterized protein LOC109546748 [Dendroctonus ponderosae]
Unigene0006569	64.982	12.3689	-2.39333	3.18e-07	0.000160856	unkown protein [Riptortus pedestris]
Unigene0006570	9.91007	1.84877	-2.42233	1.42e-05	0.00384298	--
Unigene0006573	53.2144	11.9862	-2.15045	5.13e-06	0.00170949	polyprotein [Ceratitis capitata]
Unigene0006574	13.0243	1.96883	-2.7258	1.1e-07	6.16e-05	hypothetical protein g.15935 [Pectinophora gossypiella]
Unigene0006575	44.363	8.3327	-2.4125	4.37e-06	0.0015334	unkown protein [Riptortus pedestris]
Unigene0006579	41.1367	12.1968	-1.75392	7.13e-05	0.0138469	polyprotein, partial [Ceratitis capitata]
Unigene0006581	30.4208	5.58507	-2.44541	6.57e-06	0.00204255	polyprotein, partial [Ceratitis capitata]
Unigene0006759	7.557	0.0161	-8.87461	9.66e-17	2.34e-13	PREDICTED: high mobility group B protein 3-like [Aethina tumida]
Unigene0006794	881.543	101.567	-3.1176	3.85e-05	0.00849657	PREDICTED: attacin-B-like [Dendroctonus ponderosae]
Unigene0006819	227.702	58.5721	-1.95886	3.12e-06	0.0011588	PREDICTED: gram-negative bacteria-binding protein 3-like [Anoplophora glabripennis]
Unigene0006848	0.259967	3.00147	3.52927	2.57e-08	1.65e-05	PREDICTED: neurofilament heavy polypeptide-like [Dendroctonus ponderosae]
Unigene0006849	2.18123	0.0407333	-5.74279	8.15e-05	0.0151653	senescence associated protein [Echinococcus multilocularis]
Unigene0006911	0.0880667	5.28973	5.90846	0.000215194	0.0309091	--
Unigene0006989	2.30217	0.0830333	-4.79316	7.47e-08	4.33e-05	--
Unigene0007008	1.48337	0.0255333	-5.86035	3.18e-07	0.000160856	PREDICTED: MORN repeat-containing protein 5 [Nicrophorus vespilloides]
Unigene0007233	14.2009	0.123367	-6.84689	1.29e-14	2.08e-11	--
Unigene0007264	2.43257	0.001	-11.2483	7.74e-11	8.21e-08	PREDICTED: hexokinase type 2-like [Dendroctonus ponderosae]
Unigene0007364	3.3067	0.171367	-4.27023	1.34e-08	8.95e-06	--
Unigene0007647	13.4516	4.4647	-1.59114	9.2e-05	0.0168264	PREDICTED: glutamic acid-rich protein-like isoform X1 [Aethina tumida]
Unigene0007819	6.36593	1.37003	-2.21616	0.000128123	0.0212064	hypothetical protein D910_07333 [Dendroctonus ponderosae]
Unigene0007866	1.34777	0.0247333	-5.76797	1.27e-05	0.00355677	PREDICTED: aldehyde dehydrogenase-like [Rhagoletis zephyria]
Unigene0007989	1.1967	0.2006	-2.57667	3.05e-05	0.00710177	PREDICTED: uncharacterized PE-PGRS family protein PE_PGRS54-like [Agrilus planipennis]
Unigene0008031	6.24573	0.400967	-3.96132	1.1e-10	1.11e-07	PREDICTED: cytosol aminopeptidase-like [Dendroctonus ponderosae]
Unigene0008038	4.74017	12.9936	1.45479	0.000208436	0.0302379	--
Unigene0008132	4.52397	16.5938	1.87498	8.37e-06	0.00251121	PREDICTED: pupal cuticle protein 36-like isoform X2 [Dendroctonus ponderosae]
Unigene0008183	2.4668	0.001	-11.2684	3.95e-09	3.13e-06	PREDICTED: neurofilament heavy polypeptide [Tribolium castaneum]
Unigene0008211	3.29037	0.0770667	-5.416	1.02e-08	6.94e-06	PREDICTED: C-type lectin 37Da-like [Dendroctonus ponderosae]
Unigene0008407	8.88003	1.50043	-2.56519	0.000275312	0.0368673	PREDICTED: fatty acid binding protein 1-B.1-like [Anoplophora glabripennis]
Unigene0008512	146.763	48.3992	-1.60043	0.000294595	0.0388517	PREDICTED: cathepsin B-like [Dendroctonus ponderosae]
Unigene0008589	2.36497	0.116733	-4.34053	6.18e-07	0.000286187	--
Unigene0008650	7.9499	21.4317	1.43074	0.000105946	0.0188198	e3 ubiquitin-protein ligase protein [Lasius niger]
Unigene0008714	7.5276	1.743	-2.11062	0.000264854	0.0359087	--
Unigene0008773	1.087	0.104733	-3.37556	0.000340614	0.0438576	--
Unigene0008833	6.21213	0.011	-9.14144	1.22e-18	3.8e-15	PREDICTED: uncharacterized protein LOC109539615 isoform X1 [Dendroctonus ponderosae]
Unigene0008845	1.30233	0.118067	-3.46343	1.52e-05	0.00406494	PREDICTED: UPF0605 protein CG18335-like [Dendroctonus ponderosae]
Unigene0009011	18.0628	0.3413	-5.72583	9.47e-15	1.65e-11	--
Unigene0009032	0.991967	4.4972	2.18066	4.33e-07	0.000209205	PREDICTED: DNA-directed RNA polymerase II subunit RPB1-like [Anoplophora glabripennis]
Unigene0009086	2.88823	0.119967	-4.58948	0.000164375	0.0252783	PREDICTED: C-type lectin 37Db-like [Dendroctonus ponderosae]
Unigene0009477	3.2312	0.001	-11.6579	4.62e-10	4.19e-07	--
Unigene0009504	1.55183	0.0589333	-4.71875	1.32e-06	0.000538667	--
Unigene0009620	3.11777	0.0498333	-5.96726	8.66e-08	4.89e-05	PREDICTED: 10 kDa heat shock protein, mitochondrial-like [Dendroctonus ponderosae]
Unigene0009631	1.4838	0.176367	-3.07265	0.000198057	0.0292191	--
Unigene0009664	368.217	108.011	-1.76938	9.89e-05	0.0178532	PREDICTED: peritrophin-1-like [Dendroctonus ponderosae]
Unigene0009853	21.9426	8.02913	-1.45042	0.000235953	0.0331255	PREDICTED: cathepsin L1-like [Dendroctonus ponderosae]
Unigene0009855	101.949	5.8954	-4.11212	6.24e-05	0.0125484	PREDICTED: holotricin-1 [Dendroctonus ponderosae]
Unigene0010535	1.4758	0.123733	-3.57619	0.000151956	0.0242245	60S ribosomal protein L13A [Lycosa singoriensis]
Unigene0010599	23.8714	4.4061	-2.43771	6.05e-06	0.00193582	--
Unigene0010613	0.7681	14.9257	4.28036	5.29e-16	1.15e-12	PREDICTED: bombyxin B-9-like [Dendroctonus ponderosae]
Unigene0011133	4.55653	0.001	-12.1537	5.11e-11	5.86e-08	--
Unigene0011199	1.60743	0.1375	-3.54726	0.000208164	0.0302379	PREDICTED: uncharacterized protein LOC109541260 isoform X1 [Dendroctonus ponderosae]
Unigene0011225	1.6413	0.189533	-3.11432	0.00039356	0.0489375	hypothetical protein D910_04607 [Dendroctonus ponderosae]
Unigene0011503	3.2206	11.7381	1.8658	1.99e-06	0.000785979	transposase-like protein [Lasius niger]
Unigene0011571	0.001	0.924767	9.85295	4.49e-05	0.00942968	--
Unigene0011657	1.23197	0.0311	-5.3079	5.13e-07	0.000242873	PREDICTED: spermine oxidase-like [Dendroctonus ponderosae]
Unigene0011658	0.935733	0.001	-9.86995	1.13e-06	0.000474298	PREDICTED: spermine oxidase-like [Dendroctonus ponderosae]
Unigene0012102	2.70293	0.0606333	-5.47827	6.34e-05	0.0126336	Retrovirus-related Pol polyprotein from type-2 retrotransposable element R2DM [Trichinella spiralis]
Unigene0012173	2.88713	0.0381333	-6.24244	4.76e-09	3.7e-06	hypothetical protein YQE_12867, partial [Dendroctonus ponderosae]
Unigene0012217	2.79343	0.0173333	-7.33235	0.000257383	0.0353362	PREDICTED: venom acid phosphatase Acph-1-like [Dendroctonus ponderosae]
Unigene0012243	19.9354	4.70923	-2.08177	0.000263454	0.0358306	PREDICTED: facilitated trehalose transporter Tret1-2 homolog [Dendroctonus ponderosae]
Unigene0012355	1.85663	0.067	-4.79238	7.31e-05	0.0140075	hypothetical protein YQE_12865, partial [Dendroctonus ponderosae]
Unigene0012531	1.6002	0.156633	-3.35279	3.78e-05	0.00842691	PREDICTED: serine protease HTRA2, mitochondrial-like [Anoplophora glabripennis]
Unigene0012587	7.6353	0.2949	-4.69439	1.59e-12	2.17e-09	--
Unigene0012722	3.45007	0.0227	-7.24779	2.34e-15	4.43e-12	hypothetical protein YQE_02289, partial [Dendroctonus ponderosae]
Unigene0012791	5.30303	0.0766333	-6.1127	0.000100121	0.0180056	PREDICTED: uncharacterized protein LOC109543327 [Dendroctonus ponderosae]
Unigene0012864	136.557	3.68413	-5.21203	1.71e-07	9.21e-05	PREDICTED: holotricin-1 [Dendroctonus ponderosae]
Unigene0012981	3.42397	0.001	-11.7415	2.94e-18	8.54e-15	PREDICTED: protein G12-like [Aethina tumida]
Unigene0013206	1.61603	0.192667	-3.06828	1.62e-05	0.00422158	PREDICTED: UPF0691 protein C9orf116 [Dendroctonus ponderosae]
Unigene0013313	0.977567	0.0655667	-3.89816	6.53e-05	0.0128119	PREDICTED: protein NEDD1-like [Agrilus planipennis]
Unigene0013472	13.5303	0.860933	-3.97415	6.47e-16	1.28e-12	PREDICTED: bombyxin B-9-like [Dendroctonus ponderosae]
Unigene0013542	5.33673	1.66043	-1.6844	0.000140439	0.0228916	--
Unigene0013771	0.982033	0.001	-9.93963	0.000202863	0.0296269	hypothetical protein YQE_12041, partial [Dendroctonus ponderosae]
Unigene0013772	0.977367	0.001	-9.93276	2.83e-05	0.0066532	hypothetical protein YQE_12041, partial [Dendroctonus ponderosae]
Unigene0014065	2.0644	0.0497667	-5.3744	1.42e-07	7.82e-05	PREDICTED: chymotrypsin BI-like [Dendroctonus ponderosae]
Unigene0014173	1.48103	0.001	-10.5324	3.19e-06	0.00117602	--
Unigene0014336	1.2652	0.0825667	-3.93766	0.00013045	0.021505	PREDICTED: uncharacterized PE-PGRS family protein PE_PGRS54-like [Agrilus planipennis]
Unigene0014461	19.578	0.4623	-5.40426	4.22e-05	0.00903754	PREDICTED: brachyurin-like [Dendroctonus ponderosae]
Unigene0014582	1.7264	0.001	-10.7536	0.000126587	0.0212064	--
Unigene0014626	1.3308	0.001	-10.3781	0.000119593	0.0204109	--
Unigene0014632	2.7681	0.0667333	-5.37434	7.2e-10	6.4e-07	PREDICTED: 15-hydroxyprostaglandin dehydrogenase [NAD(+)]-like [Dendroctonus ponderosae]
Unigene0014634	0.818367	3.26013	1.99411	0.000110987	0.0191677	PREDICTED: transcription factor MafA-like [Dendroctonus ponderosae]
Unigene0014643	1.3322	0.001	-10.3796	7.13e-06	0.00220102	hypothetical protein YQE_04377, partial [Dendroctonus ponderosae]
Unigene0014654	0.264967	1.21933	2.20221	0.000357759	0.0456599	PREDICTED: kinesin-like protein KIF19 [Dendroctonus ponderosae]
Unigene0014798	0.1093	1.39157	3.67034	0.000148632	0.0239294	--
Unigene0014854	1.53867	0.0490667	-4.97079	2.47e-09	2.07e-06	Glutamate dehydrogenase, mitochondrial [Anoplophora glabripennis]
Unigene0014898	2.94483	0.001	-11.524	2.4e-12	3.16e-09	PREDICTED: uncharacterized protein LOC109546522 [Dendroctonus ponderosae]
Unigene0014923	0.441133	2.46507	2.48234	2.73e-05	0.00650294	--
Unigene0015012	4.27217	0.314367	-3.76445	5.02e-12	6.43e-09	PREDICTED: GATA zinc finger domain-containing protein 14 isoform X1 [Microplitis demolitor]
Unigene0015044	2.20983	0.001	-11.1097	1.07e-05	0.00312996	--
Unigene0015089	1.5576	0.001	-10.6051	8.38e-10	7.29e-07	PREDICTED: hexokinase type 2-like [Dendroctonus ponderosae]
Unigene0015254	2.70957	17.1665	2.66346	6.59e-11	7.35e-08	PREDICTED: troponin C-like [Dendroctonus ponderosae]
Unigene0015494	1.0472	0.1315	-2.9934	0.000242104	0.0336632	PREDICTED: mitochondrial glutamate carrier 1-like [Dendroctonus ponderosae]
Unigene0015661	3.17453	8.07293	1.34655	0.00028105	0.0374964	AAEL010049-PA [Aedes aegypti]
Unigene0015698	1.5899	0.0137333	-6.85511	9.92e-14	1.49e-10	PREDICTED: kelch-like protein 10 [Dendroctonus ponderosae]
Unigene0015699	2.6448	0.0550667	-5.58584	1.01e-06	0.000426692	--
Unigene0015700	2.29083	0.0176333	-7.02142	2.17e-13	3.14e-10	PREDICTED: kelch-like protein 10 [Dendroctonus ponderosae]
Unigene0015710	4.25753	0.0253667	-7.39094	5.81e-07	0.000271775	--
Unigene0016161	1.4608	0.0678333	-4.42862	0.000261681	0.0357009	--
Unigene0016180	44.3121	17.4696	-1.34285	0.000268394	0.0361634	predicted protein, partial [Nematostella vectensis]
Unigene0016209	2.76577	0.965433	-1.51843	0.000240047	0.033592	PREDICTED: LOW QUALITY PROTEIN: leucine-rich repeat-containing protein 34-like [Dendroctonus ponderosae]
Unigene0016229	1.3733	0.001	-10.4234	3.1e-11	3.75e-08	PREDICTED: enolase-like [Dendroctonus ponderosae]
Unigene0016431	2.26657	0.421767	-2.42599	0.000392754	0.0489375	PREDICTED: macrophage mannose receptor 1-like [Anoplophora glabripennis]
Unigene0016479	206.401	46.7849	-2.14133	1.45e-05	0.00390137	PR-5-like protein [Diaprepes abbreviatus]
Unigene0016511	1.40977	0.001	-10.4612	0.00017378	0.0264443	PREDICTED: ubiquitin, partial [Solenopsis invicta]
Unigene0016527	1.99807	0.0996	-4.32632	0.000407354	0.0499394	GM13181 [Drosophila sechellia]
Unigene0016557	0.0827667	1.22803	3.89116	4.14e-05	0.00896189	--
Unigene0016608	0.4159	4.46867	3.42554	8.83e-06	0.00263325	PREDICTED: activating signal cointegrator 1 complex subunit 2 homolog [Dendroctonus ponderosae]
Unigene0016695	0.550567	2.50543	2.18607	4.25e-06	0.00150247	PREDICTED: pupal cuticle protein 20-like [Dendroctonus ponderosae]
Unigene0016726	6.97157	0.0695	-6.64833	8.33e-22	3.63e-18	PREDICTED: cytosol aminopeptidase-like [Dendroctonus ponderosae]
Unigene0016997	3.21557	0.651267	-2.30375	7.24e-05	0.0139388	PREDICTED: trypsin 3A1-like [Dendroctonus ponderosae]
Unigene0017020	1.97903	0.4245	-2.22096	5.88e-05	0.0120183	PREDICTED: mitochondrial 2-oxoglutarate/malate carrier protein-like [Dendroctonus ponderosae]
Unigene0017053	2.26993	0.330467	-2.78007	0.000181517	0.0271903	PREDICTED: uncharacterized protein LOC109543280 [Dendroctonus ponderosae]
Unigene0017076	7.69523	0.0116667	-9.36543	7.96e-14	1.24e-10	PREDICTED: neurofilament heavy polypeptide [Tribolium castaneum]
Unigene0017121	1.0251	0.001	-10.0015	0.000269818	0.036243	PREDICTED: facilitated trehalose transporter Tret1 isoform X1 [Tribolium castaneum]
Unigene0017122	2.0415	0.001	-10.9954	6.54e-07	0.000296415	PREDICTED: facilitated trehalose transporter Tret1-like isoform X1 [Anoplophora glabripennis]
Unigene0017219	2.75733	8.25033	1.58118	0.000230151	0.0324474	PREDICTED: pupal cuticle protein 20-like [Nicrophorus vespilloides]
Unigene0017273	5.04763	1.0827	-2.22097	2.21e-06	0.000851787	--
Unigene0017388	4.87477	0.001	-12.2511	7.9e-25	8.6e-21	PREDICTED: tubulin alpha-4 chain-like isoform X1 [Dendroctonus ponderosae]
Unigene0017660	1.3354	0.0785	-4.08844	0.000157449	0.0248273	40S ribosomal protein S27a [Acartia pacifica]
Unigene0017694	3.05163	0.001	-11.5754	4.55e-16	1.04e-12	PREDICTED: testicular haploid expressed gene protein [Megachile rotundata]
Unigene0017916	3.34673	0.130233	-4.68358	3.65e-06	0.0013237	cuticular protein analogous to peritrophins 1-A [Tribolium castaneum]
Unigene0017918	6.8887	0.874967	-2.97693	0.000223966	0.0318537	cuticular protein analogous to peritrophins 1-A [Tribolium castaneum]
Unigene0017931	15.3807	0.606867	-4.66359	1.35e-05	0.00371196	coleoptericin 1 [Sitophilus zeamais]
Unigene0017932	51.1598	2.1797	-4.55281	1.62e-05	0.00422158	coleoptericin 1 [Sitophilus zeamais]
Unigene0017933	184.936	16.4809	-3.48816	0.000386503	0.0484755	coleoptericin 1 [Sitophilus zeamais]
Unigene0018041	635.036	2222.76	1.80744	5.54e-08	3.35e-05	PREDICTED: troponin C-like isoform X2 [Dendroctonus ponderosae]
Unigene0018061	0.7558	4.01597	2.40967	2.29e-05	0.00566662	--
Unigene0018178	500.131	145.362	-1.78265	0.000405123	0.0498061	PREDICTED: serine proteinase stubble-like isoform X2 [Dendroctonus ponderosae]
Unigene0018187	1.12007	10.6305	3.24656	1.26e-14	2.08e-11	PREDICTED: tetra-peptide repeat homeobox protein 1-like [Dendroctonus ponderosae]
Unigene0018275	4.1477	0.0281	-7.2056	1.13e-22	6.16e-19	hypothetical protein D910_00213 [Dendroctonus ponderosae]
Unigene0018276	5.27433	155.314	4.88005	1.57e-23	1.37e-19	PREDICTED: threonine-rich protein-like isoform X1 [Anoplophora glabripennis]
Unigene0018362	17.278	1.81287	-3.25259	1.64e-06	0.000655646	PREDICTED: facilitated trehalose transporter Tret1-like isoform X1 [Dendroctonus ponderosae]
Unigene0018520	0.751767	2.1828	1.53782	0.000360087	0.0458227	--
Unigene0018551	7.5533	0.280267	-4.75224	6.14e-05	0.0124897	PREDICTED: DEAD-box ATP-dependent RNA helicase 28-like [Dendroctonus ponderosae]
Unigene0018585	1.6736	0.0997667	-4.06825	3.16e-07	0.000160856	PREDICTED: malate dehydrogenase, mitochondrial-like [Dendroctonus ponderosae]
Unigene0018599	1.5422	0.001	-10.5908	4.85e-09	3.7e-06	--
Unigene0018795	0.628	2.2334	1.83041	8.43e-05	0.0156109	PREDICTED: B-cell receptor CD22-like [Athalia rosae]
Unigene0019051	0.719367	2.26023	1.65167	0.000330485	0.0428683	--
Unigene0019122	0.445833	1.94207	2.12302	4.57e-05	0.00956392	--
Unigene0019134	0.001	0.8557	9.74096	5.66e-06	0.0018391	odorant receptor 21 [Eucryptorrhynchus brandti]
Unigene0019175	3.14847	0.0985333	-4.99789	4.18e-05	0.00900829	--
Unigene0019270	0.0448333	2.7376	5.9322	0.000323888	0.0423301	PREDICTED: tubulin alpha chain [Sinocyclocheilus grahami]
Unigene0019271	0.0407	1.73913	5.4172	0.0001584	0.0248576	alpha tubulin, partial [Choanoflagellida sp. SL163]
Unigene0019307	7.2354	1.3663	-2.4048	0.000201969	0.0296269	PREDICTED: serine protease snake-like [Anoplophora glabripennis]
Unigene0019448	1.16137	0.0721	-4.00968	3.88e-08	2.38e-05	PREDICTED: hexokinase type 2-like [Dendroctonus ponderosae]
Unigene0019530	1.23923	0.0625	-4.30945	0.000127435	0.0212064	transposase [Plasmodium yoelii yoelii 17XNL]
Unigene0019693	1.93237	0.128633	-3.90903	2.44e-06	0.000930765	PREDICTED: ADP,ATP carrier protein 2, mitochondrial [Rhinolophus sinicus]
Unigene0019882	4.5978	16.5634	1.84899	4.25e-05	0.00905963	hypothetical protein YQE_09923, partial [Dendroctonus ponderosae]
Unigene0019905	1.628	0.519567	-1.64772	0.00017575	0.0265584	PREDICTED: multidrug resistance-associated protein 4-like isoform X2 [Dendroctonus ponderosae]
Unigene0020414	0.542867	1.7737	1.70809	0.000399241	0.049222	--
Unigene0020427	10.4161	3.4541	-1.59243	0.000128151	0.0212064	--
Unigene0020960	9.04797	0.0317	-8.15697	2.97e-20	1.18e-16	PREDICTED: keratin-associated protein 16-1-like isoform X1 [Dendroctonus ponderosae]
Unigene0021055	52.2323	1.1332	-5.52647	3.74e-07	0.000182667	PREDICTED: collectin-10-like [Dendroctonus ponderosae]
Unigene0021152	7.5987	1278.06	7.39398	3.14e-25	4.56e-21	vitellogenin [Anthonomus grandis]
Unigene0021158	7.5587	26.0116	1.78295	3.08e-06	0.00115432	PREDICTED: short-chain dehydrogenase/reductase family 16C member 6 [Dendroctonus ponderosae]
Unigene0021305	14.8341	4.20603	-1.81839	0.000230377	0.0324474	PREDICTED: serine protease 7-like [Dendroctonus ponderosae]
Unigene0021402	4.13787	0.548567	-2.91515	2.25e-05	0.00566662	--
Unigene0022021	2.4509	0.320067	-2.93687	2.64e-05	0.00635727	translation elongation factor 1-alpha, partial [Bertiella ellipsoidea]
Unigene0022093	0.293767	1.22987	2.06576	0.000122536	0.0208315	--
Unigene0022140	42.0845	14.8328	-1.50449	0.000352206	0.0450834	PREDICTED: argininosuccinate synthase [Aethina tumida]
Unigene0022376	0.1807	1.1132	2.62304	7.99e-06	0.00241332	PREDICTED: structural maintenance of chromosomes protein 1A [Dendroctonus ponderosae]
Unigene0022513	4.25343	1.28313	-1.72896	0.000162529	0.02512	Otopetrin-2 [Melipona quadrifasciata]
Unigene0022654	2.444	0.0728333	-5.0685	1.66e-08	1.09e-05	--
Unigene0022713	318.376	67.7229	-2.23302	7.43e-06	0.00226068	PREDICTED: venom peptide isomerase heavy chain-like [Anoplophora glabripennis]
Unigene0022774	11.1986	3.23673	-1.79071	0.000114272	0.0196347	--
Unigene0022799	1.30293	3.41833	1.39153	0.000326544	0.0425495	PREDICTED: sulfotransferase 1C4 isoform X1 [Dendroctonus ponderosae]
Unigene0022929	11.6123	1.11193	-3.38451	4.63e-06	0.00159837	Ac1147-like protein, partial [Diaphorina citri]
Unigene0023389	0.784767	2.7817	1.82563	0.000212432	0.0306135	--
Unigene0023446	0.514533	1.9821	1.94569	0.000186726	0.0277355	--
Unigene0023506	7.31517	0.528667	-3.79046	2.21e-05	0.00558938	Protein TAR1 [Trichinella pseudospiralis]
Unigene0023631	3924.33	374.841	-3.3881	4.57e-06	0.00159281	PREDICTED: attacin-B-like [Dendroctonus ponderosae]
Unigene0023717	0.3839	1.3501	1.81426	0.00026688	0.036071	--
Unigene0023854	24.1773	4.19127	-2.52819	1.36e-05	0.00371196	PREDICTED: acidic mammalian chitinase-like [Dendroctonus ponderosae]
Unigene0023966	3.10293	0.0871333	-5.15426	1.62e-05	0.00422158	PREDICTED: aminopeptidase N-like [Dendroctonus ponderosae]
Unigene0023975	0.001	26.9196	14.7164	7.08e-09	5.22e-06	odorant-binding protein 14 [Dendroctonus armandi]
Unigene0024339	0.852267	2.55423	1.58351	0.000351824	0.0450834	--
Unigene0024515	1.9874	0.001	-10.9567	3.46e-08	2.15e-05	PREDICTED: uncharacterized protein LOC109539616 [Dendroctonus ponderosae]
Unigene0024583	6.4831	0.466567	-3.79653	0.000365381	0.0462261	--
Unigene0024862	9.49113	2.728	-1.79874	0.000249778	0.0345099	PREDICTED: platelet glycoprotein V-like [Aethina tumida]
Unigene0025001	10.76	28.16	1.38796	0.000124209	0.0210339	PREDICTED: cysteine sulfinic acid decarboxylase-like [Dendroctonus ponderosae]
Unigene0025141	3604.81	2008.08	-0.844103	0.0201682	0.429626	PREDICTED: vitellogenin-like [Dendroctonus ponderosae]
Unigene0025326	1.62297	0.001	-10.6644	5.38e-06	0.00176014	--
Unigene0026380	60.1325	20.0681	-1.58324	0.000379726	0.0477631	PREDICTED: serine protease easter-like isoform X1 [Tribolium castaneum]
Unigene0026428	7.8764	0.001	-12.9433	3.42e-15	6.2e-12	--
Unigene0026519	0.001	1.44133	10.4932	2.28e-05	0.00566662	PREDICTED: luciferin 4-monooxygenase-like [Dendroctonus ponderosae]
Unigene0026814	0.911533	3.1148	1.77277	0.000181806	0.0271903	--
Unigene0027112	124.158	565.564	2.18751	6.24e-05	0.0125484	--
Unigene0027313	1435.73	3280.35	1.19206	0.000392004	0.0489375	PREDICTED: arrestin homolog [Dendroctonus ponderosae]
Unigene0027547	0.594667	2.34617	1.98015	0.000110538	0.0191662	hypothetical protein ALC57_15604 [Trachymyrmex cornetzi]
Unigene0027608	0.001	26.9196	14.7164	7.08e-09	5.22e-06	--
Unigene0027933	10.1225	0.001	-13.3053	4.46e-23	3.24e-19	--
Unigene0027946	1.10153	0.001	-10.1053	0.000246953	0.0342281	PREDICTED: carbonic anhydrase 13-like [Dendroctonus ponderosae]
Unigene0028231	1.7568	0.001	-10.7787	4.13e-06	0.00147368	--
Unigene0028824	0.272067	64.7145	7.89398	7.29e-22	3.52e-18	Odorant binding protein 10 [Anthonomus grandis]
Unigene0028871	269.156	40.3734	-2.73696	5.21e-06	0.0017177	PR-5-like protein [Diaprepes abbreviatus]
Unigene0028996	100.589	16.3214	-2.62363	7.26e-06	0.00222454	glutathione S-transeferase [Dendroctonus armandi]
Unigene0029068	9.42527	1.232	-2.93553	7.51e-05	0.014334	--
Unigene0029383	511.57	197.112	-1.37592	0.000284495	0.0377484	PREDICTED: apolipoprotein D-like [Dendroctonus ponderosae]
Unigene0029554	0.8373	0.001	-9.7096	0.0001383	0.0226276	--
Unigene0029555	1.41987	0.0976333	-3.86224	9.76e-05	0.0176939	hypothetical protein g.517, partial [Clastoptera arizonana]
Unigene0029683	0.740833	0.001	-9.53301	0.000114593	0.0196347	PREDICTED: mitochondrial pyruvate carrier 1 [Tribolium castaneum]
Unigene0030122	1.3651	0.001	-10.4148	2.39e-05	0.00581901	mFLJ00348 protein, partial [Mus musculus]
Unigene0030127	1.14587	0.001	-10.1622	9.78e-06	0.00289678	--
Unigene0030301	0.494867	2.56653	2.37471	8.01e-05	0.0149538	--
Unigene0030652	0.527267	2.12147	2.00846	0.00018134	0.0271903	--
Unigene0030703	0.9286	5.58877	2.5894	8.04e-08	4.6e-05	--
Unigene0030763	16.3453	0.691633	-4.56273	7.31e-09	5.3e-06	daphnid bacterial-ribosomal-RNA-like, possible HGT, partial [Daphnia magna]
Unigene0030764	48.2832	1.8875	-4.67697	6.1e-09	4.58e-06	daphnid bacterial-ribosomal-RNA-like, possible HGT, partial [Daphnia magna]
Unigene0030766	11.0537	3.07403	-1.84632	3.87e-05	0.00849657	daphnid bacterial-ribosomal-RNA-like, possible HGT [Daphnia magna]
Unigene0030769	111.099	21.3635	-2.37863	2.96e-09	2.43e-06	hypothetical protein, partial [Daphnia magna]
Unigene0031829	112.071	29.8737	-1.90746	8.89e-05	0.0163991	PREDICTED: kynurenine/alpha-aminoadipate aminotransferase, mitochondrial [Dendroctonus ponderosae]
Unigene0032030	1.05503	0.001	-10.0431	0.000221061	0.0315654	Regulator of rDNA transcription protein 15 [Trichinella papuae]
Unigene0032033	10.4022	0.699567	-3.89428	6.32e-07	0.000289528	Regulator of rDNA transcription protein 15 [Trichinella papuae]
Unigene0033244	1.5831	0.0828333	-4.2564	9.84e-09	6.8e-06	--
Unigene0033437	1.4747	0.001	-10.5262	5.99e-06	0.00193237	--
Unigene0034646	1.3264	0.001	-10.3733	5.03e-07	0.00024071	hypothetical protein YQE_07656, partial [Dendroctonus ponderosae]
Unigene0034736	0.0597	0.7909	3.72769	0.000107301	0.018974	hypothetical protein D910_09780 [Dendroctonus ponderosae]
Unigene0034771	0.001	0.8557	9.74096	5.66e-06	0.0018391	--
Unigene0034774	3.89813	0.0496	-6.2963	8.83e-17	2.26e-13	PREDICTED: tubulin beta chain [Dendroctonus ponderosae]
Unigene0034784	1.2232	0.158133	-2.95145	7.24e-05	0.0139388	PREDICTED: uncharacterized protein LOC109545035 [Dendroctonus ponderosae]
Unigene0034981	5.65397	0.001	-12.465	1.32e-05	0.00369584	PREDICTED: C-type lectin 37Da-like [Dendroctonus ponderosae]
Unigene0035064	20.5225	0.0490667	-8.70825	3.23e-05	0.00743889	trypsin precursor [Diaprepes abbreviatus]
Unigene0035102	1.37717	0.001	-10.4275	3.9e-06	0.00140302	--
Unigene0035168	0.0328667	1.61967	5.62293	3.8e-05	0.00842691	--
Unigene0035215	1.3038	0.001	-10.3485	4.87e-06	0.00166983	hypothetical protein YQE_08340, partial [Dendroctonus ponderosae]
Unigene0035231	1.22227	0.062	-4.30115	6.86e-07	0.000307621	PREDICTED: vasodilator-stimulated phosphoprotein-like [Anoplophora glabripennis]
Unigene0035293	2.24697	0.0313333	-6.16414	4.39e-11	5.16e-08	PREDICTED: histone H1A, sperm-like [Dendroctonus ponderosae]
Unigene0035369	1.4247	0.001	-10.4764	3.42e-05	0.00774166	--
Unigene0035399	2.8628	0.001	-11.4832	1.23e-06	0.000505391	cyp-like protein, partial [Mytilus trossulus]
Unigene0035506	0.889167	0.001	-9.79631	0.000362541	0.0460004	Transposable element Tcb1 transposase [Anoplophora glabripennis]
Unigene0035705	1.5093	0.0306333	-5.62263	2.12e-06	0.000823693	hypothetical protein D910_06968 [Dendroctonus ponderosae]
Unigene0035785	67.8394	13.3016	-2.35053	3.13e-08	1.97e-05	daphnid bacterial-ribosomal-RNA-like, possible HGT, partial [Daphnia magna]
Unigene0035787	27.5325	9.7758	-1.49385	0.00021133	0.0305558	PREDICTED: probable salivary secreted peptide, partial [Agrilus planipennis]
Unigene0035826	1.1301	0.001	-10.1422	0.000286666	0.037921	--
Unigene0035876	1.54023	0.001	-10.5889	0.000149005	0.0239294	hypothetical protein D910_00548 [Dendroctonus ponderosae]
Unigene0035911	1.09843	0.001	-10.1012	2.32e-05	0.00566755	--
Unigene0036092	0.7895	0.001	-9.6248	0.000149592	0.0239352	heat shock protein [Lissorhoptrus oryzophilus]
Unigene0036112	1.13403	0.001	-10.1472	8.16e-07	0.000362265	hypothetical protein YQE_01936, partial [Dendroctonus ponderosae]
Unigene0036552	217.728	14.4308	-3.9153	2.12e-05	0.00543311	coleoptericin 1 [Sitophilus zeamais]
Unigene0036641	1.27297	0.0889	-3.83987	1.2e-05	0.00338035	inorganic phosphate cotransporter-like protein [Lasius niger]
Unigene0036747	0.183667	1.442	2.97291	2.69e-05	0.0064301	--
Unigene0036762	1.39423	0.121667	-3.51847	1.35e-05	0.00371196	--
Unigene0036859	1.66193	0.124733	-3.73594	2.76e-05	0.00653737	PREDICTED: uncharacterized protein LOC109546384 isoform X2 [Dendroctonus ponderosae]
Unigene0036901	0.0203333	0.6939	5.09281	6.36e-05	0.0126336	PREDICTED: radial spoke head 10 homolog B-like [Aethina tumida]
Unigene0036990	1.83833	0.001	-10.8442	2.23e-07	0.000118174	--
Unigene0037005	0.986733	0.001	-9.94652	1.14e-05	0.00329136	--
Unigene0037008	1.99123	0.001	-10.9594	2.06e-06	0.000808844	PREDICTED: cytochrome c, testis-specific-like [Dendroctonus ponderosae]
Unigene0037047	2.7969	0.006	-8.86465	6.99e-18	1.9e-14	PREDICTED: facilitated trehalose transporter Tret1-like [Dendroctonus ponderosae]
Unigene0037152	0.119133	1.05753	3.15005	6.26e-05	0.0125484	--
Unigene0037470	0.7649	0.001	-9.57913	0.000221214	0.0315654	PREDICTED: uncharacterized protein LOC109540568 [Dendroctonus ponderosae]
Unigene0037594	1.3066	0.0325667	-5.32628	3.16e-05	0.00731765	PREDICTED: phospholipase A1 3-like [Anoplophora glabripennis]
Unigene0037620	110.444	31.5441	-1.80787	8.61e-07	0.000374687	PREDICTED: glycine N-methyltransferase [Dendroctonus ponderosae]
Unigene0037632	3.48967	0.001	-11.7689	0.000108377	0.018974	PREDICTED: pancreatic triacylglycerol lipase-like [Dendroctonus ponderosae]
Unigene0037661	20.7196	0.0753	-8.10413	4.8e-19	1.61e-15	PREDICTED: protamine-like [Dendroctonus ponderosae]
Unigene0037662	0.9414	0.001	-9.87866	0.000108557	0.018974	indoleamine 2,3-dioxygenase family protein [Tetrahymena thermophila SB210]
Unigene0037769	1.0799	0.001	-10.0767	3e-06	0.00113597	PREDICTED: testis-specific serine/threonine-protein kinase 3 [Dendroctonus ponderosae]
Unigene0037852	1.35577	0.001	-10.4049	1.45e-07	7.88e-05	PREDICTED: uncharacterized protein LOC109540256 [Dendroctonus ponderosae]
Unigene0037872	104.004	0.236433	-8.78099	5.15e-06	0.00170949	hypothetical protein D910_07393 [Dendroctonus ponderosae]
Unigene0037877	1.121	0.001	-10.1306	1.19e-05	0.00338035	PREDICTED: uncharacterized protein LOC108917140 [Anoplophora glabripennis]
Unigene0037966	1.11547	0.001	-10.1234	3.65e-05	0.0081889	--
Unigene0038067	0.7632	0.0268333	-4.82996	0.000160124	0.0249777	PREDICTED: sialin-like [Dendroctonus ponderosae]
Unigene0038088	12.3848	0.0622333	-7.63666	6.16e-16	1.28e-12	--
Unigene0038128	1.05103	0.001	-10.0376	3.32e-05	0.00757248	fructose-bisphosphate aldolase class II, partial [Gregarina niphandrodes]
Unigene0038146	1.00933	0.0598667	-4.07551	0.000252032	0.0347111	PREDICTED: uncharacterized protein LOC109546792 [Dendroctonus ponderosae]
Unigene0038157	0.936533	0.001	-9.87119	0.00039898	0.049222	hypothetical protein D910_11664 [Dendroctonus ponderosae]
Unigene0038303	1.02957	0.001	-10.0078	2.51e-05	0.00607115	hypothetical protein D910_05864 [Dendroctonus ponderosae]
Unigene0038432	1.57223	0.415367	-1.92036	0.000241434	0.0336632	PREDICTED: acetylcholine receptor subunit alpha-like [Dendroctonus ponderosae]
Unigene0038485	0.1935	1.33957	2.79136	3.6e-05	0.00811891	--
Unigene0038679	0.2973	1.37877	2.21339	7.87e-05	0.0149492	--
Unigene0038783	1.79647	0.001	-10.8109	1.69e-05	0.00435749	--
Unigene0039015	8.0496	0.0431333	-7.54397	1.53e-28	6.65e-24	PREDICTED: tubulin alpha-1 chain [Agrilus planipennis]
Unigene0039167	1.42807	0.001	-10.4798	6.48e-05	0.0128102	daphnid bacterial-ribosomal-RNA-like, possible HGT [Daphnia magna]
Unigene0039177	1.3042	0.001	-10.3489	6.54e-08	3.9e-05	PREDICTED: uncharacterized protein LOC109542704 isoform X2 [Dendroctonus ponderosae]
Unigene0039369	1.119	0.0236333	-5.56524	5.46e-05	0.0112111	--
Unigene0039410	4.7729	0.0658667	-6.17917	0.00015578	0.0247434	RE24790p [Daphnia magna]
Unigene0039621	0.0463	1.41147	4.93004	0.000127559	0.0212064	--
Unigene0039644	1.063	0.001	-10.0539	3.64e-07	0.00018023	PREDICTED: FERM domain-containing protein 5-like [Dendroctonus ponderosae]
Unigene0039831	1.00457	0.001	-9.97236	6.55e-06	0.00204255	PREDICTED: stabilizer of axonemal microtubules 2-like [Anoplophora glabripennis]
Unigene0039852	0.675333	0.0228333	-4.88639	0.000103427	0.0184477	PREDICTED: uncharacterized protein LOC109541908 [Dendroctonus ponderosae]
Unigene0039955	14.387	0.001	-13.8125	1.01e-19	3.68e-16	--
Unigene0040190	0.922167	0.001	-9.84888	0.000125398	0.0211529	hypothetical protein g.44654, partial [Clastoptera arizonana]
Unigene0040327	2.50493	0.1257	-4.31672	1.64e-05	0.00424623	PREDICTED: integumentary mucin C.1-like isoform X3 [Dendroctonus ponderosae]
Unigene0040429	1.01603	0.001	-9.98873	0.000142983	0.0232192	PREDICTED: intracellular protein transport protein USO1-like [Dendroctonus ponderosae]
Unigene0040596	3.52453	0.140167	-4.65222	3.29e-10	3.16e-07	PREDICTED: keratin-associated protein 10-7-like [Agrilus planipennis]
Unigene0040606	1.25227	0.3287	-1.9297	0.000333716	0.0430969	Transposable element Tc3 transposase [Anoplophora glabripennis]
Unigene0040738	1.30923	0.001	-10.3545	3.86e-09	3.11e-06	PREDICTED: tubulin alpha-1 chain-like [Dendroctonus ponderosae]
Unigene0040861	1.15977	0.001	-10.1796	7.99e-05	0.0149538	--
Unigene0041068	0.938833	0.001	-9.87473	3.27e-07	0.000163439	PREDICTED: uncharacterized protein LOC109541905 isoform X2 [Dendroctonus ponderosae]
Unigene0041119	1.93637	0.1116	-4.11694	3.07e-07	0.000160856	PREDICTED: parkin coregulated gene protein homolog [Dendroctonus ponderosae]
Unigene0041181	1.7992	0.0814333	-4.46559	0.000186228	0.0277355	PREDICTED: aminopeptidase N-like [Dendroctonus ponderosae]
Unigene0041205	1.68637	0.0255	-6.04728	0.000144813	0.023429	PREDICTED: formate dehydrogenase, chloroplastic/mitochondrial [Rhinolophus sinicus]
Unigene0041207	0.925633	0.001	-9.8543	0.000202651	0.0296269	hypothetical protein YQE_12480, partial [Dendroctonus ponderosae]
Unigene0041208	0.937633	0.001	-9.87288	6.31e-06	0.00200499	hypothetical protein YQE_12480, partial [Dendroctonus ponderosae]
Unigene0041278	0.952433	0.001	-9.89547	6.93e-08	4.07e-05	PREDICTED: uncharacterized protein LOC109546384 isoform X2 [Dendroctonus ponderosae]
Unigene0041409	0.1905	1.34527	2.82003	7.96e-05	0.0149538	--
Unigene0041493	0.7175	0.001	-9.48684	0.000156932	0.0248273	PREDICTED: PHD and RING finger domain-containing protein 1-like [Dendroctonus ponderosae]
Unigene0041660	2.17023	0.001	-11.0836	8.31e-07	0.000365326	--
Unigene0041772	1.20773	0.001	-10.2381	7.97e-05	0.0149538	--
Unigene0041844	1.24347	0.001	-10.2802	3.31e-06	0.00120878	PREDICTED: voltage-dependent anion-selective channel protein 2-like isoform X1 [Dendroctonus ponderosae]
Unigene0041912	4.13037	0.001	-12.0121	0.000175512	0.0265584	PREDICTED: uncharacterized protein LOC109546501 [Dendroctonus ponderosae]
Unigene0041972	0.8815	0.0443667	-4.31241	0.000311573	0.0408433	PREDICTED: proline-, glutamic acid- and leucine-rich protein 1-like [Dendroctonus ponderosae]
Unigene0041973	0.8454	0.001	-9.72349	2.15e-05	0.00548392	--
Unigene0042039	0.2011	1.33497	2.73082	0.000131841	0.0216523	--
Unigene0042049	14.3537	0.0814333	-7.46159	4.27e-05	0.00906602	PREDICTED: trypsin beta-like [Dendroctonus ponderosae]
Unigene0042200	1.51373	0.001	-10.5639	4.3e-10	3.98e-07	GL10783 [Drosophila persimilis]
Unigene0042249	20.584	0.0521667	-8.62418	0.000162768	0.02512	chymotrypsin-like serine proteinase [Anthonomus grandis]
Unigene0042304	1.63653	0.330333	-2.30865	0.000191818	0.0283949	PREDICTED: uncharacterized protein LOC109540813 isoform X2 [Dendroctonus ponderosae]
Unigene0042332	1.79137	0.00613333	-8.19017	0.000158784	0.0248576	PREDICTED: aminopeptidase N-like [Dendroctonus ponderosae]
Unigene0042396	1.92777	0.0374333	-5.68646	1.52e-11	1.88e-08	PREDICTED: glyceraldehyde-3-phosphate dehydrogenase 2-like [Dendroctonus ponderosae]
Unigene0042627	3.07007	0.0483333	-5.98911	3.34e-10	3.16e-07	PREDICTED: dynein light chain Tctex-type-like [Anoplophora glabripennis]
Unigene0042662	1.63987	0.117133	-3.80735	0.000297016	0.0390527	hypothetical protein [Daphnia magna]
Unigene0042683	1.03817	0.001	-10.0198	9.71e-07	0.000418259	PREDICTED: stabilizer of axonemal microtubules 2 [Tribolium castaneum]
Unigene0042695	1.66553	0.001	-10.7018	8.32e-11	8.62e-08	PREDICTED: serine protease gd-like [Aethina tumida]
Unigene0042781	67.6742	24.1438	-1.48695	0.000260522	0.0356546	PREDICTED: epsin-like isoform X3 [Aethina tumida]
Unigene0042874	0.0364	0.9893	4.7644	0.000330961	0.0428683	--
Unigene0043037	1.9885	0.3105	-2.67902	1.61e-05	0.00422158	hypothetical protein RR48_11855 [Papilio machaon]
Unigene0043093	1.0938	0.0361667	-4.91854	1.07e-05	0.00312996	60S ribosomal protein L22 [Sycon ciliatum]
Unigene0043123	22.2583	0.001	-14.4421	2.07e-26	4.5e-22	--
Unigene0043128	1.65247	0.185467	-3.15539	6.44e-06	0.00203244	--
Unigene0043131	1.45317	0.0695667	-4.38466	5.2e-05	0.0107784	hypothetical protein YQE_02980, partial [Dendroctonus ponderosae]
Unigene0043133	0.381033	1.6263	2.0936	4.1e-05	0.00893071	PREDICTED: fez family zinc finger protein 2-like [Dendroctonus ponderosae]
Unigene0043362	1.67977	0.001	-10.714	9.38e-05	0.0170717	daphnid bacterial-ribosomal-RNA-like, possible HGT [Daphnia magna]
Unigene0043418	3.72317	0.9245	-2.00978	4.32e-05	0.00913017	PREDICTED: protein yellow [Aethina tumida]
Unigene0043500	1.8156	0.0497667	-5.18912	1.35e-06	0.000542328	PREDICTED: uncharacterized protein LOC109535045 [Dendroctonus ponderosae]
Unigene0043619	13.351	0.245367	-5.76587	6.92e-11	7.53e-08	PREDICTED: splicing regulatory glutamine/lysine-rich protein 1-like [Anoplophora glabripennis]
Unigene0043886	0.139867	1.18827	3.08673	2.28e-05	0.00566662	hypothetical protein D910_10528 [Dendroctonus ponderosae]
Unigene0043935	3.02513	0.001	-11.5628	1.33e-10	1.32e-07	--
Unigene0043953	3.56003	0.001	-11.7977	2.99e-13	4.2e-10	--
