# Supplementary material for: Transcriptome Analysis of Antennal Chemosensory Genes in Curculio Dieckmanni Faust. (Coleoptera: Curculionidae)
Source: Front Physiol. 2022 May 9;13:896793. doi: 10.3389/fphys.2022.896793 (PMC9124802; doi:10.3389/fphys.2022.896793)
Supplement: Supplementary file 5 [file Table4.XLSX]

## Sheet: Sheet1
Ssequences used in phylogenetic trees
Gene	Accession
TyunOBP9	AMP19491.1
TyunOBP5	AMP19487.1
TyunOBP13	AMP19495.1
TyunOBP12	AMP19494.1
TyunOBP11	AMP19493.1
TyunOBP10	AMP19492.1
TyunOBP8	AMP19490.1
TyunOBP7	AMP19489.1
TyunOBP6	AMP19488.1
TyunOBP4	AMP19486.1
TyunOBP3	AMP19485.1
TyunOBP2	AMP19484.1
TyunOBP1	AMP19483.1
Lory_AHE13795.1	AHE13795.1
Lory_AHE13792.1	AHE13792.1
Lory_AHE13800.1	AHE13800.1
Lory_AHE13799.1	AHE13799.1
Lory_AHE13798.1	AHE13798.1
Lory_AHE13797.1	AHE13797.1
Lory_AHE13796.1	AHE13796.1
Lory_AHE13794.1	AHE13794.1
Lory_AHE13793.1	AHE13793.1
Lory_AHE13791.1	AHE13791.1
DadjOBPJ79	QKV35005.1
DadjOBPJ75	QKV35004.1
DadjOBP30	QKV35003.1
DadjOBP27	QKV35002.1
DadjOBP24	QKV35001.1
DadjOBP23	QKV35000.1
DadjOBP22	QKV34999.1
DadjOBP21	QKV34998.1
DadjOBP18	QKV34997.1
DadjOBP16	QKV34996.1
DadjOBP15	QKV34995.1
DadjOBP13b	QKV34994.1
DadjOBP13a	QKV34993.1
DadjOBP12b	QKV34992.1
DadjOBP12a	QKV34991.1
DadjOBP11b	QKV34990.1
DadjOBP11a	QKV34989.1
DadjOBP8	QKV34988.1
DadjOBP6	QKV34987.1
DadjOBP5	QKV34986.1
DadjOBP4	QKV34985.1
DadjOBP3	QKV34984.1
DarmOBP3	ALM64965.1
DarmOBP15	ALM64973.1
DarmOBP14	ALM64972.1
DarmOBP13	ALM64971.1
DarmOBP8	ALM64970.1
DarmOBP7	ALM64969.1
DarmOBP6	ALM64968.1
DarmOBP5	ALM64967.1
DarmOBP4	ALM64966.1
DarmOBP2	AIY61045.1
DarmOBP1	AIY61044.1
SzeaOBP41	QCT83295.1
SzeaOBP40	QCT83294.1
SzeaOBP39	QCT83293.1
SzeaOBP38	QCT83292.1
SzeaOBP37	QCT83291.1
SzeaOBP36	QCT83290.1
SzeaOBP35	QCT83289.1
SzeaOBP34	QCT83288.1
SzeaOBP33	QCT83287.1
SzeaOBP32	QCT83286.1
SzeaOBP31	QCT83285.1
SzeaOBP30	QCT83284.1
SzeaOBP29	QCT83283.1
SzeaOBP28	QCT83282.1
SzeaOBP27	QCT83281.1
SzeaOBP26	QCT83280.1
SzeaOBP25	QCT83279.1
SzeaOBP24	QCT83278.1
SzeaOBP23	QCT83277.1
SzeaOBP22	QCT83276.1
SzeaOBP21	QCT83275.1
SzeaOBP20	QCT83274.1
SzeaOBP19	QCT83273.1
SzeaOBP18	QCT83272.1
SzeaOBP17	QCT83271.1
SzeaOBP16	QCT83270.1
SzeaOBP15	QCT83269.1
SzeaOBP14	QCT83268.1
SzeaOBP13	QCT83267.1
SzeaOBP12	QCT83266.1
SzeaOBP11	QCT83265.1
SzeaOBP10	QCT83264.1
SzeaOBP9	QCT83263.1
SzeaOBP8	QCT83262.1
SzeaOBP7	QCT83261.1
SzeaOBP6	QCT83260.1
SzeaOBP5	QCT83259.1
SzeaOBP4	QCT83258.1
SzeaOBP3	QCT83257.1
SzeaOBP2	QCT83256.1
SzeaOBP1	QCT83255.1
ItypOBP10	JAA74402.1
ItypOBP11	JAA74401.1
ItypOBP12	JAA74400.1
ItypOBP13	JAA74399.1
ItypOBP14	JAA74398.1
ItypOBP15	JAA74397.1
ItypOBP1	JAA74396.1
ItypOBP2	JAA74395.1
ItypOBP3	JAA74394.1
ItypOBP4	JAA74393.1
ItypOBP5	JAA74392.1
ItypOBP6	JAA74391.1
ItypOBP7	JAA74390.1
ItypOBP8	JAA74389.1
ItypOBP9	JAA74388.1
DadjCSP9	QPZ89241.1
DadjCSP8	QPZ89240.1
DadjCSP6	QPZ89239.1
DadjCSP4	QPZ89238.1
DadjCSP3	QPZ89237.1
DadjCSP2	QPZ89236.1
DadjCSP1	QPZ89235.1
DarmCSP6	AXF54077.1
DarmCSP9	AXF54076.1
DarmCSP8	AXF54075.1
DarmCSP7	AXF54074.1
DarmCSP5	AXF54073.1
DarmCSP4	AXF54072.1
DarmCSP3	AXF54071.1
DarmCSP1	AXF54070.1
DarmCSP2	AXF53965.1
LoryCSP10	AHE13805.1
LoryCSP9	AHE13804.1
LoryCSP8	AHE13803.1
LoryCSP6	AHE13802.1
LoryCSP3	AHE13801.1
TyunCSP4	AMP19499.1
TyunCSP3	AMP19498.1
TyunCSP2	AMP19497.1
TyunCSP1	AMP19496.1
DponCSP5	AFI45003.1
DponCSP2.1	AGI05172.1
DponCSP8	AGI05164.1
DponCSP11	AGI05163.1
DponCSP6.2	AGI05162.1
DponCSP1.2	AGI05161.1
DponCSP3	AGI05160.1
DponCSP6.1	AKK25149.1
DponCSP4	AKK25148.1
DponCSP2.1	AKK25147.1
DponCSP1.1	AKK25146.1
ItypSNMP1	JAA74404.1
ItypSNMP1a	JAA74405.1
ItypSNMP2	JAA74403.1
DponSNMP1a	AGI05171.1
DponSNMP2	AGI05184.1
DponSNMP1-like	XP_019759974.1
DponSNMP2-like	XP_019770844.1
SzeaSNMP1a	QEX07999.1
SzeaSNMP1b	QEX08000.1
SzeaSNMP2a	QEX08001.1
SzeaSNMP2b	QEX08002.1
CforSNMP1	https://www.nature.com/articles/s41598-017-11456-x(Antennal transcriptome and expression analyses of olfactory genes in the sweetpotato weevil Cylas formicarius)
CforSNMP2a
DponOR92a.1	XP_019754377.1
DponOR2-like.1	XP_019765587.1
DponOR46a-likeiX3	XP_019771464.1
DponOR46a-likeiX2	XP_019771463.1
DponOR46a-likeiX1	XP_019771462.1
DponOR94a-like.1	XP_019771321.1
DponOR94a-like.2	XP_019770928.1
DponORco-like	XP_019771075.1
DponOR49b-like.1	XP_019768311.1
DponOR49b-like.2	XP_019768310.1
DponORco	XP_019768125.1
DponOR2-like.2	XP_019768086.1
DponOR49b-like.3	XP_019766007.1
DponOR49b-like.4	XP_019766006.1
DponOR49b-like.5	XP_019765901.1
DponOR83a-likeiX2	XP_019768012.1
DponOR94a-like.3	XP_019765879.1
DponOR49b-like.6	XP_019765855.1
DponOR2-like.3	XP_019764758.1
DponOR2-like.4	XP_019764757.1
DponOR92a.2	XP_019764582.1
DponOR43a-likeiX2	XP_019762728.1
DponOR63a-likeiX1	XP_019762727.1
DponOR7a-like	XP_019762725.1
DponOR49b-like.7	XP_019762540.1
DponOR49b-likeiX2	XP_019762539.1
DponOR49b-likeiX1	XP_019762538.1
DponOR67c-like.1	XP_019762398.1
DponOR85b-like	XP_019762286.1
DponOR4-likeiX2	XP_019762033.1
DponOR4-likeiX1	XP_019762032.1
DponOR2-like.5	XP_019761187.1
DponOR30a-like.1	XP_019759347.1
DponOR30a-like.2	XP_019757135.1
DponOR92a.3	XP_019757019.1
DponOR67c-likeiX2	XP_019756949.1
DponOR49b-likeiX3	XP_019755730.1
DponOR49b-like.8	XP_019755675.1
DponOR4.1	XP_019755672.1
DponOR2a-like	XP_019754574.1
DponOR49b-like.9	XP_019754447.1
DponOR47b-like.1	XP_019753281.1
DponOR2-like.6	XP_019772797.1
DponOR67c-like.2	XP_019771895.1
DponOR2-like.7	XP_019771152.1
DponOR2-like.8	XP_019771140.1
DponOR2-like.9	XP_019766920.1
DponOR2-like.10	XP_019761329.1
DponOR47b-like.2	XP_019755291.1
DponOR22-like	XP_019760873.1
DponOR23	AGI05173.1
DponOR24.1	AGI05166.1
DponOR25	JAA74518.1
DponOR24.2	JAA74513.1
DponOR39	JAA74479.1
DponOR5	JAA74473.1
DponOR37	JAA74469.1
DponOR17.1	AKK25157.1
DponOR15.1	AKK25156.1
DponOR8	AKK25155.1
DponOR7.1	AKK25154.1
DponOR5	AKK25153.1
DponOR1.1	AKK25151.1
DponOR11	JAA74516.1
DponOR8	JAA74515.1
DponOR16	JAA74512.1
DponOR21	JAA74511.1
DponOR4.2	JAA74509.1
DponOR45	JAA74506.1
DponOR13	JAA74505.1
DponOR7.2	JAA74504.1
DponOR19	JAA74501.1
DponOR41	JAA74499.1
DponOR48	JAA74498.1
DponOR43	JAA74493.1
DponOR29	JAA74492.1
DponOR40	JAA74491.1
DponOR46	JAA74490.1
DponOR31	JAA74488.1
DponOR14	JAA74486.1
DponOR33	JAA74484.1
DponOR44	JAA74480.1
DponOR28	JAA74478.1
DponOR3	JAA74476.1
DponOR17.2	JAA74472.1
DponOR36	JAA74470.1
DponOR1.2	JAA74467.1
DponOR27	JAA74466.1
DponOR12	JAA74465.1
DponOR26	JAA74464.1
DponOR32	JAA74463.1
DponOR42	JAA74462.1
DponOR15.2	JAA74461.1
DponOR34	JAA74474.1
DponOR6	JAA74487.1
DponOR2	AKK25152.1
SoryOR46a-like	XP_030750152.1
SoryOR30a-like	XP_030767644.1
SoryOR94a-like	XP_030765751.1
SoryOR49b-like	XP_030764608.1
SoryOR43a-like	XP_030764569.1
SoryOR67a-like	XP_030763199.1
SoryOR85b-like	XP_030760808.1
SoryOR67c-like	XP_030758890.1
SoryOR2-like.1	XP_030758723.1
SoryOR22b-like	XP_030757557.1
SoryOR1-like	XP_030755395.1
SoryOR2a-like	XP_030755158.1
SoryOR92a	XP_030755055.1
SoryOR85c-like	XP_030754409.1
SoryOR2-like.2	XP_030752621.1
SoryORco	XP_030747553.1
SoryOR4-like	XP_030746544.1
SoryOR10a	XP_030746038.1
ItypOR29.1	QWY93917.1
ItypOR28.1	QWY93916.1
ItypOR27.1	QWY93915.1
ItypOR25.1	QWY93914.1
ItypOR23.1	QWY93913.1
ItypOR28.2	JAA74459.1
ItypOR32	JAA74458.1
ItypOR31	JAA74457.1
ItypOR23.2	JAA74456.1
ItypOR16	JAA74455.1
ItypOR34	JAA74454.1
ItypOR2	JAA74453.1
ItypOR8	JAA74452.1
ItypOR17	JAA74451.1
ItypOR18	JAA74450.1
ItypOR4	JAA74449.1
ItypOR13	JAA74448.1
ItypOR9	JAA74447.1
ItypOR19	JAA74446.1
ItypOR27.2	JAA74445.1
ItypOR43	JAA74444.1
ItypOR36	JAA74443.1
ItypOR6	JAA74442.1
ItypOR35	JAA74441.1
ItypOR1	JAA74440.1
ItypOR11	JAA74439.1
ItypOR7	JAA74438.1
ItypOR3	JAA74437.1
ItypOR39	JAA74436.1
ItypOR12	JAA74435.1
ItypOR10	JAA74434.1
ItypOR25.2	JAA74433.1
ItypOR5	JAA74432.1
ItypOR15	JAA74431.1
ItypOR29.2	JAA74430.1
ItypOR26	JAA74429.1
ItypOR33	JAA74428.1
ItypOR14	JAA74427.1
ItypOR41	JAA74426.1
ItypOR40	JAA74425.1
CforOR1	https://www.nature.com/articles/s41598-017-11456-x(Antennal transcriptome and expression analyses of olfactory genes in the sweetpotato weevil Cylas formicarius)
CforOR2
CforOR3
CforOR4
CforOR5
CforOR6
CforOR7
CforOR8
CforOR9
CforOR10
CforOR11
CforOR12
CforOR13
CforOR14
CforOR15
CforOR16
CforOR17
CforOR18
CforOR19
CforOR20
DponIR25a.1	XP_019770830.1
DponIR25a.2	XP_019763174.1
DponIR21a	XP_019753472.1
DponIR8a	AGI05169.1
DponIR25a	JAA74471.1
DponIR76b	JAA74508.1
DponIR75s	JAA74507.1
DponIR75p.1	JAA74502.1
DponIR75p.2	JAA74497.1
DponIR93a.1	JAA74495.1
DponIR64	JAA74485.1
DponIR21a.1	JAA74483.1
DponIR93a.2	JAA74482.1
DponIR75q	JAA74481.1
DponIR41a	JAA74477.1
ItypIR68a	JAA74412.1
ItypIR75s.2	JAA74411.1
ItypIR75p	JAA74410.1
ItypIR75s	JAA74409.1
ItypIR64a	JAA74408.1
ItypIR76b	JAA74407.1
ItypIR25a	JAA74406.1
SoryIR25a	XP_030756779.1
SoryIR40a-like	XP_030764108.1
SoryIR75a-like.1	XP_030764049.1
SoryIR25a	XP_030750371.1
SoryIR93a	XP_030750228.1
SoryIR75a-likeX2	XP_030749280.1
SoryIR75a-likeX1	XP_030749279.1
SoryIR21a	XP_030748843.1
SoryIR75a-like.2	XP_030768286.1
CforIR25a	https://www.nature.com/articles/s41598-017-11456-x(Antennal transcriptome and expression analyses of olfactory genes in the sweetpotato weevil Cylas formicarius)
CforIR8a
CforIR76b
CforIR40a
CforIR41a
CforIR64a
CforIR68a
CforIR75c
CforIR75q.1
CforIR75s
CforIR93a
CforGluR1
CforGluR2
CforGluR3
LoryIR21a	https://doi.org/10.1016/j.cbd.2019.02.007(Identification and expression analysis of candidate chemosensory receptors based on the antennal transcriptome of Lissorhoptrus oryzophilus)
LoryIR8a
LoryIR25a
LoryIR40a
LoryIR64a
LoryIR64a1
LoryIR68a
LoryIR76b
LoryIR41a
LoryIR93a
DponGR64	XP_019763584.1
DponGR28b	XP_019760833.1
DponGR64e-like.1	XP_019760212.1
DponGR64f-like.1	XP_019760210.1
DponGR64e-like.2	XP_019756417.1
DponGR64f-like.2	XP_019763159.1
DponGr1	JAA74489.1
DponGr3	JAA74468.1
DponGR3	AKK25150.1
ItypGR6	JAA74417.1
ItypGR4	JAA74416.1
ItypGR3	JAA74415.1
ItypGR2	JAA74414.1
ItypGR5	JAA74413.1
SoryGR64f-like	XP_030761275.1
SoryGR64b-like	XP_030761259.1
SoryGR64a-like.1	XP_030761258.1
SoryGR64a-like.2	XP_030761257.1
SoryGR64e-likeX2	XP_030761256.1
SoryGR64e-likeX1	XP_030761254.1
SoryGR64e-like	XP_030761238.1
SoryGR3-like	XP_030759073.1
SoryGR5a	XP_030757091.1
SoryGR2a	XP_030756328.1
SoryGR28a	XP_030752758.1
SoryGR43a	XP_030759602.1
LoryGR1	https://doi.org/10.1016/j.cbd.2019.02.007(Identification and expression analysis of candidate chemosensory receptors based on the antennal transcriptome of Lissorhoptrus oryzophilus)
LoryGR3
LoryGR4
LoryGR5
LoryGR6
LoryGR7
LoryGR8
LoryGR9
LoryGR10
CforGR3	https://www.nature.com/articles/s41598-017-11456-x(Antennal transcriptome and expression analyses of olfactory genes in the sweetpotato weevil Cylas formicarius)
CforGR43a.1
CforGR63a
CforGR43a.2
CforGR6
CforGR5
CforGR2
CforGR4
CforGR1
CforGR7
CforGR21a
