# Supplementary material for: Transcriptome Analysis of Antennal Chemosensory Genes in Curculio Dieckmanni Faust. (Coleoptera: Curculionidae)
Source: Front Physiol. 2022 May 9;13:896793. doi: 10.3389/fphys.2022.896793 (PMC9124802; doi:10.3389/fphys.2022.896793)
Supplement: Supplementary file 6 [file Table1.XLSX]

## Sheet: Sheet1
Table S3 Reads Per kb per Million reads (RPKM) for the different samples
GeneID	DM1_rpkm	DM2_rpkm	DM3_rpkm	DF1_rpkm	DF2_rpkm	DF3_rpkm
Unigene0000001	7.1919	3.16	6.1312	5.8523	4.3553	4.7929
Unigene0000002	0.8356	0.1165	0.3732	0.5332	1.2923	1.3993
Unigene0000003	1.0465	0.5019	1.1957	0.7069	0.7399	0.7136
Unigene0000004	2.973	2.797	1.5647	2.1949	2.5526	2.831
Unigene0000005	173.452	221.109	160.123	168.095	185.138	172.367
Unigene0000006	0.5085	0.6379	1.6103	1.2743	0.351	0.8039
Unigene0000007	1.9874	0.3331	1.1426	1.4692	0.845	1.0354
Unigene0000008	1.8082	2.1994	2.8628	1.0697	1.3172	1.0163
Unigene0000009	0.7955	0.5373	1.2023	1.0541	0.8	1.064
Unigene0000010	44.8402	48.5906	83.0818	46.8826	46.0854	40.4697
Unigene0000011	0.3312	0	0.1479	0.1268	0	0.256
Unigene0000012	3.4819	2.2779	5.4681	5.9312	2.4031	4.2296
Unigene0000013	25.7137	12.836	25.5468	24.2727	23.4926	22.6951
Unigene0000014	0.4072	0	0.1364	0.2338	0.2576	0
Unigene0000015	5.8067	2.5199	8.2416	7.9303	8.8166	9.5697
Unigene0000016	4.8312	3.0302	6.2925	5.2291	4.4634	5.1895
Unigene0000017	7.7155	4.3322	10.7299	7.7637	10.0412	7.6665
Unigene0000018	0.3522	0.6628	0.2359	0.5057	0.5571	0.4083
Unigene0000019	7.2383	4.301	6.8899	2.6251	8.315	3.0915
Unigene0000020	3.9725	2.1479	4.4042	8.6524	7.4528	6.7489
Unigene0000021	235.893	128.275	165.054	208.357	199.971	203.837
Unigene0000022	0.6966	0.1248	0.2666	0.4571	0.8814	0.4614
Unigene0000023	8.5262	3.265	6.0124	5.319	5.5575	6.7114
Unigene0000024	0	0	0	0	0	0
Unigene0000025	1.0509	2.3831	2.4368	0.3714	0.5114	0.2812
Unigene0000026	1.3342	0.2542	1.4706	1.1637	1.4744	0.9593
Unigene0000027	3.0119	0.9088	2.4265	3.3877	2.6585	3.0717
Unigene0000028	5.0376	1.5782	5.6405	3.7318	3.679	4.3699
Unigene0000029	3.9069	0.9693	3.6986	2.5625	2.6145	1.8519
Unigene0000030	0	0	0	0	0	0
Unigene0000031	0.5957	0.5605	1.4964	0.9407	0.4711	0.7769
Unigene0000032	0.5354	0.9702	1.1158	0.8882	1.1668	0.8966
Unigene0000033	1.9908	1.0283	1.0197	2.0845	0.889	0.8824
Unigene0000034	0.5228	0.9473	1.0895	1.2009	0.5145	0.8755
Unigene0000035	4.0347	2.6107	3.1987	3.6072	3.425	2.8567
Unigene0000036	0.8398	0.6057	0.7031	1.5913	1.2751	1.1196
Unigene0000037	6.0582	3.2808	7.0076	7.6624	5.9601	6.7137
Unigene0000038	9.6021	8.6868	9.6033	13.6446	11.0577	11.1314
Unigene0000039	1.2754	1.0665	1.8224	1.1229	1.7751	1.922
Unigene0000040	0.6439	0.0621	0	0.2844	0.2507	0.5168
Unigene0000041	5.9171	2.808	5.6578	5.5272	5.6175	5.5188
Unigene0000042	1.8602	1.1667	2.2618	2.1015	2.5712	2.4143
Unigene0000043	1.5527	0.3652	0.26	0.2972	0.4912	0.1125
Unigene0000044	1.5845	1.64	1.7283	2.2771	1.6652	1.8268
Unigene0000045	1.8209	1.3802	2.1132	3.0193	2.5257	2.3253
Unigene0000046	0.7101	1.4104	1.9819	0.6796	0.3744	0.6174
Unigene0000047	1.0282	0.3762	0.8609	1.722	0.542	0.4966
Unigene0000048	4.0878	3.1395	5.141	2.8743	3.9056	2.8046
Unigene0000049	42.7407	60.7069	35.43	24.1585	46.3097	36.8613
Unigene0000050	51.2691	34.8827	69.0869	50.0167	53.6225	48.4403
Unigene0000051	9.1939	4.3706	10.531	8.0387	6.9917	6.7122
Unigene0000052	1.1949	1.0278	0.5946	0.745	1.2527	0.5541
Unigene0000053	1.294	0.708	2.0286	1.8023	2.0728	0.9256
Unigene0000054	40.326	54.8516	58.0007	51.0343	38.4134	40.6887
Unigene0000055	8.669	3.9976	12.1443	5.9682	7.7991	5.5989
Unigene0000056	3.3465	0.626	2.1561	2.0838	3.0301	2.3546
Unigene0000057	0.4789	0.6008	0.9981	0.7945	0.6733	1.4189
Unigene0000058	0.7661	0.4411	0.9253	1.1971	1.0646	1.6597
Unigene0000059	0.4198	0.3009	0.241	0.7577	0.3794	0.9039
Unigene0000060	0.6164	0.232	0.3303	1.1327	0.39	0.5717
Unigene0000061	6.1163	5.5083	5.5676	2.3414	4.8616	5.1814
Unigene0000062	6.4601	10.1759	9.6783	9.0897	6.146	7.003
Unigene0000063	5.2691	3.3048	7.0589	9.3096	6.667	5.7559
Unigene0000064	0.3414	1.0706	0.343	1.6663	0.324	1.2863
Unigene0000065	3.1933	5.2011	5.7719	3.3414	2.2832	3.0085
Unigene0000066	16.973	3.0963	17.6864	33.1399	26.2063	30.4044
Unigene0000067	5.9107	0.9849	3.85	2.9772	4.8921	4.8428
Unigene0000068	12.1316	1.7773	6.5009	4.5153	8.1344	8.3972
Unigene0000069	12.6806	2.0525	6.7129	5.9896	7.5048	12.0131
Unigene0000070	0.4109	0.5155	0.5505	0.3776	0.312	0.3811
Unigene0000071	1.0249	0.6708	0.8357	0.5629	1.6351	0.9298
Unigene0000072	0.2017	0.2531	0.6757	0.2317	1.4039	0.5847
Unigene0000073	3.3121	1.2926	2.12	4.3532	3.5389	5.5034
Unigene0000074	1.5352	0.9629	1.8697	2.0036	1.4127	2.1842
Unigene0000075	0.0995	0.4993	0	0	0	0
Unigene0000076	0.7247	0.8658	0.4161	0.5153	0.6987	0.6001
Unigene0000077	2.276	0.803	1.7151	0.8168	1.3499	0.9894
Unigene0000078	0.7265	0.1657	0.4424	0.4551	0.2507	0.7656
Unigene0000079	1.2126	0.3803	0.4874	0	0.1534	0.6326
Unigene0000080	767.348	479.119	682.404	1405.08	1160.93	1211.76
Unigene0000081	1.4845	2.4351	2.0907	4.0654	1.8301	2.4269
Unigene0000082	0.1981	0.2485	0	0.1138	0.1253	0.5742
Unigene0000083	0.844	0.7058	0.848	0.8885	0.6675	0.5708
Unigene0000084	3.004	3.201	3.7648	1.3355	2.4522	1.7225
Unigene0000085	2.049	1.5034	1.8645	1.7538	1.3941	1.5462
Unigene0000086	1.6273	1.0207	0.6937	0.8495	0.7488	0.5145
Unigene0000087	0.1474	1.0173	0.0988	0.0847	0.0933	0.4273
Unigene0000088	7.1922	3.4588	9.8576	6.1424	4.7708	5.8729
Unigene0000089	163.435	54.9756	161.727	43.8004	98.3908	99.9635
Unigene0000090	3.0569	3.3612	2.0729	2.4272	3.2949	1.6188
Unigene0000091	6.1009	2.2567	4.5207	7.0835	6.5742	5.7513
Unigene0000092	1.1096	0.6593	1.33	1.0731	1.1822	0.8801
Unigene0000093	10.3731	10.2703	8.3379	8.8496	9.4219	11.7246
Unigene0000094	11.5893	9.2157	9.6395	10.0052	9.2538	10.3624
Unigene0000095	1.9915	1.5966	3.1093	2.5451	2.122	2.0483
Unigene0000096	54.522	14.596	19.8191	19.5673	45.7453	37.2873
Unigene0000097	4.5467	2.6466	2.6909	2.6287	5.2997	4.2028
Unigene0000098	8.4007	2.1493	9.8947	6.6101	4.7779	5.0332
Unigene0000099	10.5882	3.3249	13.5939	9.8728	7.8895	7.6077
Unigene0000100	0.0909	0	0	0	0	0
Unigene0000101	1.2743	0.3307	0.1177	0.5551	0.9452	0.8151
Unigene0000102	5.6528	1.7423	3.2022	3.3387	4.7001	3.6323
Unigene0000103	0.8024	0.4718	0.7726	0.5183	1.3325	0.407
Unigene0000104	10.9032	15.6079	13.6328	6.6291	10.3332	8.3273
Unigene0000105	0.4306	0.2881	0.2308	1.8133	1.5982	1.6307
Unigene0000106	0	0.0681	0.1454	0.0623	0.0687	0
Unigene0000107	1.2397	0.3888	0.8442	1.0559	1.7516	0.8144
Unigene0000108	0.68	1.3182	1.0765	2.0587	1.4078	1.0032
Unigene0000109	4.1099	2.0266	3.6014	1.9444	3.9574	2.9067
Unigene0000110	3.2447	4.184	4.9852	2.7101	2.4977	3.0513
Unigene0000111	1.6469	0.5602	1.6267	2.6126	2.7372	3.2359
Unigene0000112	3.1733	1.2647	2.8109	3.999	5.1779	4.041
Unigene0000113	0	0	0	0	0	0
Unigene0000114	2.0848	0.7555	0.8689	1.2237	0.762	1.6649
Unigene0000115	6.795	5.0406	5.8066	4.0963	5.4842	4.9985
Unigene0000116	0.6915	0.3154	1.0948	0.722	1.1931	0.8745
Unigene0000117	1.4794	0.3569	1.2196	2.5485	1.5119	1.9789
Unigene0000118	0.3093	1.8428	1.243	0.7992	0.7827	0.7171
Unigene0000119	8.0275	5.9287	7.6971	8.1068	8.8739	8.6476
Unigene0000120	1.7981	0.6852	1.6465	1.2285	2.1599	1.1082
Unigene0000121	2.3952	1.353	1.3387	1.348	1.8264	1.4711
Unigene0000122	0.8356	1.1647	0	0	0.9399	1.0764
Unigene0000123	0.4697	1.031	0.3146	1.0113	0.7428	1.3611
Unigene0000124	2.6455	2.3361	4.5234	5.6567	4.0521	3.9546
Unigene0000125	9.0269	5.4932	10.5634	9.3024	9.0761	8.5025
Unigene0000126	4.34	2.9807	6.2614	6.7209	5.2429	4.7808
Unigene0000127	882.345	1743.02	1017.71	993.209	974.616	972.468
Unigene0000128	0.8494	0.2664	0.2845	0.6097	0.2687	0.3693
Unigene0000129	3.3535	2.2496	4.9027	2.0596	2.3614	1.9269
Unigene0000130	14.4314	20.4016	18.5277	13.4496	13.1514	14.539
Unigene0000131	1.2578	0.293	0.6499	1.3001	1.0686	1.6039
Unigene0000132	0	0.2379	5.2089	0	0	0
Unigene0000133	0	0	0	0	0	0
Unigene0000134	28.508	17.0363	28.9207	26.9169	26.6231	24.721
Unigene0000135	4.7798	3.3499	4.9775	4.7059	3.9482	3.7071
Unigene0000136	0.5562	0.4186	1.0431	1.2775	1.0556	1.0316
Unigene0000137	0.9565	0	1.2814	1.5379	1.2103	1.1089
Unigene0000138	3.4947	2.2162	4.0835	3.2107	2.8496	2.6783
Unigene0000139	2.4935	1.9061	2.5053	1.9624	1.831	2.1551
Unigene0000140	0.9501	0.4256	0.3637	0.4676	0.3435	0.3147
Unigene0000141	1.1453	0	0.1918	0.3288	0.1811	0
Unigene0000142	0	0	0	0	0	0
Unigene0000143	0	0	0	0	0	0
Unigene0000144	0.1132	0.213	0.1517	0	0	0
Unigene0000145	6.0328	3.2142	4.7241	0.7528	2.4311	0.0062
Unigene0000146	1.7436	1.3918	1.3449	2.0024	1.3371	0.735
Unigene0000147	1.8865	1.0757	2.0079	2.5348	2.1511	2.0228
Unigene0000148	4.71	2.4428	5.3997	5.8772	3.4954	4.6726
Unigene0000149	6.6117	2.3947	4.4287	3.7966	3.8529	4.1562
Unigene0000150	4.8172	2.3729	4.4104	4.0946	4.7738	4.033
Unigene0000151	6.0259	2.1247	5.9395	8.0319	7.5454	7.9176
Unigene0000152	0.9451	0.8536	1.7219	0.3473	1.6742	0.9203
Unigene0000153	0.0948	0.119	0.2541	0.1089	0.12	0.6596
Unigene0000154	45.8469	56.9214	40.6501	33.5147	34.3372	33.0297
Unigene0000155	2.3272	2.5022	3.563	2.959	3.3652	2.9868
Unigene0000156	1.6986	1.1473	1.6629	0.6753	1.0746	1.237
Unigene0000157	0.7126	0.1915	0.8182	0.2338	0.966	0.531
Unigene0000158	7.1094	6.7272	7.5973	8.0703	7.9815	8.718
Unigene0000159	2.1586	2.2785	2.0454	2.2069	2.4647	2.5329
Unigene0000160	3.3633	4.7566	4.4173	3.0294	3.7549	2.3699
Unigene0000161	7.685	8.9557	11.0264	10.7059	10.7019	9.7524
Unigene0000162	3.0307	0.8538	2.2365	4.1443	3.7535	2.8435
Unigene0000163	0.1913	0	0	0.4394	0.121	0
Unigene0000164	0	0	0.5126	0.4394	0.121	0
Unigene0000165	2.9082	1.5068	4.1502	1.9604	3.1998	1.9789
Unigene0000166	4.6011	1.7366	3.2729	6.1726	6.0793	7.5996
Unigene0000167	0.1348	0	0.3611	0	0.1137	0
Unigene0000168	2.2648	1.1473	3.8656	2.2634	1.9702	2.5877
Unigene0000169	26.1181	13.1643	26.4623	21.4204	19.0647	20.5998
Unigene0000170	1.3336	1.2714	1.4293	1.0415	1.7549	0.5566
Unigene0000171	2.9574	3.5998	4.2847	3.019	1.469	2.3872
Unigene0000172	0.8322	1.1599	0.8671	0.9557	0	0.5359
Unigene0000173	158.489	136.909	137.154	162.436	197.826	185.006
Unigene0000174	0.6674	1.0465	0.2235	0.6707	0.3167	0.7737
Unigene0000175	116.57	118.51	119.81	127.25	153.149	146.692
Unigene0000176	0.3568	0.537	0.8603	0.8195	0.7223	1.8198
Unigene0000177	3.3784	2.9914	3.4609	2.7767	2.5564	3.1869
Unigene0000178	3.7364	1.3308	2.7566	2.979	2.2937	2.6894
Unigene0000179	0.6896	2.0445	0.9238	1.2239	0.4759	0.0727
Unigene0000180	4.0347	0.3996	3.6983	1.7071	1.6121	0.7385
Unigene0000181	2.8669	3.0045	3.6948	3.5008	3.306	2.9869
Unigene0000182	0.1921	0.9239	0.858	1.3239	0.4052	0.9652
Unigene0000183	2.7262	2.7358	3.5791	3.8823	4.2773	4.867
Unigene0000184	0.5029	0.7886	0.758	1.2995	0.5568	1.4575
Unigene0000185	5.3511	2.7639	5.0953	4.0367	2.8211	2.828
Unigene0000186	3.5851	2.8107	4.3137	3.6789	3.2131	2.9631
Unigene0000187	30.3556	20.8234	36.9102	55.2289	46.4189	46.99
Unigene0000188	67.0441	76.4244	61.5293	77.4594	65.6858	74.0579
Unigene0000189	0.6164	1.9331	1.6516	2.7137	1.2999	2.5011
Unigene0000190	0.73	1.1446	0.929	1.3413	0.5542	0.7616
Unigene0000191	0.2403	1.0049	1.0732	0.092	0.2027	0.8358
Unigene0000192	14.8298	11.7443	14.0505	13.194	14.2877	12.4277
Unigene0000193	1.6438	0.4536	1.1891	0.7929	1.8719	1.2196
Unigene0000194	0.7939	0.0474	1.0129	1.3893	0.9567	0.6136
Unigene0000195	18.6576	23.4325	32.5025	12.6133	17.3424	19.8811
Unigene0000196	1.3176	0.7539	1.2077	1.4601	1.0822	1.1523
Unigene0000197	4.7474	1.8004	2.6623	1.9019	2.7938	3.3277
Unigene0000198	1.4086	36.7806	0.7692	0.6517	0.4392	0.2554
Unigene0000199	5.9705	6.429	7.5029	7.0994	7.4207	6.7988
Unigene0000200	18.5262	6.4627	11.7861	14.3788	15.2712	15.2817
Unigene0000201	8.1419	2.2425	6.1306	6.8957	5.9746	7.0734
Unigene0000202	2.7962	2.1269	3.2279	3.0405	1.9572	3.0001
Unigene0000203	0.7849	1.5216	1.625	1.557	1.896	1.0753
Unigene0000204	1.5151	2.4595	3.7012	2.6611	3.9467	2.7895
Unigene0000205	3.4067	3.0353	3.071	5.4115	5.1967	4.3552
Unigene0000206	2.0894	0.8134	1.4478	0.9102	0.4558	0.6682
Unigene0000207	2.7071	1.363	1.92	1.334	2.406	1.6506
Unigene0000208	46.6866	38.6352	42.213	69.5421	58.6481	61.2184
Unigene0000209	2.0165	3.6746	12.2301	3.1108	2.3991	2.2678
Unigene0000210	5.3807	2.4315	7.8351	9.6337	7.9921	6.7025
Unigene0000211	0.5998	0.1881	0.9039	0.5166	1.2332	0.5215
Unigene0000212	0.4171	0.7325	1.0059	0.479	1.1611	0.4836
Unigene0000213	1.7423	0.6902	0.6142	1.369	0.8122	1.063
Unigene0000214	3.628	2.0479	2.1871	4.8609	3.1368	2.2431
Unigene0000215	0.8957	0.9424	1.3935	1.261	1.4258	1.2729
Unigene0000216	8.6939	3.8562	8.0435	4.3027	5.2267	6.7933
Unigene0000217	3.8098	1.8201	4.913	4.2629	5.1584	3.2815
Unigene0000218	0.9377	0	0	0.5384	0	0.4529
Unigene0000219	25.5416	21.5767	29.9947	25.7059	24.69	23.3712
Unigene0000220	3.0975	1.178	1.978	1.8815	3.0345	2.4821
Unigene0000221	21.2022	3.1114	17.4643	16.8915	18.0965	21.6737
Unigene0000222	75.7793	78.6478	74.3865	68.8878	70.7471	70.4358
Unigene0000223	1.2966	0.2324	1.6874	0.4255	0.2813	0.5154
Unigene0000224	0	0	0	0	0	0
Unigene0000225	3.4714	4.2141	5.5757	4.8227	3.3297	4.046
Unigene0000226	1.4851	0.5416	1.0167	1.5327	1.5231	1.3196
Unigene0000227	5.3948	0.6977	3.5019	2.1078	3.9408	3.6751
Unigene0000228	1.0385	0.1371	1.4645	1.0043	0.8991	0.5703
Unigene0000229	1.4837	0.971	0.6049	0.4445	1.2243	0.0748
Unigene0000230	0.9754	0.6118	0.49	0.5601	2.237	0.424
Unigene0000231	1.453	0.5523	0.5899	0.8596	0.6685	0.9188
Unigene0000232	0.8488	0.4563	0.9747	0.6267	1.074	0.5623
Unigene0000233	11.046	8.0466	8.975	7.253	10.498	9.1159
Unigene0000234	2.5096	1.9463	2.7762	2.2842	3.5575	2.8128
Unigene0000235	1.397	1.0784	1.2237	0.3085	0.9518	1.0589
Unigene0000236	1.0745	1.0483	0.7997	0.617	1.3218	1.0726
Unigene0000237	1.0148	1.4428	1.4502	0.3885	0.5992	0.8627
Unigene0000238	1.6174	0.4321	2.7338	1.801	1.7061	1.9397
Unigene0000239	2.0574	0.6809	3.3716	3.226	2.6368	2.7019
Unigene0000240	2.2837	0.8536	1.6224	1.8279	1.7366	2.2329
Unigene0000241	8.9516	2.1037	6.6438	7.0598	8.0333	7.9335
Unigene0000242	2.7944	2.062	3.1931	6.8904	4.4717	6.0979
Unigene0000243	22.6374	11.1347	24.6069	20.7482	20.3414	22.4258
Unigene0000244	3.1807	4.5467	4.2611	4.2475	3.8373	5.2308
Unigene0000245	4.1748	1.295	4.68	3.3054	3.997	3.0972
Unigene0000246	4.0566	1.0921	4.9134	4.1695	5.25	4.2518
Unigene0000247	0	0	0	0.1671	0	0.0843
Unigene0000248	0	0	0	0	0.0894	0
Unigene0000249	1.1847	0.2286	1.2819	0.2617	0.3459	1.2678
Unigene0000250	2.5507	0.4799	3.0754	1.3182	4.6797	2.4395
Unigene0000251	1.6317	0.9825	1.5739	1.1993	0.991	0.908
Unigene0000252	0.8054	0.5849	0.8518	1.5578	1.0995	1.4497
Unigene0000253	18.3009	13.4488	16.2758	19.1028	19.1127	20.4103
Unigene0000254	14.2967	2.053	3.2566	2.9576	3.3499	4.9386
Unigene0000255	36.1437	11.3041	33.8838	26.9684	26.4006	24.7159
Unigene0000256	27.6389	8.2587	27.9646	20.652	21.6425	18.4822
Unigene0000257	4.2293	2.8711	4.8659	7.1998	4.4069	4.6721
Unigene0000258	5.1009	4.375	6.2583	5.0251	3.5318	3.7539
Unigene0000259	0.6935	0.348	1.3006	0.7168	0.8774	1.2059
Unigene0000260	3.5878	2.2503	5.4295	3.6625	3.6149	3.3119
Unigene0000261	1.0292	1.1296	0.8617	2.2161	1.8719	2.237
Unigene0000262	2.1735	1.2601	2.2021	2.0766	2.0799	1.9479
Unigene0000263	0.2684	0.1122	0	0	0.2264	0.3112
Unigene0000264	1.7271	0.9402	1.6152	1.9834	1.7317	1.3599
Unigene0000265	0.8338	1.2872	1.8043	1.8414	2.5562	0.632
Unigene0000266	1.5505	1.094	3.1157	1.4468	2.8201	1.5727
Unigene0000267	2.2049	0.8922	1.9057	1.1436	0.8099	1.814
Unigene0000268	19.6469	18.7056	19.5666	27.893	19.0168	20.8916
Unigene0000269	10.5463	11.2082	9.1246	11.2707	9.0814	10.7826
Unigene0000270	2.2956	1.2341	2.4896	1.8831	0.8299	1.394
Unigene0000271	2.8019	3.0578	3.4909	1.4802	2.3753	2.566
Unigene0000272	0.3107	0	0.2973	0.7646	0.8423	0.9261
Unigene0000273	2.9323	1.6726	2.1258	1.4205	1.7024	1.8605
Unigene0000274	1.0807	0.2711	1.3996	1.3239	0.7293	0.877
Unigene0000275	1.1063	1.0612	0.8718	0.5232	0.9057	0.3018
Unigene0000276	29.5033	17.5576	26.3194	29.1092	29.3017	24.506
Unigene0000277	1.0683	1.1196	1.3982	1.4528	1.4361	1.5195
Unigene0000278	1.377	0.9301	1.9157	1.5814	0.9382	1.9647
Unigene0000279	0.49	0.0878	0.844	1.5275	1.3286	3.2461
Unigene0000280	2.1741	1.1019	2.28	1.9167	2.0562	1.3493
Unigene0000281	0.8948	0.2245	0.8391	0.2055	1.2454	0.8299
Unigene0000282	4.6511	1.1001	5.7908	5.779	5.3156	5.0187
Unigene0000283	1.4794	0.567	1.4589	1.0619	0.754	1.191
Unigene0000284	12.0806	7.414	18.1726	19.5145	9.6335	15.4162
Unigene0000285	4.7911	3.2348	4.8548	4.5515	3.8811	4.673
Unigene0000286	3.3936	2.5698	3.4987	4.6157	3.8783	3.0095
Unigene0000287	1.4632	0.9483	1.5681	2.3245	1.5736	1.4135
Unigene0000288	3.0703	2.185	2.6499	3.1305	2.7891	3.0346
Unigene0000289	0.2484	0.8309	0.4437	1.046	1.2572	0.5759
Unigene0000290	1.9032	2.3396	2.1927	2.0545	0.8669	1.5444
Unigene0000291	3.3815	1.0604	1.6988	2.7912	2.273	1.3475
Unigene0000292	1.2973	1.8843	0.3659	0.2352	0.7775	1.4248
Unigene0000293	4.0592	2.449	4.043	3.3725	2.1717	3.0082
Unigene0000294	8.7522	5.7373	6.6568	6.8739	6.2872	6.8405
Unigene0000295	2.2956	3.1449	3.1698	5.0531	2.8027	3.1865
Unigene0000296	0.9483	0	0.2541	0.9802	0.36	0.6596
Unigene0000297	4.8456	2.9191	3.5524	5.5766	3.8351	4.4883
Unigene0000298	4.0878	2.1976	4.0234	5.6527	5.3834	3.4816
Unigene0000299	3.7287	0.7617	2.0124	6.3621	4.61	4.9648
Unigene0000300	6.1747	0.8091	2.369	6.1424	5.4011	6.8556
Unigene0000301	5.76	1.4451	2.2743	6.232	5.9839	5.9745
Unigene0000302	0.3818	0.7184	0.959	0.9317	0.3623	0
Unigene0000303	3.8392	1.9234	2.9458	3.2351	2.8875	3.2243
Unigene0000304	1.1422	0.4094	1.2569	1.0306	2.013	0.7093
Unigene0000305	3.4945	1.5775	4.2193	4.6395	3.5626	4.4768
Unigene0000306	0.4772	0.6735	0.6393	1.5072	0.4529	0.7607
Unigene0000307	2.6835	1.6099	2.282	1.9295	2.6572	2.2182
Unigene0000308	3.0139	0.9167	3.3201	2.8149	2.7969	2.7362
Unigene0000309	109.266	130.273	109.235	120.576	105.061	128.755
Unigene0000310	1.5856	0.5389	1.6533	2.5297	1.8482	2.4449
Unigene0000311	9.5375	6.1877	9.9377	7.9348	7.4119	7.137
Unigene0000312	6.8998	4.0223	7.9213	8.6472	8.606	7.5897
Unigene0000313	2.6022	2.2366	5.907	2.8501	1.8292	1.7876
Unigene0000314	1.0292	0.4841	2.1542	1.6251	0.7325	0.7457
Unigene0000315	7.8809	1.723	4.8025	8.4913	6.6313	7.826
Unigene0000316	2.6973	0.6152	1.7246	3.52	4.266	2.8426
Unigene0000317	2.8073	1.1827	2.5355	2.6746	3.463	2.292
Unigene0000318	17.0337	3.0567	16.6075	9.9984	14.1588	15.2213
Unigene0000319	3.4435	7.8391	10.3367	3.0758	3.066	2.4395
Unigene0000320	0.9463	0.3829	1.513	0.8764	0.2704	0.5662
Unigene0000321	4.6422	0.8858	3.0219	3.9647	4.4922	4.0703
Unigene0000322	1.9932	0.7501	0.6231	1.6405	3.1525	1.0013
Unigene0000323	1.2793	0	1.3183	1.1302	0.8716	1.5401
Unigene0000324	2.0638	1.3329	1.7246	2.9803	2.6113	2.961
Unigene0000325	2.5825	1.2958	1.3839	2.0549	1.2137	1.7749
Unigene0000326	0	0.0934	0.0998	0.0855	0.2827	0.4748
Unigene0000327	0	0	0	0	0	0
Unigene0000328	0.0704	0.0884	0.1888	0	0.0891	0.0817
Unigene0000329	0.5266	0.4718	1.9147	0.6047	0.1904	0
Unigene0000330	4.3575	1.3665	2.4864	5.1434	4.3904	3.1338
Unigene0000331	1.285	0.4861	1.5028	0.5622	0.671	0.4965
Unigene0000332	7.8499	2.083	2.9324	0.7802	5.1572	4.9001
Unigene0000333	1348.13	3035.79	493.228	1235.29	2058.97	832.061
Unigene0000334	0.8876	0.3118	0.4281	0.6932	1.7072	0.8644
Unigene0000335	1.5776	0.7916	1.1272	1.9325	0.5323	1.0973
Unigene0000336	1.6826	0.745	1.8033	2.2507	2.2543	1.5605
Unigene0000337	3.2807	1.2989	3.5774	4.0806	3.4891	3.6137
Unigene0000338	0.549	0.1087	0.3484	0.5309	0.5484	0.5359
Unigene0000339	1.7552	1.0223	1.5956	1.1879	1.5863	1.5988
Unigene0000340	0.7061	0.3796	0.8558	1.004	1.1487	0.8575
Unigene0000341	2.2618	0.8565	1.5436	2.2054	0.8639	1.2368
Unigene0000342	6.7173	10.2319	11.3022	10.1941	6.931	12.6078
Unigene0000343	4.6298	4.5059	4.0636	3.2086	2.828	3.794
Unigene0000344	1.0546	1.0473	1.1185	0.4542	0.7228	0.5604
Unigene0000345	1.113	0.349	1.3979	1.5179	1.3203	1.6935
Unigene0000346	5.2909	2.2517	5.0409	4.2106	5.15	3.561
Unigene0000347	1.2662	0.418	0.0893	0.4592	0.5059	0.5408
Unigene0000348	3.0516	1.7704	3.1172	5.1474	3.9215	4.6653
Unigene0000349	13.729	9.6849	12.0539	9.9143	7.3565	9.769
Unigene0000350	0.3511	0.4405	0.0941	1.1291	1.0663	0.8141
Unigene0000351	7.3272	4.1364	6.2605	6.7332	3.6456	4.1204
Unigene0000352	2.0643	0.9248	2.6667	3.8947	3.9179	4.1024
Unigene0000353	9.5401	3.4688	8.4277	10.7974	12.071	8.9758
Unigene0000354	6.8178	7.3255	7.111	8.5605	7.1487	8.0688
Unigene0000355	2.9036	3.4368	3.2581	3.5683	3.5231	3.8608
Unigene0000356	1.0203	0.3733	1.7085	0.7812	0.5917	1.4292
Unigene0000357	0.208	0.6089	0.0929	0.4778	1.1407	0.3216
Unigene0000358	0.1826	0.5728	0	0.6293	0.1155	0.1059
Unigene0000359	1.2156	1.3475	0.7574	0.3896	1.5023	1.1142
Unigene0000360	25.854	14.8182	20.9368	21.7342	24.4477	21.4083
Unigene0000361	1.104	0.277	0.0986	0.5072	1.9091	0.4693
Unigene0000362	1.8093	0.2003	0.7486	1.8029	2.2557	1.604
Unigene0000363	2.4242	1.1696	2.2484	1.392	0.236	2.4861
Unigene0000364	6.1029	2.6379	5.536	5.0666	6.0473	4.3302
Unigene0000365	0.5718	0.4782	0.4742	0.7505	0.6201	0.726
Unigene0000366	0.6251	2.7445	2.7914	0.2393	0.9228	0.3623
Unigene0000367	1.7753	0.3977	0.2548	0.7281	0.8825	0.882
Unigene0000368	3.2054	1.9589	2.7527	3.0205	4.1597	3.5253
Unigene0000369	6.8744	3.9334	6.8397	8.7259	7.8843	6.9906
Unigene0000370	18.5041	16.9778	26.3846	23.4074	13.474	24.2121
Unigene0000371	123.342	239.578	147.575	141.018	140.537	138.749
Unigene0000372	1.6947	0.9697	1.2427	1.1882	1.9486	1.5579
Unigene0000373	1.5058	12.0543	16.0322	1.0012	2.532	2.5725
Unigene0000374	1.1115	2.1413	2.6059	1.4589	2.3105	1.3806
Unigene0000375	0	0.2384	0	0	0.0601	0
Unigene0000376	0.4249	0.3554	0	0.1084	0.7169	0.3284
Unigene0000377	1.7267	2.1038	2.7449	1.4517	1.3067	1.7335
Unigene0000378	3.9276	1.55	4.8309	3.7649	2.9035	3.2303
Unigene0000379	0.5366	0.4356	0.5075	0.7975	1.0784	0.5123
Unigene0000380	1.9333	0.2109	0.3378	0.7723	1.3826	0.7796
Unigene0000381	10.2753	4.792	17.8185	17.1645	13.2305	10.9959
Unigene0000382	5.8846	3.4666	7.5737	6.9034	6.7419	5.7707
Unigene0000383	1.4614	0.4187	0.9668	1.2225	1.5865	1.234
Unigene0000384	0.5714	0	0.7655	0.5469	0.723	0.7729
Unigene0000385	0.9727	0.5197	1.4237	0.9102	0.6153	1.044
Unigene0000386	2.6512	1.3245	2.0296	3.427	2.7519	3.3861
Unigene0000387	0.843	1.5862	1.3619	1.5377	1.9137	0.8336
Unigene0000388	3.0717	0.9066	2.5999	2.5055	2.9382	3.1032
Unigene0000389	22.4746	11.2611	16.7738	14.6689	15.6433	10.6261
Unigene0000390	1.1077	0.765	0.7836	0.9862	0.9764	0.5916
Unigene0000391	240.807	317.086	233.325	305.513	276.442	257.565
Unigene0000392	3.0405	2.6758	3.3269	2.6326	5.3578	3.654
Unigene0000393	7.9784	5.6791	3.3805	6.6483	5.4466	5.0332
Unigene0000394	0.2344	0	0	0	0	0
Unigene0000395	3.3217	3.0813	2.1315	3.1736	3.7084	3.0417
Unigene0000396	2.9668	1.9355	2.6872	1.8929	2.9019	2.6343
Unigene0000397	4.9092	3.004	4.7855	4.5378	4.5955	3.5164
Unigene0000398	0.1913	0.24	0.2563	0.3295	0.4841	1.3306
Unigene0000399	5.1925	2.9482	4.2469	4.2684	4.5644	5.069
Unigene0000400	82.5955	78.405	29.786	48.5596	27.4819	31.2876
Unigene0000401	0.5263	0.3301	0.3525	0.6044	1.1098	0.8135
Unigene0000402	2.7667	0.9399	1.5443	1.9859	2.4796	3.341
Unigene0000403	6.4685	2.4496	3.8279	4.6996	5.196	5.3848
Unigene0000404	1.1624	1.193	0.7078	0.9709	1.0696	0.735
Unigene0000405	14.4835	3.6654	13.8022	8.786	13.4754	10.6786
Unigene0000406	1.1917	0.8248	2.037	0.9911	0.728	1.0481
Unigene0000407	1.4814	1.0998	2.5516	1.5277	1.2624	1.437
Unigene0000408	0	0	0	0	0	0
Unigene0000409	1.1995	0.4514	0.4821	0.6888	0.9865	0.9039
Unigene0000410	3.2612	1.65	3.0701	4.376	3.3114	4.653
Unigene0000411	8.3712	3.4796	8.892	10.5809	7.897	7.5224
Unigene0000412	3.3343	2.5521	2.6877	3.7103	3.9805	3.8435
Unigene0000413	1.0484	0.2192	2.3408	1.0034	2.1003	1.0128
Unigene0000414	5.2001	2.7911	5.4873	4.4137	3.9883	3.576
Unigene0000415	7.0667	3.135	5.1953	6.8785	6.9241	8.7416
Unigene0000416	1.5667	0.5722	1.4878	0.7971	1.355	1.5173
Unigene0000417	0.0645	0.3237	0.3457	0	0.1632	0
Unigene0000418	0.3254	0.898	1.2205	1.121	0.9881	0.7544
Unigene0000419	3.4938	2.0453	1.8155	2.9668	3.0007	3.0438
Unigene0000420	1.2312	3.8895	4.5917	1.1259	1.3847	1.2686
Unigene0000421	3.9752	4.1098	3.5698	0.5017	0.9949	0.8102
Unigene0000422	5.0847	4.2522	4.566	0.9041	0.9258	2.244
Unigene0000423	2.1792	4.5961	6.721	1.4805	2.0453	1.9942
Unigene0000424	1.228	0.2201	0.94	1.2088	1.4428	1.8303
Unigene0000425	7.5786	5.4854	3.5858	6.4517	4.0759	5.9533
Unigene0000426	9.1388	3.9817	8.4952	8.8048	9.0652	8.9444
Unigene0000427	5.0222	2.6738	2.6208	5.818	5.0615	5.3312
Unigene0000428	1.2834	1.2984	0.721	0.2853	1.2572	0.7199
Unigene0000429	0.7109	0.414	0.9524	1.0497	0.8353	0.5592
Unigene0000430	1.8239	0.6673	0.7127	0.4364	1.6347	1.4977
Unigene0000431	5.2291	2.9773	5.4899	4.3762	4.5634	5.0193
Unigene0000432	1.3808	0.4949	0.4624	0.6796	0.8111	0.4002
Unigene0000433	4.7408	2.4779	6.4672	5.2564	3.938	4.8368
Unigene0000434	3.1016	1.3805	2.9487	2.9185	2.228	3.3172
Unigene0000435	0	0.2538	0.3614	0	0.8534	0.7037
Unigene0000436	0.3793	0.7138	1.1011	0	0.48	0.1466
Unigene0000437	0.8748	0.5487	2.1095	1.6075	0.9224	1.4874
Unigene0000438	1.0158	0.8233	0.8165	1.5614	0.6921	1.558
Unigene0000439	163.179	25.5539	162.794	122.698	140.01	152.667
Unigene0000440	1.1575	2.0743	1.7722	0.3038	0.6695	0.4217
Unigene0000441	0.9246	0.8699	0.6193	0.5309	0.7799	0
Unigene0000442	37.0887	31.146	39.3437	37.3812	24.7893	27.4344
Unigene0000443	0.4394	0.1378	0.1472	0.8831	0.417	0
Unigene0000444	1.0603	0.9501	0.6088	1.4787	2.1083	1.756
Unigene0000445	10.4842	3.0675	9.3213	20.9079	15.2314	15.4587
Unigene0000446	1.7993	0.7523	1.7896	2.129	1.8627	1.2325
Unigene0000447	0.7682	0.5353	0.686	0.4901	0.432	0.7915
Unigene0000448	34.3071	15.6491	31.06	34.2384	36.4421	39.5292
Unigene0000449	0.7158	0.7857	0.959	0.4111	0.5661	0.9336
Unigene0000450	2.4571	1.3485	1.543	0.3527	0.9716	0
Unigene0000451	4.0552	2.5056	3.1096	0.7877	1.4858	0
Unigene0000452	0.7075	0.1614	1.5511	0	0.2442	0
Unigene0000453	8.823	6.0369	8.9032	8.4219	6.3792	8.1028
Unigene0000454	0.956	0.9448	1.2031	0.9981	1.5029	0.6717
Unigene0000455	1.1364	0.7676	1.5224	1.4485	0.9165	1.1581
Unigene0000456	1.73	0.1497	0.7192	0.9591	1.8115	1.1756
Unigene0000457	5.374	4.6737	9.3759	4.9069	3.9335	4.283
Unigene0000458	1.951	2.4287	3.751	2.4972	2.2802	2.5553
Unigene0000459	10.8385	8.4215	8.2971	7.6895	10.257	11.5459
Unigene0000460	3.2786	2.0878	2.6073	2.3762	2.0771	2.3037
Unigene0000461	13.324	6.5224	9.0492	11.0898	10.0447	10.3332
Unigene0000462	17.5118	29.5265	16.6214	26.1365	35.4341	23.9172
Unigene0000463	1.1204	0.3123	1.2925	1.1795	0.9057	1.1185
Unigene0000464	0.9876	0.2186	0.0778	0.1334	0.2205	0.202
Unigene0000465	20.4803	13.1252	16.6082	17.1989	17.5371	18.712
Unigene0000466	1.4721	0.7523	1.4609	2.6925	2.6215	1.5802
Unigene0000467	86.1188	202.036	171.717	95.5538	78.7008	86.4398
Unigene0000468	1.1548	1.1745	0.9408	0.6452	1.0663	0.5789
Unigene0000469	0.137	0.1146	0.7952	0.2622	0.3466	0.2117
Unigene0000470	24.7896	1.9485	17.6531	3.8728	18.821	21.6688
Unigene0000471	13.6264	1.0502	9.2602	3.2196	12.14	15.9052
Unigene0000472	1.0603	1.2351	0.6088	0.9568	1.3416	1.317
Unigene0000473	3.2713	1.7587	4.0979	2.5209	2.5444	2.282
Unigene0000474	1.1949	0.5353	0.5717	0.3921	0.7559	0.4947
Unigene0000475	1.1507	0.4124	0.7157	0.6135	0.7799	0.3335
Unigene0000476	0.1938	0	0.6491	0.2226	0.4904	0.2247
Unigene0000477	0.9683	0.5324	0.8174	1.7214	1.4098	1.9375
Unigene0000478	17.3668	5.469	15.6893	18.0603	16.6193	14.4017
Unigene0000479	0.7142	0.6399	0.5467	0.5859	0.8391	1.0054
Unigene0000480	3.3258	1.2947	1.4595	1.778	1.0157	1.5289
Unigene0000481	1.829	1.2488	2.1711	2.1271	1.2596	1.7177
Unigene0000482	3.5818	2.4353	2.3786	1.5664	2.3398	2.4215
Unigene0000483	2.0336	1	2.9424	2.2421	1.8732	2.1878
Unigene0000484	1.4281	0.3445	0.5151	0.3785	1.112	1.4009
Unigene0000485	0.634	0.6628	1.8403	4.1262	1.0696	4.1651
Unigene0000486	106.15	190.59	130.705	120.295	111.493	103.559
Unigene0000487	5.2069	2.5271	5.3977	5.2323	4.4313	5.569
Unigene0000488	1.406	0.7937	0.6592	1.1034	0.8302	0.9236
Unigene0000489	4.6759	4.096	5.2493	5.28	4.4621	5.4661
Unigene0000490	3.3664	2.5628	3.6753	3.755	3.0404	2.9605
Unigene0000491	11.4779	8.4433	14.787	21.674	16.6862	18.1148
Unigene0000492	3.439	2.1591	2.9293	3.7491	3.6932	3.8003
Unigene0000493	0.4316	0.3734	0.8773	2.1195	0.9039	1.6736
Unigene0000494	1.2667	0.6768	1.5713	0.431	0.8904	1.2781
Unigene0000495	0.6966	0.2913	3.5106	0.2667	0.2938	1.4612
Unigene0000496	0.2393	0.4502	0.7212	0.1374	0.6055	0.6934
Unigene0000497	552.423	1124.66	547.128	725.767	654.254	714.961
Unigene0000498	8.8246	4.9282	7.7611	6.2811	7.961	6.9356
Unigene0000499	0.6881	0	0.5377	0.6585	0.2902	1.263
Unigene0000500	0.9783	0.775	1.5175	0.9461	0.5212	0.2984
Unigene0000501	7.733	7.3786	8.8018	8.8975	7.5836	7.594
Unigene0000502	3.4234	0.3067	1.556	0.8425	0.8509	0.2835
Unigene0000503	3.0808	2.4718	2.8702	5.0288	3.443	3.7165
Unigene0000504	13.3147	13.9184	17.1237	16.2086	21.3394	14.2004
Unigene0000505	52.0262	15.5142	32.0442	17.6436	26.122	17.9841
Unigene0000506	0.5571	0.6988	0.3732	0.1066	0.1175	0.3229
Unigene0000507	0	0	0	0.1888	0	0.0953
Unigene0000508	0.7925	0.7732	1.5041	0.6068	1.1421	1.0208
Unigene0000509	1.2328	1.482	0.9864	1.2389	1.4299	0.8535
Unigene0000510	1.0848	0.4665	0.4567	1.139	1.0196	0.8623
Unigene0000511	9.4111	5.8086	12.1692	8.0317	7.2094	6.7436
Unigene0000512	24.4172	10.673	17.4687	17.384	14.3958	16.0798
Unigene0000513	0.1782	0.559	0	0.8188	0.4511	0.1033
Unigene0000514	3.0979	0.7138	4.6583	1.4521	3.9197	1.6124
Unigene0000515	2.0927	0.711	1.6938	1.3519	0.8275	0.7581
Unigene0000516	0.1489	0.7473	1.0974	2.3091	0.2827	0.7769
Unigene0000517	0.666	0.1193	0.701	0.5463	0.8727	0.5239
Unigene0000518	18.8544	5.5855	11.0632	10.1633	11.7692	9.5087
Unigene0000519	1.3762	0	0.9218	0.7902	0.8706	0.5983
Unigene0000520	1.2509	0.6538	1.412	1.3035	1.3922	0.8324
Unigene0000521	272.57	461.056	299.75	428.005	362.77	353.32
Unigene0000522	26.2334	8.561	23.6527	33.7818	27.0625	26.0133
Unigene0000523	32.0021	38.2466	33.3132	34.0581	30.8872	34.5702
Unigene0000524	4.3286	1.9237	3.5621	3.6502	3.2444	3.4313
Unigene0000525	0.7316	1.606	1.7968	1.0502	1.1571	0.7774
Unigene0000526	0.6918	0.8678	0.4278	2.2002	1.2793	1.3572
Unigene0000527	0.9996	0.1115	0.982	0.9184	1.0399	1.0815
Unigene0000528	1.1855	0.5577	0.2482	0.6807	0.5156	0.5583
Unigene0000529	1.0103	0.3621	0.145	0.9117	0.1826	0.5438
Unigene0000530	131.98	36.6684	120.764	135.779	167.238	132.933
Unigene0000531	14.3024	3.9422	8.7639	9.649	9.9004	10.0374
Unigene0000532	1.6992	0.5542	1.5024	1.405	1.6339	1.3788
Unigene0000533	5.1304	2.3141	4.4737	5.7682	4.3105	4.1679
Unigene0000534	8.5931	3.1664	7.7812	7.1381	5.378	5.3238
Unigene0000535	0.0841	0	0	0	0.0532	0.1462
Unigene0000536	2.6748	1.1184	2.3004	3.1477	1.922	2.2203
Unigene0000537	13.5596	7.4948	12.3876	18.0159	17.7753	20.019
Unigene0000538	14.4443	12.1568	10.9363	8.3119	5.3891	9.7141
Unigene0000539	0.4713	0.1971	1.2102	0.6766	0.8448	1.07
Unigene0000540	0.9826	0.2929	0.8341	0.972	0.7632	0.891
Unigene0000541	24.6354	17.2139	26.7119	20.8435	20.4315	22.2447
Unigene0000542	1.0279	0.9102	1.0531	2.361	1.3771	1.6122
Unigene0000543	1.9888	3.4139	1.9632	3.366	3.9733	2.791
Unigene0000544	12.9614	10.5915	13.8424	15.4717	12.5542	11.6927
Unigene0000545	243.687	345.496	277.738	284.774	232.059	224.829
Unigene0000546	7.6409	3.8747	5.227	7.2815	8.6394	9.6117
Unigene0000547	22.8877	9.2789	12.9313	19.5805	17.6695	20.5726
Unigene0000548	0.1279	0.1604	0.257	0.8079	1.0519	0.2224
Unigene0000549	0.137	0.5155	0.1835	0	0.6933	0.3176
Unigene0000550	1.6467	0.6394	1.2606	2.3864	1.9347	1.7271
Unigene0000551	0.8077	0.6976	1.1175	3.026	1.5078	2.241
Unigene0000552	0.4634	0.1938	0.138	0.8278	0.1303	0.7163
Unigene0000553	0.1455	0	0	0.3342	0.1841	0.1687
Unigene0000554	0.6222	0.4336	0.0926	0.397	0.5248	0.6411
Unigene0000555	0.9231	0.6948	1.385	2.5867	1.822	1.6266
Unigene0000556	0.5865	0.3066	1.0477	0.9543	0.9895	2.2666
Unigene0000557	0.4623	0.5799	0.4129	2.1238	1.1699	0.3573
Unigene0000558	0.5097	0.3443	0.9454	0.7655	1.0914	0.5909
Unigene0000559	1.7682	0.6654	2.0135	2.5384	2.6848	3.4847
Unigene0000560	11.8769	8.669	16.0972	20.5463	17.5177	18.2305
Unigene0000561	7.8563	2.5168	7.5131	7.2041	7.356	6.4874
Unigene0000562	0.5891	0.6898	1.0523	1.1277	1.1927	0.7285
Unigene0000563	22.3067	30.2289	28.9545	26.2152	23.106	23.1126
Unigene0000564	154.472	239.441	180.386	255.009	195.625	151.394
Unigene0000565	61.6117	23.7723	22.8004	49.6764	53.6416	38.6165
Unigene0000566	1.4848	0.9061	1.5052	2.9955	1.3709	1.3026
Unigene0000567	0.5183	0.2364	0.7574	1.2445	1.6692	1.6386
Unigene0000568	8.8932	2.2732	8.1989	4.3697	2.6764	4.9567
Unigene0000569	148.129	326.746	503.842	131.427	134.857	149.004
Unigene0000570	0.744	0.3246	1.2134	0.7059	0.9823	0.9
Unigene0000571	0.6349	0.9532	1.2886	1.2704	1.2779	1.2043
Unigene0000572	0.9429	1.1278	0.8519	0.617	0.8601	0.9278
Unigene0000573	15.1607	2.7694	6.5551	7.1119	8.6032	7.1427
Unigene0000574	3.6694	5.6989	6.9055	6.7225	6.5221	6.482
Unigene0000575	1.0731	0.5769	0.7188	1.2765	1.1639	0.7109
Unigene0000576	3.3897	3.309	3.3925	2.2948	2.6284	2.0106
Unigene0000577	1.3315	0.4283	1.2806	1.0194	1.4255	1.1477
Unigene0000578	0.4642	0.3494	0.3732	0.6398	0.3524	0
Unigene0000579	1.5317	1.2064	2.7677	2.9862	1.4422	1.5691
Unigene0000580	0.197	0.4941	0.1759	0.377	0.8307	1.6744
Unigene0000581	0.437	0.9396	1.8397	1.3262	1.1847	0.6513
Unigene0000582	1.9227	0.201	0.4293	0.184	0.9123	0.0929
Unigene0000583	4.4299	1.9921	4.8148	12.9106	8.1168	8.0907
Unigene0000584	0.727	0.9599	0.6663	0.6591	0.9682	0.8871
Unigene0000585	1.6824	2.6128	0.9659	0.736	0.7096	0.6501
Unigene0000586	23.4098	7.4831	22.3162	23.8486	16.1281	20.2453
Unigene0000587	3.3634	1.1785	1.9634	1.9853	2.2111	1.307
Unigene0000588	0.6233	0.6255	0.4454	1.2409	0.631	0.6263
Unigene0000589	0.8593	0	0.9009	1.5017	0.3309	0.9961
Unigene0000590	8.0029	6.8721	7.2715	7.2193	6.8039	7.5508
Unigene0000591	5.5478	3.2413	3.5634	6.7204	5.7695	5.5503
Unigene0000592	1.4684	0.8561	1.9394	1.4013	1.4392	1.0549
Unigene0000593	8.209	9.22	11.4878	13.729	12.2753	10.0551
Unigene0000594	1.1542	0.3447	1.2701	2.5564	0.9736	1.2903
Unigene0000595	1.9967	0.7292	2.167	1.6255	1.3751	1.465
Unigene0000596	5.8618	2.7011	2.8847	6.1137	4.5409	5.0619
Unigene0000597	4.6771	4.7658	6.9598	5.8837	6.7009	6.4063
Unigene0000598	3.1222	2.5268	3.4631	2.8917	3.993	4.4562
Unigene0000599	1.5484	0.4492	1.2057	1.9228	2.449	3.7808
Unigene0000600	0.8565	0.0651	0.9736	2.5038	1.1494	0.6619
Unigene0000601	3.0109	2.0516	2.1911	2.9028	2.1635	1.6806
Unigene0000602	1.3672	1.5831	1.4089	1.691	1.0646	1.7069
Unigene0000603	1.5673	0.3991	1.3201	2.0762	1.1192	1.3852
Unigene0000604	4.6063	0.6178	2.4062	4.0091	5.535	4.6178
Unigene0000605	2.0111	1.4716	4.2262	1.5284	1.9584	1.7714
Unigene0000606	0.8972	0.4502	1.4424	1.9234	0.3027	1.0401
Unigene0000607	1.7115	0.4442	1.9766	1.22	2.2403	1.7789
Unigene0000608	0.6195	0.9538	0.6979	2.1507	1.6034	1.9914
Unigene0000609	2.8667	1.6544	2.5391	2.6211	2.3981	2.1789
Unigene0000610	4.0254	1.0358	1.7975	0.4741	1.1754	1.4358
Unigene0000611	5.0623	2.5193	5.1141	4.7844	5.9852	5.4068
Unigene0000612	1.4873	1.7911	3.1084	3.6212	2.4841	2.4139
Unigene0000613	1.3201	0.6713	1.0515	2.7862	1.1737	1.8612
Unigene0000614	0.8557	0.0716	0.9935	0.8517	0.5774	0.6613
Unigene0000615	1.8019	1.1793	2.1428	1.8595	1.6604	1.7483
Unigene0000616	6.1854	1.9857	5.2624	5.8242	4.3397	3.8741
Unigene0000617	1.7566	0.7682	1.8279	2.042	1.7808	2.1671
Unigene0000618	0.6572	0.0485	0.3108	1.332	0.8316	0.4034
Unigene0000619	0.1734	0	0.1548	1.5928	1.1699	0.9379
Unigene0000620	1.5138	0.4747	1.4288	0.9878	1.5236	1.4757
Unigene0000621	3.7382	3.6021	2.2991	3.2198	2.1069	2.1274
Unigene0000622	1.7761	0.865	1.2597	2.0638	1.4806	2.059
Unigene0000623	1.7818	2.2351	1.519	0.6511	2.2544	1.4083
Unigene0000624	7.2604	8.5199	6.3536	11.5658	7.7789	9.7064
Unigene0000625	0.5385	1.031	1.4428	1.2368	0.9682	0.9856
Unigene0000626	18.3761	13.8747	17.626	26.7668	21.2859	25.6985
Unigene0000627	14.1345	11.8366	11.1197	11.2788	9.3614	9.1307
Unigene0000628	2.165	0.7544	0.4834	0.4144	0.3044	0.4183
Unigene0000629	10.6604	6.2176	8.2242	9.8855	10.0775	8.6409
Unigene0000630	2.698	2.4537	2.5301	2.7112	1.7922	2.5022
Unigene0000631	3.6404	1.3946	3.0663	2.904	3.1351	2.7882
Unigene0000632	0.975	0.7338	1.0972	0.9854	0.1974	0.633
Unigene0000633	3.137	1.3845	3.5021	3.4692	4.9247	3.5692
Unigene0000634	0.7199	0.425	0.6241	0.4377	1.1789	0.0982
Unigene0000635	6.5498	5.711	6.8288	5.7257	6.3083	6.8644
Unigene0000636	0	0.119	0	0	0.06	0.1099
Unigene0000637	7.8184	0.7635	3.1987	1.5592	2.1325	0.9769
Unigene0000638	11.6795	4.3953	6.1544	3.398	6.6993	6.499
Unigene0000639	27.9324	8.2786	12.7341	5.9552	16.9502	8.9313
Unigene0000640	26.3203	6.7039	11.3162	5.9614	14.763	8.7256
Unigene0000641	0.4742	0	1.5245	1.0891	0.12	0.4397
Unigene0000642	0.6164	0.7732	1.3513	0.7401	0.4963	0.812
Unigene0000643	8.2381	4.0549	8.3503	3.3599	4.6121	6.0874
Unigene0000644	1.2823	0.0447	1.0975	0.9409	0.676	0.4542
Unigene0000645	1.1816	0.6091	1.3661	1.0967	1.1264	0.6943
Unigene0000646	1.6712	0.6186	0.6973	0.3776	0.624	0.6352
Unigene0000647	0.5568	0.4989	0.5683	2.1314	1.4425	1.2909
Unigene0000648	16.0468	6.1501	11.132	13.1008	16.6944	14.0493
Unigene0000649	2.1005	1.4922	2.1727	2.8062	2.7888	2.5759
Unigene0000650	23.1223	16.4553	24.5049	23.3931	25.1326	21.9809
Unigene0000651	6.3749	9.1608	13.8373	11.8622	10.006	10.1966
Unigene0000652	12.9527	14.9942	21.2425	16.5351	15.9787	14.6711
Unigene0000653	0.2361	0	0.2108	0	0	0.5473
Unigene0000654	1.3521	0	0.2131	1.0961	2.0128	0.461
Unigene0000655	19.4771	1.7854	12.6885	17.4008	17.684	22.1926
Unigene0000656	10.4855	3.7785	11.1866	12.655	9.5524	12.5975
Unigene0000657	7.0573	0.9917	6.4691	7.9446	8.2087	8.3924
Unigene0000658	12.7548	6.5373	11.1237	9.9588	8.35	8.6846
Unigene0000659	0.3467	0.3262	0.871	0.5973	0.8774	1.7083
Unigene0000660	0.6207	0.584	1.1434	1.2475	0.4909	0.8095
Unigene0000661	0.5261	0.12	0.3844	0.4394	0.6051	1.3306
Unigene0000662	1.2328	1.3086	2.795	2.6139	1.9199	0.7146
Unigene0000663	0.4835	0.1213	0.1295	0	0.4894	0
Unigene0000664	3.0845	0.9623	1.6272	3.5516	3.1647	3.3349
Unigene0000665	0.7217	0.5281	1.3293	1.2432	1.2936	2.0566
Unigene0000666	0.7158	0.0748	1.0389	0.0685	0.151	0.3458
Unigene0000667	3.3183	1.5609	2.7784	0.9527	2.6241	2.0436
Unigene0000668	0	0	0	0	0	0
Unigene0000669	1.7612	0.5155	0.4719	1.8204	0.2228	1.2931
Unigene0000670	1.6035	1.4008	1.3809	1.3154	1.7028	1.4605
Unigene0000671	0.8219	0.2455	0.2622	0.6293	1.139	0.9982
Unigene0000672	1.1586	0.2236	1.1939	0.5118	0.5638	1.0331
Unigene0000673	0.4351	0.2339	0.4996	1.0708	0.6292	0.9368
Unigene0000674	0.569	0.3059	2.3957	1.3069	0.9257	1.5077
Unigene0000675	0.5739	0.18	0.6407	0	1.3313	0.7762
Unigene0000676	1.2207	0.875	2.2194	0.5007	1.7101	1.3141
Unigene0000677	0.3188	0.24	0.1709	0.1465	0.1614	0.2957
Unigene0000678	0	0	0	0	0	0
Unigene0000679	5.2547	1.6225	4.332	2.4603	4.9098	3.5613
Unigene0000680	0.3579	0.5388	0.5754	0.9043	0.5434	0.3319
Unigene0000681	10.9385	5.6297	9.0273	6.8221	10.7942	9.6318
Unigene0000682	5.3851	3.091	5.1557	3.752	4.7994	4.67
Unigene0000683	14.2636	6.5919	11.988	10.6217	14.894	11.6965
Unigene0000684	6.0967	2.8558	6.4372	4.6394	7.8081	5.3008
Unigene0000685	1.0242	0.2379	0.6606	0.7842	1.2479	0.3078
Unigene0000686	3.735	3.9081	4.8083	4.394	3.942	3.5272
Unigene0000687	102.658	155.991	102.495	93.3727	89.8452	88.8474
Unigene0000688	0.8102	0.1767	0.8494	1.8204	0.6685	0.98
Unigene0000689	4.6025	1.629	3.3259	4.6825	4.5307	4.14
Unigene0000690	0	0	0.2765	0	0	0
Unigene0000691	4.4689	3.5518	3.2448	3.0559	3.3236	3.1835
Unigene0000692	2.3048	2.1293	3.8178	1.4307	2.0098	2.04
Unigene0000693	4.5547	1.3287	1.7028	2.7979	2.2784	2.3638
Unigene0000694	2.8726	1.3851	0.8899	1.7423	2.2035	1.2488
Unigene0000695	3.1087	2.4597	3.3637	3.2131	3.8728	4.7403
Unigene0000696	1.5411	0.6766	1.3419	1.5043	1.2674	0.5359
Unigene0000697	3.8531	2.7523	3.0111	2.6428	3.1373	3.6603
Unigene0000698	1.3913	0.7854	1.9105	1.478	0.6161	1.3306
Unigene0000699	0.5161	0.5179	0.8296	0.1185	0.3918	0.5983
Unigene0000700	6.6942	15.5619	1.4809	1.7163	0.9843	1.4476
Unigene0000701	0.0928	0	0.2488	0	0.7049	0
Unigene0000702	0.8576	1.3448	0.9335	0.4309	0.1356	0.5592
Unigene0000703	1.0295	0.7892	2.222	1.7078	1.6644	1.3924
Unigene0000704	3.435	10.2592	19.5026	7.4514	7.7267	6.2575
Unigene0000705	49.3931	29.7498	65.7741	67.1979	49.4616	61.4992
Unigene0000706	2.6542	0.5413	2.0452	2.5497	2.6891	2.8282
Unigene0000707	0.7541	0.473	1.371	0.3711	0.7497	0.3746
Unigene0000708	2.3814	1.7695	4.1047	2.8568	2.3798	2.3914
Unigene0000709	0.5015	0.7863	0.6718	0.432	0.6345	0.3634
Unigene0000710	0.6786	0.3405	1	0.7794	0.1717	0.3147
Unigene0000711	0.804	0.353	0.8078	0.3694	0.7376	0.3961
Unigene0000712	0.4645	0.1942	0.6914	0.4741	1.306	0.6581
Unigene0000713	52.0642	29.4387	43.879	52.7568	50.0449	55.6363
Unigene0000714	4.9826	2.5239	4.6456	5.4504	4.1481	5.7762
Unigene0000715	1.627	0.239	1.2567	1.5486	1.8546	1.3933
Unigene0000716	0.5021	0.126	1.4797	0.2306	0.3812	0.582
Unigene0000717	0.8257	0	1.7975	0.7112	0.3918	0.9572
Unigene0000718	1.9311	0.8211	1.7977	1.3156	2.609	1.9351
Unigene0000719	3.3839	1.6979	2.1951	2.9453	3.5605	3.4686
Unigene0000720	0.7435	0.574	1.9921	1.1823	1.1579	1.2597
Unigene0000721	6.1598	4.4419	3.7676	4.2497	2.161	4.039
Unigene0000722	0.6627	0.1419	0.433	1.1694	0.9816	0.8806
Unigene0000723	4.6448	1.6178	4.526	5.1464	4.9783	4.9349
Unigene0000724	10.1301	4.6943	8.2458	8.5574	11.2531	7.7596
Unigene0000725	0.779	0.3409	0.4368	0.6241	1.169	0.714
Unigene0000726	1.7158	0.1913	1.6346	0.7882	0.6272	0.5746
Unigene0000727	0.8737	0.1461	0.3901	0.602	0.2211	0.9453
Unigene0000728	1.5032	1.1949	3.1703	2.1024	1.9585	2.3465
Unigene0000729	0.5944	1.3256	1.0617	1.0619	0.4178	0.6891
Unigene0000730	1.1507	0.4124	0.3303	0.7551	0.8319	0.4764
Unigene0000731	23.1434	12.6216	23.8198	32.9393	22.3864	23.7789
Unigene0000732	37.7884	17.1111	33.4636	35.0113	32.9722	32.3089
Unigene0000733	0.9648	0.6051	1.6157	1.2004	1.0173	0.1864
Unigene0000734	1.4243	0.7147	0.9922	0.458	0.793	0.4954
Unigene0000735	3.6704	2.444	4.1001	3.3167	2.6302	2.1075
Unigene0000736	0.5749	0.2885	1.6944	0.4622	0.8002	0.7998
Unigene0000737	1.4138	0.4627	0.5765	1.5531	0.3889	0.6414
Unigene0000738	1.1549	1.1383	2.0998	1.2316	0.3653	1.2911
Unigene0000739	8.2883	7.8256	2.746	11.5656	8.2317	8.2652
Unigene0000740	1.2717	0.1063	0.2839	0.3164	1.1263	0.86
Unigene0000741	80.2236	55.1027	72.3278	116.741	103.839	99.3136
Unigene0000742	7.6503	2.1055	6.6037	5.377	4.2251	5.7759
Unigene0000743	1.1632	0.3929	0.5394	0.7193	0.3963	0.4668
Unigene0000744	0.8476	0.6283	3.2	0.7079	1.5111	1.0719
Unigene0000745	2.0816	1.6513	2.7958	2.0526	2.038	1.9975
Unigene0000746	3.9405	1.1707	1.8059	1.7863	1.0497	1.5628
Unigene0000747	7.7366	5.832	7.9082	6.8054	7.5952	7.1739
Unigene0000748	67.9324	39.4732	55.2744	75.8472	70.2924	68.4502
Unigene0000749	16.5615	5.9122	8.331	13.8627	10.3036	12.8096
Unigene0000750	14.8715	8.2889	14.9058	18.5185	14.0587	13.5265
Unigene0000751	2.3219	0.8117	1.9122	1.4426	1.9024	1.8533
Unigene0000752	3.6745	1.5491	3.7148	2.8191	3.4415	2.9247
Unigene0000753	0.8971	0.1777	0.8223	1.0845	0.5377	1.2042
Unigene0000754	0.6425	0	0.5297	0.4541	0.1251	0.1719
Unigene0000755	0.3399	0	0.4554	0.2231	0	0.2815
Unigene0000756	7.6027	2.2968	6.7101	5.9199	2.216	4.8682
Unigene0000757	4.826	2.2161	4.214	5.1465	4.5525	4.5207
Unigene0000758	0.9549	0.1916	0.2558	1.2282	1.2082	1.6826
Unigene0000759	1.4172	0.6953	1.3534	1.7968	1.7577	1.2606
Unigene0000760	31.7467	19.7135	18.4538	35.6429	30.3335	31.6499
Unigene0000761	2.548	8.2059	6.8754	4.462	6.265	4.4621
Unigene0000762	1.1096	0.288	0.3588	0.9227	0.2905	0.4879
Unigene0000763	2.385	0.3902	2.3616	2.62	1.4433	0.7213
Unigene0000764	1.8255	1.2165	1.987	3.2102	2.2376	2.9098
Unigene0000765	7.4703	7.1659	3.3359	3.3644	4.448	6.113
Unigene0000766	2.812	19.9205	18.1643	8.4241	2.2617	3.6769
Unigene0000767	5.808	5.8423	5.5053	7.2365	4.7837	3.1125
Unigene0000768	7.5401	8.4587	7.4732	5.6321	10.7814	9.3095
Unigene0000769	0.8397	1.7555	3.9638	0.7347	0.8601	0.6489
Unigene0000770	1.0382	0.5535	1.3908	2.0269	0.821	1.2336
Unigene0000771	7.5825	3.5778	8.5738	6.551	4.2249	3.629
Unigene0000772	0.4789	0.1001	0.1069	1.7418	0.808	0.3701
Unigene0000773	16.0617	916.451	748.011	61.2723	12.0294	12.7071
Unigene0000774	1.1419	0.2387	1.1218	0.4809	1.3485	1.5444
Unigene0000775	77.7042	71.4034	68.2343	88.1058	81.6495	75.8694
Unigene0000776	2.1603	2.3124	2.5471	1.3752	1.839	1.6849
Unigene0000777	1.4794	0.866	1.0075	1.1327	0.8267	1.1433
Unigene0000778	1.6188	1.2692	1.4458	0.6972	1.2802	0.9383
Unigene0000779	0.1436	0.2703	0.6735	0.3299	0.5452	0.2498
Unigene0000780	0.5926	0	0.1764	0.1512	0.3333	0.458
Unigene0000781	0	0	0.4556	0.3906	0	0
Unigene0000782	166.692	208.495	182.867	175.436	179.75	154.992
Unigene0000783	0.5069	0.2826	0.7545	0.5175	0.2138	0.9141
Unigene0000784	2.5758	2.3197	2.8313	1.5928	2.5905	2.1438
Unigene0000785	0.9936	0	0.5916	0.2536	0.1397	0.256
Unigene0000786	1.191	0.6291	2.2674	1.2239	1.9036	1.1627
Unigene0000787	0.8959	0.3458	0.277	0	0.1744	0
Unigene0000788	3.926	1.2893	2.9571	2.7478	3.3046	2.4221
Unigene0000789	1.0468	0.8535	0.7713	1.6229	1.5893	1.9415
Unigene0000790	1.046	0.9373	0.8008	0.6007	0.0945	0.1732
Unigene0000791	1131.59	818.215	1163.61	1088.13	1332.91	1039.9
Unigene0000792	20.0783	10.2062	20.5223	17.1408	15.254	14.4677
Unigene0000793	5.1515	3.5542	4.3531	7.2132	5.766	7.2812
Unigene0000794	1.4001	0.4391	0.9378	0.7236	1.1515	0.8927
Unigene0000795	16.3895	6.1177	13.2127	16.2822	23.2149	18.3693
Unigene0000796	2.3101	0.7025	1.9225	1.4873	1.8601	2.5157
Unigene0000797	2.0121	1.0096	2.0795	2.1788	1.6003	1.9327
Unigene0000798	1.2395	0.6005	1.0421	0.7166	0.822	0.6342
Unigene0000799	1.9517	1.8135	0.6779	0.8301	2.4694	1.2569
Unigene0000800	1.4984	0.7161	0.478	1.1472	0.9028	1.1581
Unigene0000801	15.3412	20.4717	9.5149	20.9537	15.5368	13.686
Unigene0000802	5.3252	2.333	5.7924	5.2394	6.1144	4.2568
Unigene0000803	2.7957	3.0686	3.4332	2.408	3.3163	3.376
Unigene0000804	0.9179	0.8128	1.0127	1.1161	1.4346	0.8763
Unigene0000805	1.6921	1.0091	1.3749	1.9751	1.6847	1.7365
Unigene0000806	1.4218	0.8168	2.4922	1.2666	0.8407	1.5558
Unigene0000807	0.5227	0.9537	0.7002	1.0369	0.962	0.661
Unigene0000808	1.9357	1.7934	1.8135	1.0171	1.1206	1.1733
Unigene0000809	0.0555	0.348	0.3716	0.3186	0.4914	0.1929
Unigene0000810	1.1569	0.6267	0.8454	0.7549	1.2642	1.2497
Unigene0000811	3.6613	4.0607	3.5292	2.3588	4.4066	3.5198
Unigene0000812	4.1009	1.427	2.766	1.9739	2.9147	2.224
Unigene0000813	8.7606	7.9696	9.5297	6.1738	6.9852	6.274
Unigene0000814	5.7616	3.607	3.623	3.6951	1.7447	3.2838
Unigene0000815	1.9127	1.3725	1.8893	2.2898	1.6203	1.5597
Unigene0000816	6.3799	4.6395	4.8309	5.4156	3.3928	5.7525
Unigene0000817	3.053	1.4184	1.3634	1.5908	0.7869	1.5402
Unigene0000818	9.948	4.3645	6.8714	7.4758	8.9805	7.8208
Unigene0000819	0.9627	0.0604	0.8383	0.9951	0.7309	0.5022
Unigene0000820	3.135	2.9302	2.7999	4.1299	3.0334	2.993
Unigene0000821	0.6451	0.2428	0.8642	1.6299	0.653	0.2243
Unigene0000822	2.5905	1.4095	3.345	2.7242	2.409	2.0986
Unigene0000823	2.4791	1.8204	2.6326	2.4478	2.4674	1.8576
Unigene0000824	2.4102	2.3483	4.4515	2.9382	2.4673	1.9984
Unigene0000825	5.6266	4.1219	5.4121	5.9448	4.4709	4.4876
Unigene0000826	3.4105	1.9373	3.4359	2.1853	3.5359	3.7938
Unigene0000827	1.7577	1.1504	1.7277	1.0642	1.7164	1.1296
Unigene0000828	1.7196	0.1284	1.0421	1.0345	0.5699	0.7832
Unigene0000829	7.5827	3.7326	6.1335	7.1193	5.793	10.6276
Unigene0000830	13.8101	9.1087	13.3643	12.3529	11.0767	11.6826
Unigene0000831	1.787	0.7336	0.74	0.3358	0.7811	0.3767
Unigene0000832	3.281	1.4175	3.5747	2.6267	3.2557	2.4778
Unigene0000833	0.8727	0.2346	0.2505	0.9306	0.4732	0.3613
Unigene0000834	4.2754	1.3195	4.9548	4.0917	5.109	4.4842
Unigene0000835	41.4772	47.4887	39.9677	37.8769	34.8315	33.3027
Unigene0000836	32.9899	54.5565	64.5344	16.7803	32.9023	33.6918
Unigene0000837	3.2174	1.7415	3.4836	2.8092	2.3701	2.5291
Unigene0000838	6.5048	10.4523	8.4636	8.2637	6.883	5.6889
Unigene0000839	0	0.145	0.0774	0.1327	0.7312	0.402
Unigene0000840	0.4506	0.6359	0.1509	0.3881	0.4989	0.5223
Unigene0000841	5.3334	1.8154	3.2314	4.4014	4.578	3.4798
Unigene0000842	2.5553	1.3041	3.1889	2.505	2.8767	2.416
Unigene0000843	11.8919	10.7884	8.819	12.0719	10.6133	11.0779
Unigene0000844	10.8568	12.1643	10.5847	9.7267	10.4574	9.9238
Unigene0000845	0.8219	0.6628	0.3146	1.4158	0.5942	1.225
Unigene0000846	1.5021	0.5688	1.139	0.4557	0.7889	0.69
Unigene0000847	5.6092	2.8329	7.8103	6.5545	5.1482	6.1041
Unigene0000848	0	0	0.0895	0	0	0
Unigene0000849	7.9428	5.5507	9.0401	8.3087	11.1137	7.4637
Unigene0000850	1.7303	0.537	0.8125	1.4545	1.2865	1.9852
Unigene0000851	1.8475	0.4427	1.2514	1.3351	1.8649	1.6123
Unigene0000852	23.3043	14.9093	17.1733	20.3304	20.3998	21.8541
Unigene0000853	36.334	20.6277	27.7467	36.2093	36.3016	34.7842
Unigene0000854	0.9168	0.3721	1.6616	0.898	0.9894	0.7189
Unigene0000855	0.4767	0.5315	0.4257	0.1216	0.9382	0.4298
Unigene0000856	0.4918	0.694	0.4118	0.706	0.8556	1.2471
Unigene0000857	0.2774	1.1599	1.1148	0.8495	0.702	1.1791
Unigene0000858	8.8009	6.0287	14.7899	12.4363	9.7648	9.5327
Unigene0000859	8.4242	6.98	10.1273	9.2419	8.2748	8.4038
Unigene0000860	1.2444	0.2602	0.6251	0.4764	1.2465	1.2021
Unigene0000861	1.1168	0.0609	0.6505	0.725	0.1229	0.6192
Unigene0000862	0.491	4.311	0.57	0.8833	0.352	0.4933
Unigene0000863	4.3536	3.546	7.5739	3.3332	3.5767	3.6801
Unigene0000864	87.0321	33.9353	103.687	23.8073	33.9736	33.2839
Unigene0000865	1.5542	0.5416	1.8508	3.4707	3.0045	2.7777
Unigene0000866	6.18	3.1862	4.375	7.1364	6.8007	5.1267
Unigene0000867	176.234	30.6944	179.316	317.661	111.462	119.45
Unigene0000868	1.4534	0.2721	1.0752	1.0961	1.4821	0.7544
Unigene0000869	0.2539	0	0	0.3499	0.1285	0.2355
Unigene0000870	1.3548	0.136	0.8712	1.4625	0.7542	1.0051
Unigene0000871	0	0	0	0	0	0
Unigene0000872	1.0383	0.9087	0.4529	0.5824	0.9471	0.5039
Unigene0000873	50.8164	51.0614	49.4027	51.8513	51.4168	50.1849
Unigene0000874	13.751	5.7498	13.462	9.9967	10.3725	7.1019
Unigene0000875	0.7652	0.192	0.9226	1.3182	1.065	1.2419
Unigene0000876	1.1478	0.6719	0.8201	1.8455	1.646	1.7742
Unigene0000877	0.2939	0	0	0.1688	0	0.1704
Unigene0000878	3.3518	0.3203	1.5647	2.5142	1.5946	2.7583
Unigene0000879	0.9745	1.5557	1.9582	2.5434	1.8495	2.8241
Unigene0000880	1.5871	1.3031	1.7783	1.6902	1.424	2.0741
Unigene0000881	4.6675	0.2568	1.7003	3.1974	6.0611	2.3257
Unigene0000882	0.7312	0.4786	0.7241	0.4747	1.7297	1.5848
Unigene0000883	1.0135	0.1059	2.1497	0.8729	0.7213	0.8322
Unigene0000884	2.5516	1.5932	3.6039	2.5989	2.6588	2.5832
Unigene0000885	1.8769	1.1079	1.3311	1.7751	1.0477	1.0559
Unigene0000886	0.0533	0.2007	0.0715	0	0	0.1237
Unigene0000887	39.3495	23.3543	30.088	40.1379	36.0074	40.7277
Unigene0000888	19.1746	18.3189	14.5773	16.038	11.5778	12.624
Unigene0000889	4.785	1.4788	2.0438	3.8228	4.6504	3.2157
Unigene0000890	2.1964	0.8867	2.1645	2.5804	2.4596	3.0437
Unigene0000891	1.9781	1.5377	4.8521	2.5757	2.1504	1.954
Unigene0000892	19.361	35.986	24.817	17.1378	19.4512	16.4792
Unigene0000893	0.6875	0.4312	0.2558	0.8334	1.0149	0.6642
Unigene0000894	1.4753	0	0.9059	0.706	1.6334	1.2827
Unigene0000895	0	0.3364	0	0	0	0
Unigene0000896	1.7121	2.6157	4.3226	2.2183	2.2496	1.9593
Unigene0000897	3.5261	1.7816	3.5674	2.8754	3.0363	2.6329
Unigene0000898	1.8526	0.9228	3.0107	2.6943	1.6971	1.4977
Unigene0000899	1.1976	0.3535	2.8313	2.1035	0.8914	1.225
Unigene0000900	0.7582	0.5707	0.4063	0.2322	0.5117	0.7618
Unigene0000901	0	0.1564	0.4175	0.5727	0.0789	0.1445
Unigene0000902	9.2004	9.1532	10.2898	20.5569	13.9546	14.5274
Unigene0000903	4.0067	3.1574	5.2989	5.3684	4.2247	3.8707
Unigene0000904	1.9658	1.9917	1.8232	1.2156	1.8655	1.4024
Unigene0000905	0.381	0.5974	0	0.7656	0.241	1.1041
Unigene0000906	0.4931	1.2372	0.755	0	0.624	0.8983
Unigene0000907	32.6986	40.919	44.6455	42.055	31.5507	27.3919
Unigene0000908	8.0479	4.7814	8.052	5.372	7.4975	6.0918
Unigene0000909	5.0495	3.4095	5.3405	3.4267	3.5002	3.9911
Unigene0000910	2.1115	0.4674	2.2463	2.4011	1.912	2.0398
Unigene0000911	0.2473	0.3877	1.6562	0.213	0.8603	0.1433
Unigene0000912	3.2227	1.1124	1.3908	1.4655	0.9578	2.3068
Unigene0000913	0.1309	0	0	0	0	0
Unigene0000914	3.2629	1.5871	3.323	5.1047	3.0332	4.4194
Unigene0000915	3.5217	1.3839	1.9895	1.6081	3.4359	2.0659
Unigene0000916	2.0057	1.5524	3.173	1.6908	2.8348	2.0036
Unigene0000917	1.1128	0.1642	1.14	0.0752	0.7454	0.6071
Unigene0000918	0.0737	0	0	0	0	0
Unigene0000919	7.4215	4.5166	5.8079	6.6666	4.8346	6.3888
Unigene0000920	16.1282	11.3335	17.7841	18.2037	16.3956	16.1243
Unigene0000921	0.3401	0.0711	0.2278	1.0415	0.4303	0.8542
Unigene0000922	0.7018	0.69	1.8295	1.503	0.9119	1.2753
Unigene0000923	0	0	0	0.1833	0	0.1851
Unigene0000924	0.6974	0	1.6563	0.983	0.4412	1.029
Unigene0000925	29.8556	19.3612	31.4824	26.2369	16.9644	22.7392
Unigene0000926	0.2979	1.588	1.5962	0	0	0
Unigene0000927	0.1378	8.1262	4.6162	0.4749	0.436	0
Unigene0000928	3.5071	2.1353	3.0223	2.9442	2.6988	3.3048
Unigene0000929	6.471	8.2513	8.2664	7.8304	7.5371	6.232
Unigene0000930	8.0538	3.553	5.5432	5.1197	5.4536	6.1958
Unigene0000931	0.1849	0	0.3716	0.2124	0.117	0.1072
Unigene0000932	4.8093	3.8952	6.6458	6.8714	6.0373	4.3022
Unigene0000933	6.1125	4.0838	5.6965	7.7066	4.3714	4.6983
Unigene0000934	0.8609	0.8399	0.6407	0.4394	0.6051	0.8871
Unigene0000935	0.5775	0.1035	0.1105	0.7579	0.4175	0.3825
Unigene0000936	0.4419	0.0792	0.6343	0.0363	0.679	0.2196
Unigene0000937	14.5444	4.43	9.032	9.2623	10.6847	7.9398
Unigene0000938	11.9441	3.6152	5.92	5.1853	6.2396	4.9743
Unigene0000939	5.8715	2.0963	7.6036	5.9996	6.5528	7.6443
Unigene0000940	5.4678	2.7101	6.5389	7.9028	7.8295	5.9675
Unigene0000941	0.346	0.496	0.8607	0.9649	1.6884	0.4584
Unigene0000942	3.7756	2.9963	5.5741	6.3713	5.1672	5.0022
Unigene0000943	17.2816	5.9738	11.6415	13.1373	12.7346	10.1308
Unigene0000944	0.2836	0.1779	0.19	0.4071	0.8971	0.9041
Unigene0000945	6.2402	7.1415	6.8023	6.7345	5.581	4.4791
Unigene0000946	2.674	0.41	1.4232	2.2263	2.3264	2.942
Unigene0000947	2.4614	1.2189	2.6838	2.8464	2.1936	3.0221
Unigene0000948	2.1338	1.5167	2.001	1.8787	2.7898	1.4017
Unigene0000949	3.3206	1.4333	2.1525	4.6747	3.9531	4.2634
Unigene0000950	1.9361	2.3353	1.5962	1.967	2.4498	1.6402
Unigene0000951	0.8176	0.1831	0.4694	1.5761	0.8497	1.2186
Unigene0000952	4.6784	1.7606	3.1964	4.6923	3.8477	3.688
Unigene0000953	2.1947	0.3059	1.8295	0.3361	1.3576	0.5654
Unigene0000954	42.4134	43.1272	47.7618	44.9955	40.145	40.1018
Unigene0000955	0	0.4234	0.113	0.0969	0	0
Unigene0000956	0.9289	0.3884	1.3827	1.4521	1.0448	0.6282
Unigene0000957	1.1629	0.1216	0.3895	0.8903	0.8583	0.7864
Unigene0000958	6.728	5.2689	4.1331	6.3606	3.9037	4.8693
Unigene0000959	5.7068	0.7377	5.1048	6.0991	4.6999	5.4052
Unigene0000960	1.2367	1.3789	1.2885	2.0514	0.7824	1.5929
Unigene0000961	0.9781	0.5368	1.3923	1.3339	0.3868	0.4961
Unigene0000962	0.7456	1.9805	0.7638	1.0073	0.7214	0.4576
Unigene0000963	13.4574	8.8791	18.1622	16.5858	21.1805	16.4609
Unigene0000964	3.4886	5.5917	4.1542	5.2306	8.3376	3.4825
Unigene0000965	4.391	1.8064	2.5301	4.365	5.2871	4.8167
Unigene0000966	7.7344	3.5905	5.4241	7.7312	7.3535	6.5464
Unigene0000967	4.0133	3.1588	4.5331	5.6935	7.0693	6.2033
Unigene0000968	0.478	0.257	0.5488	0.7057	0.432	0.8707
Unigene0000969	2.2297	2.131	1.8492	2.4388	2.7765	1.1898
Unigene0000970	5.9176	1.1732	4.5561	3.9253	3.3565	4.0412
Unigene0000971	4.0271	3.8281	2.4735	3.0486	2.3626	2.6816
Unigene0000972	1.9663	0.2349	1.1289	0.5377	0.1185	0
Unigene0000973	3.9494	1.8558	4.1017	4.7129	5.5831	3.8774
Unigene0000974	3.0261	0.292	1.975	2.6733	2.7489	2.1588
Unigene0000975	0.0831	0	0.4454	0.1909	0	0
Unigene0000976	0	0	0	0	0.2452	0
Unigene0000977	2.0691	0.7756	1.4434	1.5818	1.859	1.7103
Unigene0000978	1.9888	2.6836	2.6731	1.7807	1.6969	1.7974
Unigene0000979	4.2718	1.3508	4.4113	2.7596	2.7757	2.8475
Unigene0000980	178.144	284.94	356.316	156.443	187.668	161.655
Unigene0000981	20.0317	9.9129	13.541	9.5503	14.9401	8.4153
Unigene0000982	2.5676	1.3573	3.2677	5.076	3.8056	3.6781
Unigene0000983	19.943	16.6989	19.7151	21.674	23.0346	21.8417
Unigene0000984	1.8624	1.8215	2.4527	2.4289	1.7973	1.9395
Unigene0000985	1.1308	0.0887	0.7574	0.487	0.7154	0.5735
Unigene0000986	12.5678	7.2243	6.7073	9.1422	11.0479	10.1222
Unigene0000987	8.6775	6.898	15.1256	10.2792	8.3396	9.8109
Unigene0000988	1.9973	1.0869	2.0265	1.6866	1.6538	1.7196
Unigene0000989	0.7259	0.1301	0	0	0.3936	0.4808
Unigene0000990	0.125	0	0	0.1436	0.4746	0.4348
Unigene0000991	0	0.3304	0.3529	0.7562	0.9998	0.6107
Unigene0000992	0	2.4902	1.6147	0	0.2691	0.0822
Unigene0000993	0.3893	0.1221	0.5216	0.8942	0.3694	0.4513
Unigene0000994	3.1448	1.4815	2.9452	3.2112	2.7727	2.3507
Unigene0000995	3.2523	3.3882	5.6335	4.766	3.308	2.8574
Unigene0000996	2.0365	1.7618	2.9164	2.0969	2.6656	3.0121
Unigene0000997	1.1403	1.0728	0.94	0.7555	0.4994	0.6863
Unigene0000998	0.5642	2.359	0.3779	0.6479	1.6657	0.436
Unigene0000999	2.9342	1.2172	3.0487	2.8523	2.8648	2.6649
Unigene0001000	5.507	1.2271	1.2377	0.1872	0.9398	0.672
Unigene0001001	0.5372	0.2073	0.9411	0.3322	1.3072	0.3353
Unigene0001002	12.2261	3.9917	9.76	13.0792	10.7015	9.0281
Unigene0001003	17.2171	6.8828	16.8392	16.3342	14.1533	16.0464
Unigene0001004	5.0248	4.1575	7.1327	5.3326	4.0949	5.069
Unigene0001005	1.4552	0.8149	1.8798	1.3727	0.5261	0.5723
Unigene0001006	21.4027	24.1619	42.0306	25.763	19.5878	21.0414
Unigene0001007	0	0	0	0	0	0
Unigene0001008	4.5979	0.898	4.4261	2.8457	5.2951	4.6918
Unigene0001009	0.3928	0.4927	0.1315	1.1277	1.2424	0.683
Unigene0001010	0.6674	0.2093	0.6706	0.6707	1.4778	2.1277
Unigene0001011	11.0494	14.2658	13.8335	16.2243	13.6691	15.5922
Unigene0001012	1.9886	0.6992	2.6035	2.0589	1.7156	1.3797
Unigene0001013	2.8314	0.7893	2.4207	2.7236	2.4087	2.8428
Unigene0001014	0	0	0	0.1262	0	0.3821
Unigene0001015	5.0333	0.311	2.6241	3.474	3.3255	2.6157
Unigene0001016	1.333	0.1475	0.7353	1.8461	1.6371	1.1817
Unigene0001017	0.9693	0.256	0.4784	0.7616	0.3873	0.1774
Unigene0001018	1.5473	1.2782	1.2134	1.4303	2.0533	1.3125
Unigene0001019	0.7671	0.4124	0.5505	0.8495	0.4853	0.6352
Unigene0001020	0.857	0.2829	1.2689	0.9324	0.3424	1.464
Unigene0001021	16.0067	20.7635	13.4371	20.6507	21.5682	17.3511
Unigene0001022	0.1171	0.0734	0	0	0.0741	0.0679
Unigene0001023	0.5789	1.0166	0.6204	0.8864	0.1953	0.8501
Unigene0001024	5.3235	13.018	9.9763	7.2128	5.8654	7.9395
Unigene0001025	1.8184	0.2534	2.7518	2.011	1.5765	2.7716
Unigene0001026	57.3327	88.2483	120.903	45.393	42.0745	45.7427
Unigene0001027	0.7661	0.2883	0.9579	1.8183	1.5509	1.5394
Unigene0001028	3.5978	1.3398	3.8126	2.9617	4.2322	3.5273
Unigene0001029	1.3915	0.3675	0.4906	0.9252	1.39	0.9339
Unigene0001030	0.2989	0.8435	0.6006	0.6865	1.0399	1.3859
Unigene0001031	13.5984	7.3671	11.9118	10.3855	10.5792	9.9319
Unigene0001032	0.94	1.5722	1.1852	1.016	0.653	1.0042
Unigene0001033	6.1796	4.1664	5.07	10.5466	8.0199	7.1025
Unigene0001034	1.3328	1.4211	2.4997	1.5306	1.2648	2.0086
Unigene0001035	0.7348	0.553	1.2797	0.4219	0.7438	0.6815
Unigene0001036	1.3508	157.399	80.0735	4.543	1.1597	2.6285
Unigene0001037	0.5654	0.3546	0.8521	0.8116	0.5365	0.4096
Unigene0001038	25.7145	22.3977	26.8759	29.7085	27.7768	27.4875
Unigene0001039	0.146	0.641	0.1956	1.5928	0.9236	0.677
Unigene0001040	2.8559	1.6187	4.5769	2.9518	2.8908	2.3052
Unigene0001041	5.3728	2.7222	5.5096	3.8991	3.3437	3.1041
Unigene0001042	3.2058	1.5043	4.1197	3.1635	2.7793	3.3172
Unigene0001043	6.9731	4.3525	5.3359	6.6372	6.1125	6.1565
Unigene0001044	2.1507	1.8394	3.0122	1.9086	2.8449	3.5132
Unigene0001045	9.021	18.9652	13.8958	11.804	6.6019	5.9759
Unigene0001046	1.2169	0.8082	2.0139	2.8774	1.1775	0.9958
Unigene0001047	2.8543	1.2211	4.1333	3.8275	3.5698	3.4045
Unigene0001048	0.3723	0	0.0998	1.4539	0.7538	0.6906
Unigene0001049	0.1465	1.2862	0.4906	0.6729	0.6487	0.5094
Unigene0001050	1.1853	0.2478	0.8822	1.1344	0.25	1.3741
Unigene0001051	4.4816	1.1788	0.8715	1.4942	1.0975	2.5977
Unigene0001052	0.2242	0.2109	0.3003	2.1238	0.0709	0.065
Unigene0001053	2.3024	2.7104	2.7997	1.5865	1.479	2.1968
Unigene0001054	0	0.0998	0	0	0	0
Unigene0001055	0.8133	0.0729	1.4008	0.4003	1.1025	0.9428
Unigene0001056	2.4148	1.6466	3.6497	1.8773	1.6765	1.8949
Unigene0001057	1.9466	0.8953	1.3039	0.6707	1.7241	1.0531
Unigene0001058	1.0597	0.1173	0	0.5727	1.3014	0.4336
Unigene0001059	7.0302	0.6135	5.4052	3.0189	4.0996	3.26
Unigene0001060	0.7879	0.0824	0.7036	0.9048	1.2461	0.9894
Unigene0001061	1.0203	0.8319	0.6492	0.996	0.9682	0.7097
Unigene0001062	3.1343	1.7695	3.1359	2.7389	3.4749	2.7596
Unigene0001063	3.2497	1.6306	2.6121	4.7985	3.5245	4.4131
Unigene0001064	2.9796	1.3436	3.0394	3.8245	2.9692	2.9687
Unigene0001065	424.64	638.217	619.208	396.088	472.402	397.795
Unigene0001066	0.5809	0.3279	0.8561	1.2009	0.9188	0.6398
Unigene0001067	50.7146	55.3929	26.2455	26.8417	33.1366	27.8806
Unigene0001068	2.4078	1.551	0.1744	0.5232	1.4821	0.4526
Unigene0001069	0.4198	0.4514	1.3659	0.551	0.1518	1.0429
Unigene0001070	0.4944	0.0689	1.5453	0.5047	0.695	0.1274
Unigene0001071	5.5924	11.1074	7.0446	7.1719	5.6117	5.6367
Unigene0001072	5.7249	2.9863	4.8219	4.9961	2.9584	4.4026
Unigene0001073	4.2115	3.2771	7.06	4.2935	4.0939	3.8814
Unigene0001074	1.9383	1.377	2.7556	2.4985	2.3148	2.1323
Unigene0001075	1.916	0.9614	3.0102	2.7606	2.1599	1.6356
Unigene0001076	4.3738	2.4025	3.9227	3.7963	4.0894	3.8108
Unigene0001077	2.922	1.7831	4.126	1.6325	2.2982	1.0986
Unigene0001078	6.8391	3.9595	5.8945	6.0967	7.0195	7.0412
Unigene0001079	4.1836	2.7604	4.1306	4.5989	3.9418	4.4717
Unigene0001080	2.5599	1.3396	2.8614	3.8958	2.623	2.3486
Unigene0001081	0.4842	1.0629	1.4054	1.0657	0.4595	0.7016
Unigene0001082	0.733	0.0836	0.8035	0.4592	0.5059	1.2361
Unigene0001083	0.2833	0.3554	1.265	0.3253	0.9559	0.6568
Unigene0001084	5.0311	1.4786	4.5799	3.4515	3.5057	3.8035
Unigene0001085	1.8653	1.1337	1.507	2.3409	2.0438	2.0063
Unigene0001086	6.6457	5.6876	4.3907	4.9542	2.3931	4.5804
Unigene0001087	1.0287	0.1843	0.886	0.2532	0.3719	0.7667
Unigene0001088	0	0.1265	0	0.1158	0	0
Unigene0001089	0.2144	0	0.4308	0.4925	0.1356	0
Unigene0001090	12.9552	12.3632	12.8713	14.1663	13.6469	13.0783
Unigene0001091	7.5685	2.4697	4.5832	2.271	5.7507	5.0108
Unigene0001092	2.1861	1.7856	1.8048	3.8826	2.7982	3.0646
Unigene0001093	1.409	1.0232	2.6823	1.7884	1.1729	1.0101
Unigene0001094	0.1681	2.2143	1.8017	0.2413	0.1064	0.1949
Unigene0001095	1.0058	0.7886	0	0.2166	0.2386	0.1458
Unigene0001096	1.0567	0.482	1.287	1.8755	0.6685	1.1137
Unigene0001097	1.3275	0.5551	2.3119	1.7786	2.0436	1.2055
Unigene0001098	6.8425	3.3861	4.7305	7.696	4.6863	4.894
Unigene0001099	3.7392	1.6563	3.5674	5.2499	4.1977	4.8492
Unigene0001100	1.2007	0.7066	1.4993	1.2428	1.0879	0.8936
Unigene0001101	26.7124	4.9588	20.86	16.1773	20.1026	23.5934
Unigene0001102	2.4972	4.3988	2.9183	2.2577	2.5322	2.2995
Unigene0001103	1.6927	0.2334	0.6916	0.8617	1.1696	1.5865
Unigene0001104	1.2238	1.049	0.9017	0.5622	0.8774	0.4729
Unigene0001105	0.6591	0.1837	0.0981	2.1868	1.4827	1.6131
Unigene0001106	0.06	0.4514	1.3659	0.3444	0.6071	0.4867
Unigene0001107	1.1269	0.3262	1.2774	0.7964	0.329	0.9044
Unigene0001108	0.8692	0	2.5345	1.7616	2.0703	1.3633
Unigene0001109	1.5319	1.0647	0.9706	1.26	2.2002	0.8399
Unigene0001110	11.7972	11.4569	13.5101	18.4378	15.1375	16.6815
Unigene0001111	2.715	1.144	2.6548	2.1426	2.9772	1.9772
Unigene0001112	0	0	0	0	0	0
Unigene0001113	1.7188	1.0395	2.5493	3.5602	3.9224	2.8465
Unigene0001114	16.6366	11.6512	16.2143	15.4822	14.0151	14.5946
Unigene0001115	0.6143	0	0.7201	0.97	1.4573	1.2462
Unigene0001116	1.3812	0.7508	1.0485	0.6345	1.1068	1.4944
Unigene0001117	0.9307	0.5108	1.2468	2.8725	1.6928	1.3824
Unigene0001118	21.7045	16.7732	22.8295	20.9912	20.5744	20.6602
Unigene0001119	0	0	0	0	0	0
Unigene0001120	27.1355	16.0885	30.3152	28.1342	23.3084	23.6456
Unigene0001121	1.9136	0.9679	0.6202	0.8507	1.4449	1.6101
Unigene0001122	1.2601	1.0538	1.8756	2.653	2.1258	1.2984
Unigene0001123	0.7966	0.9279	0.4574	0.2614	0.648	0.1319
Unigene0001124	18.6207	7.1847	13.6187	13.2978	13.9293	13.4807
Unigene0001125	0.1546	0.388	0.4143	0.2664	0.4892	0.0896
Unigene0001126	3.5598	1.7978	3.3445	2.7609	2.9248	3.2693
Unigene0001127	26.2635	8.7709	21.9417	25.7356	28.2865	29.7292
Unigene0001128	25.7027	17.7421	19.0786	13.3867	22.5242	17.9795
Unigene0001129	1.7708	2.0526	5.3752	1.802	1.645	2.8064
Unigene0001130	0.557	0.2206	1.4531	1.4476	0.5935	0.5777
Unigene0001131	2.0599	1.6835	1.9443	2.3119	1.6191	1.4111
Unigene0001132	7.7706	2.2001	5.5851	5.1272	5.364	7.149
Unigene0001133	2.1149	1.0088	1.0375	1.2315	1.3191	0.8978
Unigene0001134	62.5677	17.2434	51.6291	47.779	36.4193	40.7756
Unigene0001135	0.741	0.1957	0.418	1.3885	0.5428	0.9947
Unigene0001136	38.1196	25.0328	64.2592	37.8577	40.7668	32.682
Unigene0001137	510.461	1131.49	404.76	458.138	286.594	410.031
Unigene0001138	14.1634	10.6922	19.9586	10.9282	9.4136	9.7109
Unigene0001139	1.2979	0.0794	0.3817	1.0907	0.5207	0.734
Unigene0001140	0.0909	1.4831	1.7057	3.969	3.107	2.2141
Unigene0001141	1.7585	0.7353	0.7853	0.8174	0.6887	0.9222
Unigene0001142	3.4077	3.9029	4.521	3.4598	3.3119	3.0725
Unigene0001143	1.8413	1.203	1.2847	1.1895	1.6381	1.4786
Unigene0001144	0.7158	0.2449	0.5231	0.6726	1.0704	1.0562
Unigene0001145	5.6829	1.7865	4.6886	3.3389	4.0469	3.4989
Unigene0001146	2.1412	0.8139	0.6954	2.012	3.1198	3.3097
Unigene0001147	9.0035	3.838	10.878	12.034	8.805	11.2586
Unigene0001148	9.4438	2.7311	8.5846	9.5362	6.9783	9.2599
Unigene0001149	0.094	0.3539	0.5039	1.0799	1.4277	1.4171
Unigene0001150	2.3531	1.4759	2.5832	3.0214	2.8119	2.9363
Unigene0001151	0.3752	0.0672	0.7899	0.1847	0.8817	0.4971
Unigene0001152	1.2458	0.586	1.2517	0.2683	0.4926	0.8124
Unigene0001153	2.036	1.9344	2.9858	2.5873	1.8597	1.8575
Unigene0001154	42.5542	41.3632	43.4305	41.8818	37.7693	36.4555
Unigene0001155	1.9453	3.344	2.6061	1.7376	1.0028	1.4199
Unigene0001156	1.1358	0.4384	1.9897	1.6054	0.6633	0.9115
Unigene0001157	1.1657	0.6763	1.2883	1.4223	0.8849	1.0979
Unigene0001158	136.38	81.9735	58.1659	45.2967	77.6278	58.3419
Unigene0001159	15.7736	4.2745	10.8153	8.8863	7.5226	7.1587
Unigene0001160	1.764	0.7081	1.3706	1.094	1.0713	0.5726
Unigene0001161	4.8485	3.7215	2.9978	4.1859	3.8396	3.0265
Unigene0001162	0.9115	1.0114	1.1741	0.7247	0.8428	0.2845
Unigene0001163	0.5824	0.8767	0.3901	1.1371	0.3685	0.8778
Unigene0001164	1.0764	1.9735	2.2186	1.1411	3.0383	1.5358
Unigene0001165	18.58	10.0095	18.399	16.3212	12.941	14.9221
Unigene0001166	0.2615	0.4686	0.3003	0.6007	0.2836	1.0394
Unigene0001167	1.3355	0.5026	0.7156	0.9969	1.0983	0.5677
Unigene0001168	13.9799	2.3841	5.1371	5.6565	7.155	6.5865
Unigene0001169	1.3771	0.4936	1.8449	1.22	1.9416	1.1859
Unigene0001170	466.643	1154.25	1087.36	720.502	531.164	493.019
Unigene0001171	1.409	0.5891	0.3932	0.8765	1.6342	0.6125
Unigene0001172	0.6044	1.733	1.2724	1.8841	0.6555	1.4014
Unigene0001173	4.2785	1.5391	3.9322	2.229	3.1919	2.8264
Unigene0001174	0.5466	2.8111	1.3912	0.3766	0.5533	0.1901
Unigene0001175	2.3902	0.5879	1.6638	0.9957	1.097	1.5484
Unigene0001176	0.4931	0.6186	0.1652	0.7079	0.468	0.929
Unigene0001177	1.8179	0.4622	1.47	1.6833	1.5334	1.7182
Unigene0001178	0.7961	0.5409	0.4444	1.3333	1.1332	1.4997
Unigene0001179	0.9848	0.4941	0.8795	0.6786	0.4154	0.685
Unigene0001180	1.1269	0.3262	0.1161	0.1991	0.2194	0.201
Unigene0001181	134.924	144.863	260.457	105.401	113.349	103.278
Unigene0001182	6.1708	6.5002	7.8429	6.6325	4.4545	5.8696
Unigene0001183	2.2395	0.1277	1.6364	0.9352	2.1896	0.826
Unigene0001184	0.7855	0.4927	1.3154	0.9773	0.1657	0.5312
Unigene0001185	3.3198	5.8018	7.5347	5.3858	2.7731	2.9892
Unigene0001186	2.4735	0.1773	2.3196	4.9915	4.6499	3.1542
Unigene0001187	1.8994	0.3487	1.1792	0.2483	0.5276	1.0562
Unigene0001188	11.0723	4.7204	9.4601	10.5818	9.5423	11.7048
Unigene0001189	1.5269	1.1492	1.7728	2.2212	1.1592	0.9441
Unigene0001190	2.617	1.6119	3.6379	2.4447	1.7396	1.4449
Unigene0001191	0.3726	0.3635	1.2757	0.9034	0.9429	0.336
Unigene0001192	1.7093	0.3346	1.4295	1.3843	1.3627	1.3286
Unigene0001193	2.3609	1.6795	2.3668	1.7469	1.9247	2.1124
Unigene0001194	0	0	0	0	0	0
Unigene0001195	4.9965	1.6037	4.4467	4.5798	3.3985	3.4944
Unigene0001196	1.4175	0.5212	2.1936	1.5156	1.0514	1.4166
Unigene0001197	2.1594	0.5346	1.9413	2.0231	2.229	2.0752
Unigene0001198	2.6266	1.957	2.943	1.3712	2.699	1.4948
Unigene0001199	3.6567	2.5605	3.7435	1.8929	3.8671	2.6953
Unigene0001200	6.5142	5.9778	5.9457	8.0683	5.9779	6.3306
Unigene0001201	3.5843	3.2659	4.5343	4.9435	3.9092	3.5213
Unigene0001202	4.212	1.1277	2.7971	3.2304	3.1646	3.4373
Unigene0001203	18.181	4.3505	13.5999	11.223	10.5822	11.0042
Unigene0001204	1.2257	0.2428	0.7778	0.4445	1.306	0.2243
Unigene0001205	0.0973	0.2442	0	0.1118	0	0
Unigene0001206	6.4039	1.8967	7.6854	7.5077	4.9517	5.9802
Unigene0001207	0.6087	1.1619	1.7018	1.2309	0.7367	0.9971
Unigene0001208	11.0815	15.0325	15.2232	14.4103	12.5228	12.0291
Unigene0001209	1.0987	0.4281	0.9144	0.6309	1.2006	0.7527
Unigene0001210	1.2283	0.8902	1.6089	0.8464	1.3469	0.6961
Unigene0001211	1.3054	0.5848	0.5621	0.7496	0.6489	0.8647
Unigene0001212	3.605	3.2728	3.7396	3.673	3.319	3.545
Unigene0001213	2.5217	2.1691	2.5578	2.3996	1.8688	2.1299
Unigene0001214	3.2317	1.8468	2.4052	2.1856	2.6806	1.9981
Unigene0001215	2.9701	1.2774	1.1369	1.9979	1.6106	1.3281
Unigene0001216	195.983	51.1057	117.229	142.095	175.802	175.348
Unigene0001217	2.539	0.5517	2.0623	1.148	2.5296	1.3442
Unigene0001218	10.8249	1.2286	4.5922	6.4823	5.1526	8.4556
Unigene0001219	1.4391	0.3528	1.3057	1.9682	2.0898	2.4152
Unigene0001220	2.8066	0.9849	2.8169	3.7311	3.22	3.8813
Unigene0001221	7.7239	7.0773	9.7477	9.4743	7.3904	7.2407
Unigene0001222	58.1362	19.9402	47.4343	40.2149	48.3674	46.2017
Unigene0001223	108.653	149.659	113.508	102.839	101.223	107.502
Unigene0001224	17.1955	3.9137	16.052	14.5395	13.4172	14.0238
Unigene0001225	16.6032	6.1519	12.1307	12.1056	11.0777	12.4219
Unigene0001226	0.3866	1.5519	0.4143	0.2664	1.9567	0.8964
Unigene0001227	1.1356	1.5921	2.5057	2.4856	1.7242	1.5643
Unigene0001228	0.3541	0.5923	1.0279	0	0.2987	0.2737
Unigene0001229	0.1	0	0.6696	0	0	0
Unigene0001230	1.6059	2.3808	2.1514	1.1737	2.5861	1.6925
Unigene0001231	2.1347	0.9181	2.07	1.8562	1.9165	1.6498
Unigene0001232	0.4639	0.388	1.6573	1.8648	0.7827	0.986
Unigene0001233	4.7334	3.7026	3.2474	2.2657	3.2703	2.7303
Unigene0001234	1.8146	0.8582	3.7858	2.938	2.8605	2.7243
Unigene0001235	2.3737	4.224	3.9194	0	0.4191	0
Unigene0001236	0.6635	0.4855	0.9877	0.5292	0.8862	0.4273
Unigene0001237	1.5913	0.7909	1.8157	2.9272	2.4742	2.8493
Unigene0001238	3.2224	0.9492	1.9591	1.7771	2.754	2.8682
Unigene0001239	1.0448	1.1533	0.3919	0.8399	1.1104	0.5329
Unigene0001240	15.9399	17.0684	21.9028	20.4945	13.656	14.4318
Unigene0001241	1.2614	0.1921	1.1708	0.7036	0.6954	0.94
Unigene0001242	1.651	1.1573	2.2118	3.2344	3.3792	3.7716
Unigene0001243	1.6696	2.5306	9.6921	3.2755	1.5843	1.129
Unigene0001244	1.2527	1.6837	0.2397	0.4111	1.4718	0.1037
Unigene0001245	0.5356	0.096	0.4101	0.4394	0.4841	0.621
Unigene0001246	3.9109	2.7378	4.1676	2.7901	4.3361	4.1674
Unigene0001247	0	0	0.1409	0	0.1331	0
Unigene0001248	9.9245	6.7848	7.4265	8.2241	8.6985	9.2588
Unigene0001249	1.6489	1.9822	1.0124	1.9725	1.1301	0.9557
Unigene0001250	1.8493	0.4639	0.8671	1.3804	2.2229	1.1791
Unigene0001251	1.254	0.342	1.0226	0.8766	0.3449	0.3792
Unigene0001252	2.4752	1.5427	2.7111	4.6751	3.3977	3.2394
Unigene0001253	1.0338	0.5813	1.7192	1.351	0.9472	1.1778
Unigene0001254	2.5358	3.3627	3.7577	3.2926	2.6454	3.0237
Unigene0001255	2.8731	0.7588	3.4439	2.6484	3.5875	4.0319
Unigene0001256	2.8349	1.9238	2.7083	1.5478	2.7931	3.3133
Unigene0001257	0.3749	0.5643	1.1048	0.3444	0.2846	0.4346
Unigene0001258	1.512	1.0213	1.4958	2.5645	2.6194	1.9146
Unigene0001259	4.8119	1.2072	3.0335	2.4055	2.4353	2.9532
Unigene0001260	5.227	1.4306	4.6153	2.865	2.7657	3.0298
Unigene0001261	1.1291	0.8716	0.64	0.1995	0.4396	0.5538
Unigene0001262	2.8572	1.1947	3.445	3.172	2.5306	2.9811
Unigene0001263	3.2395	0.3946	2.5507	2.4718	1.9133	3.1477
Unigene0001264	1.0321	0.7881	1.8336	1.3915	0.8801	0.7543
Unigene0001265	3.1982	3.9767	3.1946	3.1897	6.7444	1.9188
Unigene0001266	1.8892	0.5266	1.607	2.273	2.0489	3.2331
Unigene0001267	12.5121	7.6161	8.1964	14.9783	11.4246	12.2089
Unigene0001268	1.5905	1.9951	1.319	1.3047	1.0541	2.634
Unigene0001269	6.6458	3.1744	4.4207	5.521	6.4332	5.2521
Unigene0001270	13.1332	1.9582	7.0142	14.501	12.4805	12.9561
Unigene0001271	0.1977	0	0.0662	0	0.1876	0.1719
Unigene0001272	1.9312	0.5028	1.0251	0.8788	1.7059	1.2673
Unigene0001273	1.2491	1.487	2.3564	1.054	1.8063	0.9013
Unigene0001274	0.556	0.317	0.3386	0.4064	0.3198	1.1134
Unigene0001275	2.4816	2.3546	2.6852	3.2336	2.4958	2.8399
Unigene0001276	3.1194	1.6345	2.4862	2.7208	3.5472	2.1514
Unigene0001277	13.6723	13.3687	21.909	24.9215	18.7188	17.5363
Unigene0001278	0.0687	0.0862	0.1841	1.2624	0.3477	0.1593
Unigene0001279	1.3042	1.1578	2.1235	1.7052	1.0409	0.7211
Unigene0001280	0.4599	0.649	0.5391	0.4622	0.0727	0.7331
Unigene0001281	3.0805	1.1807	1.7959	1.1137	2.382	1.984
Unigene0001282	0.9596	0.6019	0.8035	2.1352	0.9106	0.7648
Unigene0001283	1.7648	1.1651	1.9546	1.3289	2.277	1.6062
Unigene0001284	0.8934	0.1446	0.9266	1.4563	1.094	0.5011
Unigene0001285	1.7612	0.7732	1.2977	1.517	1.3371	1.6334
Unigene0001286	0.6935	0.7361	0.2859	0.7964	1.0124	0.8039
Unigene0001287	6.4188	4.8964	7.0497	4.599	6.329	4.4412
Unigene0001288	0.3826	0.08	0.9397	0.7323	0.4841	0.3696
Unigene0001289	1.5643	0.9251	2.7244	3.2338	2.7145	1.7098
Unigene0001290	0.7228	0.9067	0.0968	0.3321	0.8231	1.0893
Unigene0001291	2.4527	2.0511	3.5361	3.1387	2.8965	3.7369
Unigene0001292	17.0524	14.1428	16.0288	22.1674	15.4624	21.5168
Unigene0001293	1.1511	1.2033	2.1418	0.4407	0.971	0.8896
Unigene0001294	2.7458	3.529	6.3618	4.8592	2.7338	4.2006
Unigene0001295	3.3623	3.5429	2.9729	4.402	3.1482	4.3655
Unigene0001296	0.7061	0.2531	0.6757	1.0426	1.7868	0.7016
Unigene0001297	7.0341	1.7937	5.1082	6.0904	7.2497	6.776
Unigene0001298	0.7749	0.5302	0.1888	0.7281	0.8022	0.1633
Unigene0001299	0.9338	0.2466	0.3621	0.6491	0.8706	1.1965
Unigene0001300	0.8328	0.7374	0.9844	0.9001	0.6198	0.5679
Unigene0001301	0.3668	0.3067	0.1638	0.5617	0.6188	0.0709
Unigene0001302	1.0611	1.0996	1.6688	0.2119	0.8756	0.6953
Unigene0001303	0.9338	0.1833	1.0334	1.1376	1.1507	1.0919
Unigene0001304	2.6709	2.6019	2.2078	1.6642	2.5885	1.8775
Unigene0001305	5.9927	1.7239	3.32	4.4243	4.3899	3.9437
Unigene0001306	30.2447	1.397	1.9755	2.6646	2.0354	10.3164
Unigene0001307	1.4339	0.3426	0.7318	0.5489	0.6048	1.029
Unigene0001308	1.1608	0.5139	0.7318	0.6273	0.8639	0.1583
Unigene0001309	49.8233	13.7468	35.8474	42.8509	44.2959	44.7752
Unigene0001310	13.8509	14.2367	20.1921	13.0392	12.5985	10.7098
Unigene0001311	2.6868	1.9973	2.8662	1.7142	2.3923	0.9806
Unigene0001312	0.8513	0.5221	1.5206	0.7387	0.5266	0.5044
Unigene0001313	8.447	2.2634	9.4062	11.1079	10.778	9.3378
Unigene0001314	0.634	0	0.6067	0.3121	0.2865	0.63
Unigene0001315	4.4699	3.5872	4.9508	3.3347	3.93	3.5599
Unigene0001316	0.3425	0.0859	2.2021	1.4158	1.1266	2.382
Unigene0001317	11.2925	4.7532	9.3986	9.048	8.8293	8.9158
Unigene0001318	6.2763	2.6346	4.5767	6.1225	5.0819	6.0846
Unigene0001319	0.2939	0.2765	0.5906	0.2532	0.1859	0.3407
Unigene0001320	0.912	0	0.2715	0.1164	0.1282	0.7048
Unigene0001321	0.6044	0.6499	0.6941	0	0.2185	0.4004
Unigene0001322	19.3709	24.978	22.8212	19.9236	22.0588	21.069
Unigene0001323	5.9409	2.959	5.3839	4.7158	3.4821	5.1653
Unigene0001324	1.2697	0.6878	1.8556	1.6239	2.2273	1.2712
Unigene0001325	2.7601	0.9002	2.0707	1.5849	2.3049	1.5358
Unigene0001326	1.5664	1.4737	1.3116	2.0238	1.5691	0.3783
Unigene0001327	10.3621	8.1631	10.0977	12.653	12.2225	9.6606
Unigene0001328	2.6175	0.6433	1.6441	1.8145	2.9743	2.567
Unigene0001329	5.7211	6.5677	7.5715	7.2473	7.0634	7.597
Unigene0001330	6.8599	2.4888	5.0098	3.839	5.538	3.8403
Unigene0001331	6.1744	2.3006	5.4871	3.1593	2.3205	4.2521
Unigene0001332	2.0621	2.316	4.9949	3.9515	3.322	3.1549
Unigene0001333	3.3496	2.476	1.6828	1.786	2.4975	1.1788
Unigene0001334	38.2715	13.335	16.7661	21.044	22.6586	27.3994
Unigene0001335	12.4355	23.983	20.6218	18.2037	14.68	11.2714
Unigene0001336	2.3508	0.2359	2.5194	2.0518	1.3087	1.4171
Unigene0001337	29.032	7.2088	17.3794	18.2675	22.044	18.9875
Unigene0001338	10.9019	1.6487	5.727	4.3217	5.908	4.6351
Unigene0001339	5.6006	3.579	2.265	4.8543	4.2786	4.7776
Unigene0001340	7.3027	2.8405	5.0053	4.0958	5.4437	7.0876
Unigene0001341	0.748	0.3128	0.2826	1.9824	1.5774	1.5342
Unigene0001342	1.4794	1.0916	1.399	1.799	1.6517	0.8071
Unigene0001343	1.6547	0.9267	2.2168	2.07	2.2433	2.5349
Unigene0001344	1.6257	1.0604	2.1997	1.4376	1.8307	0.9612
Unigene0001345	1.4343	0.7996	1.1742	1.3269	1.4115	1.0623
Unigene0001346	2.0778	0.2085	1.1134	1.2409	1.8929	0.7708
Unigene0001347	0.2036	0.1277	0.2727	0	0.2576	0.59
Unigene0001348	0.5082	0.0708	0.2269	0	0.2143	0.2618
Unigene0001349	3.6065	1.5895	2.0893	6.7164	5.5087	5.6498
Unigene0001350	1.8753	1.1202	2.6319	2.4613	2.9942	1.6046
Unigene0001351	5.2657	3.2083	4.3333	4.5787	5.9963	4.8835
Unigene0001352	6.4235	1.0815	5.5774	7.2343	7.2038	5.9789
Unigene0001353	6.5686	1.3807	8.324	6.3611	7.5474	7.7794
Unigene0001354	1.041	0.2229	0.9864	1.2247	0.8995	1.2068
Unigene0001355	1.039	1.1172	0.5966	0.4262	2.066	0.3442
Unigene0001356	9.1895	6.3654	9.8419	11.0175	9.0719	9.5409
Unigene0001357	5.7228	3.933	4.078	3.9853	5.0071	3.5994
Unigene0001358	6.3758	4.0509	6.933	6.5139	5.6052	6.0954
Unigene0001359	9.9764	7.3984	6.3652	8.177	11.094	8.3735
Unigene0001360	4.5896	1.6649	5.6499	5.2138	3.0605	3.7387
Unigene0001361	2.4533	0.0699	1.718	1.5368	2.0459	2.4562
Unigene0001362	0.962	3.5399	0.9881	2.136	1.623	1.0409
Unigene0001363	2.4985	2.0894	2.6551	2.5546	2.1209	2.4442
Unigene0001364	0.598	0.3334	0.178	1.9839	0	1.2324
Unigene0001365	2.0338	1.9699	3.7477	1.2812	1.6069	1.5718
Unigene0001366	4.7425	3.7041	6.1136	6.9879	5.3779	4.3049
Unigene0001367	14.806	6.534	11.8532	17.3315	19.1852	13.6072
Unigene0001368	67.6337	30.5919	53.1666	78.543	87.9718	71.2057
Unigene0001369	0.9752	0.8309	1.6762	1.3313	1.3736	1.1945
Unigene0001370	6.7875	4.1322	4.9409	4.4085	4.8683	5.4407
Unigene0001371	13.097	6.8711	13.7589	20.4647	15.5496	17.5641
Unigene0001372	10.2345	2.7176	6.3484	7.1366	9.0841	7.4773
Unigene0001373	12.0671	7.9533	10.7544	6.9879	9.5103	8.0614
Unigene0001374	12.2195	10.0494	13.5512	11.1816	10.6657	10.5447
Unigene0001375	3.3761	2.855	4.3195	3.3545	2.8798	2.9903
Unigene0001376	0.5181	0	0.2314	0.595	0.2185	0.4004
Unigene0001377	52.0481	38.9346	44.593	92.1451	81.1112	82.1342
Unigene0001378	41.453	51.2056	45.2321	39.4892	41.3872	38.4208
Unigene0001379	1.2254	0.9265	1.1469	1.1567	0.8283	1.2065
Unigene0001380	2.5254	2.6961	2.8793	3.2705	2.3115	2.1801
Unigene0001381	2.0493	1.7959	1.7864	2.7726	2.0246	2.4082
Unigene0001382	2.6638	1.8324	2.8203	2.8125	2.4735	2.4405
Unigene0001383	0	0	0.1062	0	0.1003	0
Unigene0001384	4.6952	3.5509	5.536	4.2823	3.7183	3.5847
Unigene0001385	1.2388	0.6081	0.3608	1.7939	0.8178	1.6859
Unigene0001386	2.6241	2.5046	2.5984	4.1274	3.6812	4.0341
Unigene0001387	1.0242	0.6424	1.2959	1.8297	1.1519	1.5171
Unigene0001388	17.2137	11.9238	11.8544	20.5231	22.7862	25.0442
Unigene0001389	2.2314	0.6167	1.938	1.846	2.7037	2.2032
Unigene0001390	0.6398	0.3648	0.7013	0.334	0.8096	1.0452
Unigene0001391	3.9721	1.8668	2.0376	2.6767	2.9906	3.1078
Unigene0001392	2.9176	1.0536	2.3688	4.2137	4.7543	3.1772
Unigene0001393	4.9456	2.0142	2.5383	4.4996	4.3885	4.2814
Unigene0001394	2.7422	0.637	1.9048	2.6243	2.1203	2.6491
Unigene0001395	24.9017	5.9547	25.7043	23.4192	24.0916	28.7826
Unigene0001396	1.3761	0.6118	3.8036	1.7404	0.7053	1.7568
Unigene0001397	0.881	0.1381	0.0738	0.6324	0.2787	0.383
Unigene0001398	0.2186	0.1371	0.4393	0	0.5533	0.3802
Unigene0001399	5.1655	4.3055	5.9639	5.7761	3.9559	5.3578
Unigene0001400	4.3529	2.5695	5.6027	4.0188	5.5076	2.7704
Unigene0001401	2.4748	2.3801	2.0998	0.9474	2.0876	1.1476
Unigene0001402	2.7427	2.9192	5.5672	4.4862	4.4168	4.9138
Unigene0001403	4.0557	4.7098	3.9148	4.7187	3.9663	4.332
Unigene0001404	1.7761	1.4445	3.7651	2.869	1.5805	2.1494
Unigene0001405	1.8372	1.3949	2.2021	1.9988	2.9363	2.0177
Unigene0001406	0	0	0	0.1801	0	0
Unigene0001407	1.1851	0.892	0.9129	0.7145	1.387	1.1334
Unigene0001408	2.9607	1.1401	2.5366	1.5973	2.4654	1.2132
Unigene0001409	1.996	2.9457	3.8537	2.9665	2.0799	1.7695
Unigene0001410	26.1182	17.5152	30.6263	23.2659	25.4557	21.8051
Unigene0001411	0.8316	0.7138	1.4073	0.4021	0.3877	0.4059
Unigene0001412	0.8114	0.6616	0.7065	0.9318	1.6939	0.1881
Unigene0001413	4.0923	1.6539	3.0279	3.3626	2.9031	3.4737
Unigene0001414	11.8592	2.5357	10.2506	8.2543	8.1279	8.714
Unigene0001415	7.2536	12.299	7.4116	8.4715	6.1834	6.3779
Unigene0001416	2.2705	1.3453	2.7665	2.6402	2.3386	2.5329
Unigene0001417	4.7924	4.4434	3.0706	6.1021	7.382	3.0194
Unigene0001418	7.3054	3.3995	6.6298	6.1796	5.8144	6.1012
Unigene0001419	2.0723	2.8162	3.2389	2.3799	2.6221	3.2032
Unigene0001420	14.8362	11.0212	13.7578	11.9269	9.2795	9.0264
Unigene0001421	2.7154	0.8222	2.007	3.1184	1.4217	2.0624
Unigene0001422	12.4501	8.6435	8.6483	9.5502	11.4434	10.6607
Unigene0001423	0.8129	0.5506	0.8712	1.4563	1.3576	1.7716
Unigene0001424	1.6222	1.9535	1.0431	2.2355	2.0525	1.5796
Unigene0001425	6.8543	4.619	11.2567	6.5165	5.5741	5.647
Unigene0001426	7.1517	8.9712	12.2173	11.2083	9.5348	11.7406
Unigene0001427	2.5573	4.6567	2.4313	6.2529	5.219	2.7734
Unigene0001428	5.1276	3.1905	4.1265	5.5188	4.8436	5.6352
Unigene0001429	16.4332	4.8279	9.6337	12.9927	14.5517	13.9899
Unigene0001430	1.2458	0.9767	1.217	1.0134	1.0837	1.3239
Unigene0001431	2.2998	1.0629	2.8648	1.6681	2.1441	1.5435
Unigene0001432	6.8851	4.2519	8.0175	6.569	7.7064	5.2801
Unigene0001433	9.0039	9.6454	8.8599	9.6542	9.0737	9.8837
Unigene0001434	20.0743	16.156	22.2487	34.9499	27.6042	31.3295
Unigene0001435	0.8442	0.5295	0.5655	0.277	0.6867	0.3495
Unigene0001436	0	0.2133	0	0.0976	0.1076	0.0986
Unigene0001437	9.4288	7.2579	8.6762	6.8635	8.1342	5.6033
Unigene0001438	0.1821	0.0762	0.3253	0.1395	0.4609	0
Unigene0001439	2.4848	1.6825	2.5455	1.491	2.2084	1.5748
Unigene0001440	4.8272	1.8732	5.1641	5.105	4.482	3.4623
Unigene0001441	8.1918	5.7746	7.0843	9.0825	6.6014	6.1029
Unigene0001442	2.0957	1.5125	1.3845	3.0661	2.4337	2.0301
Unigene0001443	58.6932	7.8369	46.6686	88.5858	45.0051	70.3392
Unigene0001444	2.6844	2.3197	2.3975	2.2608	2.8682	2.3512
Unigene0001445	3.5965	1.4398	2.3578	2.4606	3.3887	3.5483
Unigene0001446	0.433	0.4753	0.0725	0.2486	1.0272	0.6274
Unigene0001447	0	0.1175	0.1254	0	0	0
Unigene0001448	32.8416	18.8206	28.4308	27.5751	30.1157	28.2296
Unigene0001449	1.1792	0.2241	1.5798	0.9439	0.9043	0.5385
Unigene0001450	2.3185	2.0358	1.4199	2.1681	1.6763	1.8046
Unigene0001451	3.8684	1.5072	2.4997	2.6342	2.9944	3.3133
Unigene0001452	2.0277	1.2575	3.1133	2.8782	3.0846	1.9809
Unigene0001453	1.6086	0.778	2.0771	2.4038	0.9564	1.5952
Unigene0001454	1.6664	1.2746	2.7406	2.3027	2.3141	1.492
Unigene0001455	0.5813	0.9865	0.7329	0.589	0.1731	0.9117
Unigene0001456	1.3709	0.6449	1.2626	0.8856	0.6505	0.8939
Unigene0001457	1.6537	0.5353	0.7861	1.7766	1.1474	1.546
Unigene0001458	2.6215	1.973	2.1071	2.9406	2.6998	2.6998
Unigene0001459	2.7422	0.3175	2.0912	2.8102	3.0961	1.9563
Unigene0001460	38.7545	19.5472	30.2998	32.4379	33.0141	32.6942
Unigene0001461	1.0266	1.2878	2.6449	2.9022	1.3989	1.007
Unigene0001462	9.7466	1.5901	1.962	7.8196	11.086	6.5033
Unigene0001463	3.9691	3.3947	4.4714	5.1799	4.2231	5.5425
Unigene0001464	3.0821	2.0436	1.976	3.5902	3.0362	3.4964
Unigene0001465	13.3745	13.0668	12.5475	11.8795	9.2333	9.743
Unigene0001466	10.5416	7.8541	11.4237	11.0847	10.5983	9.5351
Unigene0001467	12.0386	7.8527	13.7085	9.4475	11.0857	8.9163
Unigene0001468	4.6981	3.4482	3.147	5.3381	4.5532	3.5343
Unigene0001469	22.6539	12.8962	20.996	17.3521	17.692	15.4632
Unigene0001470	7.1012	6.3468	9.5132	8.1553	9.2096	7.5118
Unigene0001471	3.2362	3.2476	2.4774	6.6899	2.8078	5.3595
Unigene0001472	32.2365	36.3137	38.843	39.9582	36.3398	33.5065
Unigene0001473	3.8552	2.0052	4.7868	3.2396	1.6657	4.5782
Unigene0001474	1.3233	0.5746	2.1137	1.6951	1.1592	1.0621
Unigene0001475	8.9818	4.2085	11.7705	10.1365	6.9037	7.6915
Unigene0001476	13.3039	6.6889	11.978	17.8767	14.9932	19.9809
Unigene0001477	10.1185	4.2095	10.8174	11.8067	11.2696	10.6344
Unigene0001478	6.5836	4.867	8.2789	5.3833	6.4642	5.4748
Unigene0001479	1.5776	1.1214	1.1976	1.3286	1.863	1.4021
Unigene0001480	2.6916	1.0504	2.1235	1.8547	2.4218	3.0163
Unigene0001481	4.4403	5.4101	11.0006	5.8925	5.2957	4.5934
Unigene0001482	8.6493	5.7537	6.4373	6.5218	10.2806	7.3429
Unigene0001483	3.5329	2.1466	3.2539	3.8355	4.0162	3.6156
Unigene0001484	0.6559	0.2743	1.0251	0.8788	0	0.5069
Unigene0001485	12.346	9.173	12.9347	11.7428	13.4182	14.7159
Unigene0001486	6.6923	2.0738	4.9619	5.1664	9.4734	5.4178
Unigene0001487	0.3508	0.3301	0.3525	0.8059	0.111	0.4067
Unigene0001488	8.7749	5.7311	10.8811	7.4956	7.1572	7.9026
Unigene0001489	4.1373	2.2916	3.4551	4.1344	3.0594	3.7996
Unigene0001490	5.7774	2.9603	5.4133	6.5135	4.6832	5.5683
Unigene0001491	19.5382	12.4323	16.9878	26.6349	22.5681	21.0445
Unigene0001492	1.1738	1.3322	2.3963	1.8616	1.2023	2.0736
Unigene0001493	2.9894	1.2837	3.3356	3.3869	2.7426	2.354
Unigene0001494	2.4617	1.5216	1.5772	1.6799	1.7154	0.9513
Unigene0001495	1.6546	0.3663	2.6078	1.2295	1.2315	0.2257
Unigene0001496	8.1264	3.6672	6.7192	9.6055	7.6235	9.2141
Unigene0001497	4.101	4.8586	3.4185	4.5005	4.843	3.3279
Unigene0001498	3.078	3.2383	3.8574	4.048	5.5277	3.8559
Unigene0001499	8.1515	3.5593	5.9325	6.1405	7.1389	6.4836
Unigene0001500	1.2034	1.2681	2.2571	2.3771	1.4618	1.6183
Unigene0001501	8.0455	2.8771	8.4617	11.4876	11.6688	11.0948
Unigene0001502	0.179	0	0.3596	0.2055	0	0.3112
Unigene0001503	21.8335	6.8273	13.8625	18.1653	19.7147	16.8243
Unigene0001504	0.9031	0	0.5761	0.6915	1.0883	0
Unigene0001505	0.258	0.4046	0.4321	0.8149	0.1632	0.7478
Unigene0001506	1.3869	0	0.6636	0.5689	0.376	0.9188
Unigene0001507	1.0468	1.3131	2.1034	1.7431	1.3244	1.5775
Unigene0001508	0.2695	0.3381	0.7222	0	0.6821	0.4166
Unigene0001509	1.0389	1.1946	1.6237	1.1931	0.2556	0.9701
Unigene0001510	8.6651	6.2301	10.8297	8.0096	8.2229	10.2289
Unigene0001511	2.2224	0.8609	2.6708	0.8257	1.9436	1.0987
Unigene0001512	0.9838	0	1.6109	1.0043	1.2448	1.0138
Unigene0001513	4.3842	2.6846	4.2867	3.3885	3.8253	3.866
Unigene0001514	5.5954	1.4974	2.9762	5.7215	6.1778	5.7947
Unigene0001515	0.6318	0.6934	0.3174	0.0907	1.1991	0
Unigene0001516	2.8536	1.5728	2.1576	3.7365	2.4755	3.7091
Unigene0001517	52.3996	22.5792	39.1645	35.3117	42.3153	39.8985
Unigene0001518	2.1046	1.6306	2.5707	1.3151	2.1538	1.0046
Unigene0001519	6.7573	4.0898	5.7414	5.6768	5.5225	5.9741
Unigene0001520	0.9648	0.4841	2.5851	1.1081	1.0987	2.6844
Unigene0001521	7.2836	1.5939	4.2252	6.228	5.6845	4.6032
Unigene0001522	8.7003	4.9929	11.1364	9.2232	9.1365	8.6568
Unigene0001523	5.6408	2.1245	5.2834	3.69	4.3161	3.614
Unigene0001524	4.3798	2.464	4.1961	4.3898	4.1311	4.5235
Unigene0001525	39.2828	16.8365	40.1756	55.8518	47.0544	49.669
Unigene0001526	4.286	3.5194	8.6693	3.9183	4.1029	3.5139
Unigene0001527	2.9964	1.9659	3.947	3.8156	3.4423	3.3138
Unigene0001528	2.3274	1.4192	2.9772	3.2019	3.0164	3.2133
Unigene0001529	7.2229	4.8579	8.4591	6.7039	6.5022	6.2404
Unigene0001530	4.7664	4.7048	4.8152	5.6534	4.8445	4.8914
Unigene0001531	0.8561	0.2577	1.4681	1.4552	1.1266	0.9528
Unigene0001532	0.0908	0	0.4256	0.0521	0	0.1052
Unigene0001533	0.4028	0.689	0.4906	0.6308	0.417	0.5943
Unigene0001534	3.5958	3.7889	8.1479	2.8317	2.9378	4.1923
Unigene0001535	3.8823	2.2137	3.8564	4.7246	3.3911	4.9226
Unigene0001536	0.1062	0.1332	0.4267	0.7316	0.403	0.2462
Unigene0001537	8.2942	5.7189	8.3152	7.8853	7.784	6.3677
Unigene0001538	6.7746	8.6183	8.723	6.1857	7.6026	6.5215
Unigene0001539	4.0266	1.5468	3.2798	4.1763	3.3587	3.5607
Unigene0001540	10.8808	5.9009	7.3979	8.8552	8.6952	8.1325
Unigene0001541	6.5768	7.2875	8.7152	6.4327	5.9776	5.3814
Unigene0001542	0.1797	0	0.3611	0.3095	0.2274	0.2083
Unigene0001543	1.4173	1.7271	2.0615	3.0229	1.8958	2.1125
Unigene0001544	5.7229	3.3133	4.4499	3.4011	4.8865	5.0337
Unigene0001545	2.9838	1.9021	3.2	4.4192	3.5691	4.3758
Unigene0001546	0.4789	0.1335	0.499	0.2445	0.1347	0.1851
Unigene0001547	2.5004	3.9207	4.6058	3.051	3.9547	3.895
Unigene0001548	3.1942	1.1599	2.7026	2.896	2.3398	3.0208
Unigene0001549	8.1367	2.4744	5.5604	5.333	5.5116	8.4322
Unigene0001550	1.4225	1.6654	2.1598	1.6337	1.3199	2.1987
Unigene0001551	4.8	2.6615	3.8442	7.4498	5.2592	4.9394
Unigene0001552	0.2227	0.2793	0.8948	0.5966	0.5634	0.4302
Unigene0001553	2.8612	1.5695	4.4827	3.698	3.8779	4.8123
Unigene0001554	2.4476	4.0254	4.6633	4.31	2.2022	1.3241
Unigene0001555	27.0257	11.8559	24.769	28.9615	26.1218	25.5991
Unigene0001556	4.8387	1.9883	3.4646	4.1198	4.4334	4.0619
Unigene0001557	1.9095	1.2703	1.5891	3.0901	2.5991	2.482
Unigene0001558	31.8168	17.7034	29.3925	22.9943	25.107	19.4914
Unigene0001559	3.7848	1.7991	2.295	4.4382	3.8815	3.0482
Unigene0001560	13.4227	9.6508	8.8594	11.9186	11.6469	9.2098
Unigene0001561	7.5497	5.2353	5.4093	7.9495	8.9515	10.2567
Unigene0001562	25.54	14.1663	21.1982	26.1037	26.7976	26.3044
Unigene0001563	1.6977	1.0648	1.7057	0.8356	1.5343	0.984
Unigene0001564	4.7384	1.1718	3.439	3.3249	3.8616	3.5422
Unigene0001565	0.1834	0	0.1638	0.351	0.1547	0
Unigene0001566	6.5934	3.0861	5.4711	5.0857	3.5487	4.6203
Unigene0001567	4.7718	1.2204	2.6688	2.2346	3.3412	2.5779
Unigene0001568	8.4865	6.0421	10.6009	9.417	10.0124	8.4422
Unigene0001569	1.8493	1.5692	1.5302	0.8745	1.8581	1.6394
Unigene0001570	2.8698	2.8465	3.1293	3.3341	3.42	2.7466
Unigene0001571	13.9371	14.1164	15.5592	18.6218	17.3491	15.2679
Unigene0001572	0.7608	0.1591	0.8494	0.3641	0.4011	0.2205
Unigene0001573	157.048	126.721	184.183	312.374	262.723	285.942
Unigene0001574	75.3894	68.7586	83.8671	175.015	127.899	163.645
Unigene0001575	1.2986	0.2678	1.3583	0.3882	1.0353	0.7218
Unigene0001576	1.1832	0.4166	0.9177	0.9536	0.7354	1.1792
Unigene0001577	5.0338	1.7787	4.749	4.6411	5.8309	2.8766
Unigene0001578	0.7474	3.0289	3.0807	1.0564	2.6914	0.8664
Unigene0001579	0	0	0	0.6216	0.2739	0.3765
Unigene0001580	10.3184	9.8735	8.9053	22.2568	16.1523	16.6774
Unigene0001581	0.6499	0.2329	0.1244	1.0663	1.4098	1.184
Unigene0001582	0.4492	1.4651	0.2407	2.3731	1.2504	3.0204
Unigene0001583	24.6025	25.0571	32.5225	27.6931	20.9865	21.4567
Unigene0001584	2.0198	1.7335	3.8451	3.4184	2.0176	3.4506
Unigene0001585	1.383	1.104	1.0948	1.1551	0.7954	1.3847
Unigene0001586	3.8935	0.64	3.8488	2.8487	2.9995	3.6309
Unigene0001587	0.4623	0.5189	1.3691	1.3693	0.9852	1.0155
Unigene0001588	6.8619	1.2898	2.6285	8.4348	8.8682	8.4778
Unigene0001589	1.5107	3.4572	2.4067	2.0632	2.1956	3.1003
Unigene0001590	3.9431	2.5594	3.2247	3.4752	2.6976	2.2324
Unigene0001591	1.4165	0.4936	2.003	1.1748	0.2987	0.821
Unigene0001592	5.0346	5.7325	9.5464	6.0933	5.7822	6.914
Unigene0001593	4.5591	2.3427	4.8567	5.0466	5.004	3.5022
Unigene0001594	7.3706	3.579	6.397	6.9629	6.9945	6.3165
Unigene0001595	5.1414	3.3195	5.0645	4.2982	5.3573	4.0757
Unigene0001596	5.5893	1.374	5.8243	5.6785	6.6552	6.4305
Unigene0001597	6.9925	7.9353	8.7274	8.4493	6.5083	5.7953
Unigene0001598	0.5677	0.7121	0.2074	0	0.1306	0
Unigene0001599	6.2237	1.3292	6.5266	9.5884	8.5837	8.288
Unigene0001600	0	0	0	0.2338	0.1288	0
Unigene0001601	1.271	0.6895	1.2885	1.5386	1.7386	1.2345
Unigene0001602	0	0	0.3417	0.5859	0.7531	0.0986
Unigene0001603	0.3668	0.3067	0.3276	0.1404	0.2321	0.7796
Unigene0001604	1.3844	0.3065	1.6364	1.4964	1.3395	0.6608
Unigene0001605	0.4998	0	0.2678	0.1148	0.253	0.4635
Unigene0001606	5.2402	2.1149	5.9824	3.4015	4.6124	4.7014
Unigene0001607	2.0016	1.2008	1.7487	2.5985	1.5415	2.3203
Unigene0001608	1.2433	1.0397	0.959	1.774	1.5255	0.6115
Unigene0001609	0.3312	0.4616	0.2958	0.0845	0.6985	0.5546
Unigene0001610	0	0.6008	0	0	0	0
Unigene0001611	12.4054	7.0177	7.792	6.8226	7.5504	6.7839
Unigene0001612	0.3068	0.7697	0	0.1174	0	0.1186
Unigene0001613	13.4452	18.3722	14.8293	20.0883	18.4325	17.584
Unigene0001614	0.912	1.5253	2.3077	2.3856	1.8591	1.9969
Unigene0001615	6.4651	4.3618	6.133	5.7592	5.3503	5.9553
Unigene0001616	8.0221	3.2672	6.932	7.6974	5.932	5.6362
Unigene0001617	2.1842	2.0092	2.3018	2.4415	1.4739	2.397
Unigene0001618	1.4317	0.7697	0.6165	0.6459	1.0998	1.2448
Unigene0001619	2.1827	4.1071	8.1876	2.9245	3.4983	1.7713
Unigene0001620	0.1004	0	0.5381	0.1153	0	0
Unigene0001621	1.9297	1.0829	2.381	2.4494	2.1846	3.0023
Unigene0001622	1.4165	1.4807	1.5022	1.8301	2.3896	1.2315
Unigene0001623	7.2544	6.1236	6.7222	6.5221	6.4228	5.2758
Unigene0001624	1.2423	0.1417	0	1.1024	1.0717	1.1783
Unigene0001625	1.1552	0.4576	1.2217	1.3615	1.4616	1.6915
Unigene0001626	1.3449	0.3615	1.4156	2.0962	1.2155	1.6705
Unigene0001627	4.9971	2.9114	3.7967	3.3636	3.8856	2.7364
Unigene0001628	6.0965	4.0531	5.227	7.4915	6.171	6.2193
Unigene0001629	3.2547	1.8895	2.8467	4.4483	2.6547	2.8376
Unigene0001630	0.9932	0.9611	0.7603	2.4442	1.1131	0.954
Unigene0001631	6.1874	4.4881	6.8552	8.5692	8.1513	7.4565
Unigene0001632	1.9322	2.13	2.5885	1.6138	2.1485	1.629
Unigene0001633	4.7243	2.5553	7.1418	5.9731	3.3452	3.9693
Unigene0001634	1.9603	0.7377	2.3636	1.666	0.6449	1.0454
Unigene0001635	0.9472	0.2263	1.0876	0.9324	0.3424	0.6274
Unigene0001636	0.1124	0	0.301	0.2581	0	0.1954
Unigene0001637	2.3295	1.3841	3.3671	2.816	0.6981	3.6243
Unigene0001638	0.9748	0.5754	0.5377	0.8561	0.5804	0.5983
Unigene0001639	0.5618	0.1762	1.0349	1.0484	0.0889	0.407
Unigene0001640	7.6402	4.5752	14.2986	13.4921	6.558	9.1241
Unigene0001641	2.0352	1.1292	1.5205	2.5171	2.0799	2.2686
Unigene0001642	2.3049	3.2274	2.2979	1.1696	2.7129	2.1749
Unigene0001643	6.6372	4.9001	5.0423	3.9135	5.4834	4.4459
Unigene0001644	5.287	2.8423	4.2401	3.1392	4.0047	2.2098
Unigene0001645	0.8748	1.2706	1.2952	0.4759	0.5825	1.1742
Unigene0001646	16.361	11.4551	11.7914	9.0106	11.8623	9.7805
Unigene0001647	1.7154	0.3663	0.7334	0.7126	1.016	1.354
Unigene0001648	4.0446	3.3435	3.3424	3.2924	3.7647	3.6828
Unigene0001649	17.393	11.4105	13.2574	8.4951	14.545	10.661
Unigene0001650	5.6392	1.128	2.1643	3.1681	2.5359	3.1892
Unigene0001651	5.2836	2.6616	5.9747	4.9116	5.3061	4.9869
Unigene0001652	2.4154	0.8332	1.9819	2.2538	2.4831	1.995
Unigene0001653	0.7719	0.4236	0.7755	1.7729	0.4883	0.7829
Unigene0001654	2.2224	1.1069	2.4081	2.0643	1.6127	1.6291
Unigene0001655	0.9559	0.621	1.2578	1.1566	1.7063	1.2863
Unigene0001656	6.991	0.9301	3.1928	3.102	5.696	3.6224
Unigene0001657	0.258	0.3237	0.0576	0.6915	0.5986	0.349
Unigene0001658	0.8303	0.5681	1.6179	2.3405	2.3876	1.75
Unigene0001659	0	0	0	0	0	0
Unigene0001660	0.4088	0.293	0.1565	0.1341	0.8128	0.7447
Unigene0001661	1.805	0.6668	1.8218	1.9735	1.314	2.3791
Unigene0001662	0.8245	0.4181	0.94	0.7253	0.5105	0.4677
Unigene0001663	1.1432	1.3918	1.7116	1.004	1.2337	0.7796
Unigene0001664	1.4042	0.4835	1.7336	1.2964	0.9754	0.7022
Unigene0001665	0	0	0.1143	0	0	0.0989
Unigene0001666	0.0857	0	0.3443	0.0984	0.6505	0.1987
Unigene0001667	1.8921	0.5086	2.933	3.011	1.8468	2.4754
Unigene0001668	0.9302	0.2222	1.6615	1.2717	0	0.2054
Unigene0001669	2.2993	0.1342	1.3611	0.6755	1.9621	0.3719
Unigene0001670	2.059	0.3826	3.6267	1.8391	1.4956	1.3703
Unigene0001671	1.0186	0.0913	0.8772	0.5849	0.7365	0.6748
Unigene0001672	0.3541	0	0	0	0	0.2053
Unigene0001673	25.5605	22.7386	23.7801	19.1559	17.8992	17.9617
Unigene0001674	5.2284	4.8891	10.6697	4.1725	4.1459	4.4804
Unigene0001675	6.7889	2.0864	3.763	4.6731	5.0412	4.2203
Unigene0001676	2.5122	0.8404	2.1315	2.0196	2.7548	2.2328
Unigene0001677	1.8656	0.4927	0.7893	1.1277	1.1182	1.0245
Unigene0001678	4.3553	2.9418	2.9707	3.3528	4.0371	3.3844
Unigene0001679	4.3261	3.6178	4.2929	3.5882	4.4601	4.1792
Unigene0001680	4.0067	1.946	3.3169	3.162	3.1848	2.9179
Unigene0001681	8.1163	5.1675	7.621	7.4907	6.6705	8.1298
Unigene0001682	1.4678	0.2809	1.3331	1.8285	1.5739	0.3749
Unigene0001683	0.7327	0.5252	0	0.2404	0.5298	1.2135
Unigene0001684	4.8202	5.2479	4.3862	5.4835	5.1208	7.0639
Unigene0001685	1.0567	0.5028	0.537	1.3391	0.4149	0.7181
Unigene0001686	4.5204	4.7426	8.4782	5.8993	4.7837	5.0974
Unigene0001687	21.8718	10.9144	16.3614	12.8343	14.8471	13.2328
Unigene0001688	1.8018	1.9034	3.6843	1.8515	2.3998	2.5286
Unigene0001689	13.0239	2.8622	5.9376	7.1191	6.5405	7.5725
Unigene0001690	1.8658	1.0955	2.3932	1.9604	1.2055	1.2886
Unigene0001691	5.3074	3.3041	6.475	4.5072	4.4159	5.4199
Unigene0001692	5.4324	2.0849	3.1131	5.1076	4.3617	5.5839
Unigene0001693	1.4936	0.2677	2.5727	0.9802	1.2149	0.8658
Unigene0001694	10.6687	2.749	8.6866	9.5423	8.3032	9.566
Unigene0001695	0.6233	0.391	0.3758	0.7159	1.4986	1.2285
Unigene0001696	0.8742	0.9279	1.9819	2.0079	2.8078	1.4032
Unigene0001697	3.3724	1.7496	3.0677	2.7972	2.8183	2.7029
Unigene0001698	2.1885	0.5628	2.0376	2.6013	1.703	1.7252
Unigene0001699	7.0042	4.1356	5.8003	5.9151	6.2489	5.2034
Unigene0001700	2.4336	1.3601	2.8405	2.1307	1.7987	2.4022
Unigene0001701	0.5998	0.2508	0.1786	0.7653	0.5059	0.3863
Unigene0001702	3.7543	2.6697	3.9083	2.9385	2.0877	2.3286
Unigene0001703	1.0225	0.5893	0.8515	0.4443	0.4895	0.3844
Unigene0001704	9.7787	8.1188	10.0504	10.4577	8.9009	9.6266
Unigene0001705	0.7623	1.1156	2.2126	1.0214	1.7683	1.2274
Unigene0001706	7.6275	4.6539	8.3043	6.1927	5.948	5.1558
Unigene0001707	1.0087	1.4954	3.8082	1.2637	1.0442	1.4882
Unigene0001708	3.3861	0.3792	1.7011	1.6666	4.1314	1.9627
Unigene0001709	15.3224	7.9043	18.4559	22.1815	20.1549	22.2091
Unigene0001710	6.6992	6.2589	6.544	6.3713	7.5935	6.7549
Unigene0001711	7.1558	3.53	4.7393	4.8939	6.2057	7.2702
Unigene0001712	5.3978	4.5583	5.2935	6.1991	4.5086	4.8261
Unigene0001713	7.7768	3.6039	5.8064	6.6557	5.108	7.3501
Unigene0001714	0.0995	0	0.1333	0	0.2518	0.3461
Unigene0001715	2.151	1.7899	3.2239	1.7121	2.1018	1.7529
Unigene0001716	2.2828	0.9989	1.9914	1.1584	1.2091	1.354
Unigene0001717	6.8971	2.0934	7.4852	6.5745	7.0563	5.8773
Unigene0001718	4.0258	2.0118	4.1765	4.6516	5.0213	5.5966
Unigene0001719	1.7458	1.022	1.6112	1.4257	2.7489	0.9445
Unigene0001720	8.8764	4.3302	9.359	7.6141	6.4822	6.9871
Unigene0001721	5.0416	4.458	3.6538	7.7357	4.0261	6.084
Unigene0001722	11.2064	13.3823	13.9525	13.1243	14.2193	13.3948
Unigene0001723	1.2206	0.7043	1.2428	2.4111	1.7916	2.066
Unigene0001724	0.4313	0.0984	0.4727	0.4052	0.2976	0.4091
Unigene0001725	2.832	2.5451	4.0204	3.1068	3.9577	3.038
Unigene0001726	4.7768	4.551	8.1004	5.1387	3.8636	4.6614
Unigene0001727	1.4558	0.5218	1.7832	1.027	0.9473	0.6751
Unigene0001728	1.5752	1.664	2.2213	0.7617	1.4336	1.4416
Unigene0001729	0.5161	0.1295	0.1383	0.7112	0.5224	0.4786
Unigene0001730	5.7002	2.1286	3.6526	5.3449	5.5239	4.8414
Unigene0001731	3.2028	2.8698	3.0648	3.6783	4.7279	4.597
Unigene0001732	12.0746	9.9612	14.5729	15.0537	13.2132	10.782
Unigene0001733	3.1338	2.0948	5.5899	4.6511	4.6584	4.4815
Unigene0001734	2.6889	2.0016	3.1272	3.2917	2.2806	2.021
Unigene0001735	2.5551	1.6909	2.2101	1.5018	1.8583	1.7259
Unigene0001736	0.7296	0.3051	0.733	1.0473	0.3077	0.3524
Unigene0001737	6.5923	2.5507	6.2566	6.1442	7.4366	6.7455
Unigene0001738	4.0358	2.25	3.4504	6.9325	5.4556	5.6249
Unigene0001739	0.8607	0.5399	0.5766	0.556	0.6126	0.7484
Unigene0001740	1.5624	1.8463	2.0325	0.4681	1.1747	1.2338
Unigene0001741	9.9907	13.0009	14.7392	16.1918	12.011	14.5404
Unigene0001742	0.1099	0.2067	1.3981	1.1355	0.0695	1.4646
Unigene0001743	2.3061	1.4191	1.399	1.3992	1.6517	2.5725
Unigene0001744	3.6737	4.546	2.9263	2.1095	2.5754	3.4531
Unigene0001745	11.3077	12.6815	14.0785	10.3202	10.328	10.6779
Unigene0001746	3.1459	0.7544	4.0699	3.1701	2.8878	2.2704
Unigene0001747	33.5598	21.8625	28.6081	25.7988	29.1797	24.1225
Unigene0001748	2.8873	1.2421	3.1434	3.8223	3.769	3.0963
Unigene0001749	51.8781	37.5099	53.9851	47.5294	54.6153	47.2215
Unigene0001750	1.7712	1.0792	1.5254	1.6854	1.5368	1.1733
Unigene0001751	11.1749	3.0133	5.7274	8.7017	9.105	7.4588
Unigene0001752	1.5009	1.001	1.9599	2.6838	1.7308	1.5638
Unigene0001753	11.9093	8.2598	10.2578	15.1671	11.4723	14.9623
Unigene0001754	28.2177	14.1277	24.3384	22.8216	22.0535	19.9204
Unigene0001755	0.663	0.3914	0	0.3583	0.5922	0.2261
Unigene0001756	11.4909	6.2608	8.6671	13.7857	11.607	11.32
Unigene0001757	7.0952	1.9411	4.8294	5.1865	5.7868	5.9796
Unigene0001758	2.5701	1.8605	2.1993	1.6513	1.7047	2.0344
Unigene0001759	1.1138	1.1823	2.0278	0.3608	0.7227	0.9933
Unigene0001760	0.4506	0.3533	0.4527	1.6171	1.8529	1.11
Unigene0001761	3.1801	1.0959	4.0731	2.5886	3.9575	2.9777
Unigene0001762	3.1431	1.6151	2.638	2.131	4.5998	2.3267
Unigene0001763	1.2169	0.7633	1.1508	1.2332	1.1322	0.5394
Unigene0001764	1.6109	1.0722	0.6166	1.2082	1.1231	1.4482
Unigene0001765	7.3438	2.9038	5.1597	5.0649	5.4793	4.7888
Unigene0001766	3.8121	1.5247	4.6628	3.4474	3.4486	2.3697
Unigene0001767	0.5479	0.6186	0.734	0.5034	0.7626	0
Unigene0001768	1.344	0.3372	0.8402	1.3377	0.7558	0.5886
Unigene0001769	18.5851	12.5394	15.6901	17.9576	16.4179	17.6028
Unigene0001770	1.3939	1.4154	1.8525	1.2577	1.4417	1.7313
Unigene0001771	2.9321	0.9462	2.9012	3.8284	3.5252	3.4836
Unigene0001772	1.0764	0.4155	1.2757	1.0936	0.8382	1.1519
Unigene0001773	2.0174	0.412	1.5713	1.2392	1.7809	0.8702
Unigene0001774	3.4504	1.1033	3.5348	2.6418	2.3113	2.2745
Unigene0001775	1.6715	0.7953	2.0849	1.3901	1.4586	1.1359
Unigene0001776	11.014	5.8107	12.2776	10.192	11.4239	9.1006
Unigene0001777	15.1139	7.9741	15.215	13.9956	13.6545	12.2374
Unigene0001778	7.1477	2.6412	5.0352	6.4058	5.7839	5.9202
Unigene0001779	4.246	2.0099	2.3611	2.6681	3.4464	4.0863
Unigene0001780	1.4566	0.9673	2.2383	2.8536	2.2766	1.1919
Unigene0001781	0.9648	1.8154	3.0467	2.5327	2.18	2.3169
Unigene0001782	0.5739	0.7199	0.7688	0.8788	1.2103	0.998
Unigene0001783	0.9673	0.0714	0	1.1109	0.8639	0.2638
Unigene0001784	18.4257	9.0034	13.6719	19.2867	20.5259	16.8788
Unigene0001785	6.3236	2.8645	6.4321	8.7416	7.9271	7.5343
Unigene0001786	1.4228	1.2378	1.3527	1.7921	1.7712	1.3568
Unigene0001787	3.8593	1.2859	3.8776	3.1164	3.052	1.8176
Unigene0001788	1.0717	0.1582	1.3513	1.2308	0.7179	1.0963
Unigene0001789	5.0796	1.4755	5.6605	5.8336	4.6229	3.8089
Unigene0001790	10.8362	15.4247	18.1294	11.188	9.6201	8.3404
Unigene0001791	1.8493	0.5458	0.8744	0.6663	1.1929	1.3872
Unigene0001792	0.4394	0.9646	0.883	0.5047	0.556	0.5094
Unigene0001793	0.2336	0.7618	0.751	0.2683	0.3547	1.1915
Unigene0001794	2.7187	1.434	1.6344	1.8866	2.7713	2.5614
Unigene0001795	3.2525	1.7043	3.6402	1.6076	2.4744	2.5773
Unigene0001796	10.3683	4.787	8.6813	8.6494	8.0536	7.8128
Unigene0001797	1.0576	0.4189	2.2868	1.5981	1.4086	1.5057
Unigene0001798	3.0411	2.2667	2.9227	1.4932	2.8719	2.1459
Unigene0001799	14.1754	3.1722	8.0033	13.3887	11.9328	13.2728
Unigene0001800	11.9824	7.194	10.3892	12.7426	9.9994	12.0516
Unigene0001801	0	0	0	0	0	0
Unigene0001802	10.9415	5.0261	11.3547	11.1498	10.8218	8.9324
Unigene0001803	1.8625	1.2821	1.5519	1.9303	1.6094	1.8432
Unigene0001804	1.5115	1.0342	0.4602	1.5254	1.188	0.9557
Unigene0001805	4.6903	1.857	3.5934	2.4071	2.9859	1.9201
Unigene0001806	6.6272	3.086	5.2462	8.4758	7.7818	7.6827
Unigene0001807	0.9556	0.7991	0.9957	0.3658	0.8061	1.6001
Unigene0001808	2.7739	0.7077	2.8973	3.6176	3.1528	2.5071
Unigene0001809	2.3408	1.0288	1.9013	1.4499	2.8568	1.8375
Unigene0001810	3.0996	1.7468	2.4674	2.9922	2.8419	2.1351
Unigene0001811	1.803	0.5219	1.1148	1.115	1.8426	1.6078
Unigene0001812	1.8005	1.3551	1.3869	1.0339	1.6517	1.9307
Unigene0001813	3.4159	2.1576	3.213	2.9213	2.6975	2.6119
Unigene0001814	0.631	0.2639	0.2818	0.3623	0.6654	0.1219
Unigene0001815	3.1734	2.0045	3.2261	3.4893	3.4742	4.018
Unigene0001816	11.4837	6.7862	12.0942	13.85	11.2498	12.5882
Unigene0001817	6.3846	4.1061	4.8	10.1094	6.9029	8.2902
Unigene0001818	1.7781	0.4461	3.0491	2.8589	2.2499	2.3087
Unigene0001819	1.1639	0.438	1.6112	1.2475	1.3745	1.5291
Unigene0001820	11.9836	8.6025	15.0292	12.5305	14.3061	14.096
Unigene0001821	17.442	13.5822	22.2462	19.1262	18.6781	18.7721
Unigene0001822	1.4516	0.7064	2.0397	2.3952	2.4173	2.2582
Unigene0001823	18.2095	12.7862	17.1402	17.1324	16.3901	21.725
Unigene0001824	18.0555	11.2612	23.7829	14.596	11.8694	14.4998
Unigene0001825	0.5608	0.5025	0.6439	0.644	1.115	0.743
Unigene0001826	0.0807	0.6073	0.1081	0.278	0	0.3742
Unigene0001827	29.2046	14.7627	29.3796	22.2185	26.7045	26.0023
Unigene0001828	6.1966	2.3984	5.2462	7.9101	7.5782	7.8422
Unigene0001829	0	0	0.1139	0.1953	0.3227	0
Unigene0001830	0.6793	1.0145	1.2568	0.5944	0.9005	0.75
Unigene0001831	2.9187	1.3366	3.2894	1.9686	5.1584	4.028
Unigene0001832	0	0.3516	0.1252	0.0537	0.3547	0
Unigene0001833	2.595	1.003	1.7664	1.6432	2.1476	1.7074
Unigene0001834	1.1937	0.6806	1.3084	0.1246	0.206	0.3774
Unigene0001835	1.603	1.9479	1.3422	0.8054	0.8873	1.3937
Unigene0001836	1.8098	1.5135	1.5586	1.7815	2.0173	1.1489
Unigene0001837	7.316	3.8315	5.8665	6.6341	8.1292	6.7812
Unigene0001838	9.2991	6.0313	6.2996	4.0655	7.0864	4.6551
Unigene0001839	5.0811	3.1219	4.3065	3.0963	3.7612	3.1656
Unigene0001840	2.5086	1.8154	2.1973	2.6593	1.6481	3.2436
Unigene0001841	3.0301	4.6581	8.2381	3.6505	4.3978	2.6862
Unigene0001842	0.2067	0.1729	0.277	0.4749	0.6104	0.4794
Unigene0001843	4.3141	1.705	5.8982	4.1061	4.15	4.1448
Unigene0001844	4.0279	1.2986	4.0849	3.4153	3.6914	4.3858
Unigene0001845	8.9892	4.2797	5.8821	4.7018	3.5285	5.1244
Unigene0001846	8.5634	4.2122	7.3941	6.4242	7.5692	7.558
Unigene0001847	6.3301	2.6828	6.1149	7.3356	7.1013	7.1219
Unigene0001848	2.6357	2.3464	2.9615	2.1482	3.8728	3.5483
Unigene0001849	3.135	1.6142	3.723	2.9557	2.8927	2.5868
Unigene0001850	1.1532	1.0959	0.7959	0.5619	0.8844	1.0938
Unigene0001851	16.6862	5.2817	6.7689	11.2292	13.4175	11.3351
Unigene0001852	5.7077	3.3947	5.9985	4.7467	3.86	3.4224
Unigene0001853	2.5924	0.7805	1.1114	2.62	2.8865	2.5245
Unigene0001854	2.9031	1.4196	0.8569	1.1867	1.4319	0.7986
Unigene0001855	26.9325	22.2479	21.5226	28.1847	26.942	29.8759
Unigene0001856	9.067	3.6232	7.2302	4.5824	5.4254	4.289
Unigene0001857	5.121	3.2629	6.2071	3.6407	6.5824	5.3712
Unigene0001858	15.544	6.414	11.6449	15.6199	11.5159	9.484
Unigene0001859	0	0	0.2457	0	0	0.2126
Unigene0001860	2.9263	1.3256	3.4847	3.5474	2.2627	2.3558
Unigene0001861	10.3893	8.6883	11.7205	16.3796	9.6861	10.2479
Unigene0001862	1.9028	1.6723	3.0037	2.0321	2.1622	1.9389
Unigene0001863	8.9588	7.0575	10.7674	9.3431	8.483	8.2267
Unigene0001864	3.2405	1.9187	3.8203	5.2995	4.0018	4.6883
Unigene0001865	10.4272	12.7445	14.542	15.5367	14.1406	15.2493
Unigene0001866	1.6402	0.5446	1.9388	1.7175	2.0143	1.454
Unigene0001867	0.3304	0.4835	0.6639	0.6324	0.7664	0.6383
Unigene0001868	1.0914	0.5867	1.114	1.2534	1.7754	1.9279
Unigene0001869	2.6005	1.3918	2.7406	1.5132	2.7201	1.1657
Unigene0001870	2.6667	0.2389	1.7863	1.3125	1.8076	1.5457
Unigene0001871	0.7824	1.606	1.2863	0.776	0.8999	0.6184
Unigene0001872	2.2896	2.2093	2.7527	2.2923	3.6398	1.4972
Unigene0001873	1.3637	1.0886	0.4152	1.9221	0.7059	0.7904
Unigene0001874	7.0354	7.2885	9.0343	5.775	5.5507	4.1658
Unigene0001875	0.6266	0.9825	0.9093	0.5397	0.9249	0.4237
Unigene0001876	2.2545	1.2929	1.5102	2.8851	1.9561	2.4643
Unigene0001877	1.4956	0.3927	2.1434	2.8761	0.7922	1.5322
Unigene0001878	3.197	2.6661	2.4764	2.9639	3.0507	2.9193
Unigene0001879	9.9461	4.0411	11.7322	11.9703	9.1912	10.796
Unigene0001880	8.826	4.1122	12.346	11.9527	8.1508	9.8596
Unigene0001881	9.2963	4.6645	7.5527	10.4007	8.727	9.7339
Unigene0001882	0.3512	0.6809	1.1977	1.6501	0.7676	0.7773
Unigene0001883	4.0874	4.4223	5.1563	3.7162	3.4263	4.0079
Unigene0001884	2.2538	0.9786	2.6129	1.0951	1.7	1.2059
Unigene0001885	0	0	0	0	0.1835	0.0841
Unigene0001886	11.4251	6.4375	10.2389	10.2193	12.4108	14.1544
Unigene0001887	0.6638	0.119	0.6352	1.5248	0.9599	0.2199
Unigene0001888	59.9439	36.0259	40.1184	41.4533	45.4949	39.0574
Unigene0001889	49.273	30.7767	32.0336	39.0523	40.5573	39.7031
Unigene0001890	12.9263	12.8049	12.8948	14.0487	12.565	10.2901
Unigene0001891	14.4343	5.2532	8.9456	10.4122	9.6143	10.1267
Unigene0001892	10.1668	3.1831	5.6213	5.8856	4.7636	4.576
Unigene0001893	0.9517	0.7597	1.2749	1.391	1.5873	0.7522
Unigene0001894	17.3573	9.295	17.8243	30.6154	24.9651	26.3741
Unigene0001895	27.3437	14.8672	23.0698	34.7857	29.6468	31.8963
Unigene0001896	4.9059	2.7842	5.5025	5.2202	4.5597	4.6096
Unigene0001897	11.1073	6.1141	10.7676	8.7462	7.7385	7.3617
Unigene0001898	9.3747	6.5063	10.8822	10.4345	10.2324	8.524
Unigene0001899	3.6448	2.0202	3.3839	2.7841	2.9172	3.3017
Unigene0001900	0.7008	0.2344	1.4395	1.234	0.8867	0.8124
Unigene0001901	2.3085	0.8873	2.8328	3.8348	3.4262	3.9591
Unigene0001902	2.5558	2.4427	4.837	2.8653	2.7462	2.4926
Unigene0001903	24.8541	11.4972	20.492	21.4312	23.7424	20.2692
Unigene0001904	3.1634	1.6427	2.1876	3.8051	4.1623	3.6581
Unigene0001905	0.4607	0.4816	0.4115	0.97	1.0687	0.089
Unigene0001906	0	0	0.1265	0	0	0
Unigene0001907	7.0296	4.5796	7.0582	7.1523	6.5576	8.3151
Unigene0001908	3.2926	2.4158	2.8297	2.8824	3.0656	3.3993
Unigene0001909	6.8472	8.8159	9.2032	6.2805	6.9481	7.9115
Unigene0001910	2.711	0.6315	0.7782	1.2898	1.4211	1.5265
Unigene0001911	3.4455	1.2453	2.5035	2.6826	4.4334	3.3172
Unigene0001912	56.461	29.2634	61.8345	62.3714	61.0888	62.2047
Unigene0001913	3.5569	1.8953	3.2048	4.4463	2.987	3.5395
Unigene0001914	1.8275	0.9825	1.9586	1.3792	2.4444	1.8764
Unigene0001915	0.1441	0.3615	0.0965	0.4965	0.1823	0.0835
Unigene0001916	1.2454	0.9942	0.9859	0.5851	1.0744	1.575
Unigene0001917	4.2112	2.2049	4.7095	2.9859	2.641	2.8867
Unigene0001918	0.0973	0	0.6519	0.1118	0	0.1128
Unigene0001919	4.4247	2.3495	4.5457	4.3021	4.1216	3.729
Unigene0001920	8.9624	5.7469	9.4748	7.366	7.2822	7.3027
Unigene0001921	2.0091	1.5547	2.4293	1.3185	1.6012	2.0568
Unigene0001922	4.2008	3.2075	3.5479	2.5171	2.6576	1.6939
Unigene0001923	0	0	0	0	0	0
Unigene0001924	1.554	2.4952	0.4996	0.7139	1.9663	1.153
Unigene0001925	2.7113	3.0872	3.5205	2.012	3.2723	2.8046
Unigene0001926	7.9399	7.3079	8.3291	6.5287	6.5786	6.1726
Unigene0001927	0.3075	0	0.206	0.2943	0.3891	0.1782
Unigene0001928	9.0918	3.4446	6.2906	6.6804	8.1018	7.1422
Unigene0001929	7.3263	4.3287	9.8147	10.7306	8.7996	8.9239
Unigene0001930	4.3149	1.6201	3.1459	4.6183	4.3083	4.0834
Unigene0001931	2.8037	1.4218	3.5962	2.3293	4.5287	4.1493
Unigene0001932	3.0964	1.2947	4.3457	3.2174	2.7985	2.4785
Unigene0001933	9.7404	7.6321	17.285	11.17	9.0736	10.1134
Unigene0001934	15.3382	11.6271	19.1553	15.175	16.342	15.1379
Unigene0001935	0.1067	0.3346	0.2859	0.6126	0.4725	0.3092
Unigene0001936	10.902	6.755	8.3693	7.69	10.6546	11.2408
Unigene0001937	1.7297	0.8997	1.8651	3.004	2.4021	2.5432
Unigene0001938	0.7163	0.9734	1.0996	2.6051	1.3973	1.384
Unigene0001939	3.3772	1.4433	2.9579	2.9785	2.1877	2.6749
Unigene0001940	2.4657	0.7544	1.6919	1.4504	2.0545	1.1852
Unigene0001941	7.3568	4.4357	7.8452	6.6065	6.8204	7.2787
Unigene0001942	28.505	12.8269	25.4375	24.1057	19.1344	33.8482
Unigene0001943	24.6247	20.0497	46.8033	17.7638	17.9403	17.0227
Unigene0001944	3.2857	0.9527	2.9198	3.7545	4.0529	4.3067
Unigene0001945	0.7522	0.1887	1.4109	0	0.2855	0.9593
Unigene0001946	8.0436	4.2501	6.2714	8.2277	8.1158	6.4463
Unigene0001947	6.4922	3.7172	5.1518	4.832	6.2682	6.5035
Unigene0001948	14.9143	4.2211	10.6914	10.6183	11.7612	11.7433
Unigene0001949	1.9954	1.517	1.5391	1.9444	2.2952	1.9627
Unigene0001950	4.7072	1.2559	3.9638	2.9861	3.8194	2.8064
Unigene0001951	6.5167	2.0221	3.7218	2.6785	4.2963	4.6918
Unigene0001952	2.1806	1.2872	1.0311	2.0624	2.2722	2.3792
Unigene0001953	12.8091	4.7217	7.3005	6.8391	8.2457	9.5737
Unigene0001954	2.8394	2.2467	3.4527	7.3746	5.9694	4.2538
Unigene0001955	13.1384	8.542	10.1957	9.5684	10.542	7.9869
Unigene0001956	0.1416	0.1185	0.1898	0.3253	0	0.1095
Unigene0001957	9.2601	4.8779	8.6685	8.7769	8.4759	8.2706
Unigene0001958	7.656	2.3308	7.5674	7.2794	5.4096	6.1666
Unigene0001959	4.1602	1.5074	6.3457	6.2877	4.5956	4.248
Unigene0001960	4.4998	2.2192	5.616	3.2243	3.9416	5.5285
Unigene0001961	1.5968	1.1299	2.3037	2.4451	2.3312	1.5663
Unigene0001962	0	0	0	0.2499	0.4129	0.1261
Unigene0001963	6.2258	5.8457	7.1184	5.9041	5.6468	6.7743
Unigene0001964	83.5022	32.4979	60.9214	52.0372	56.2946	59.2615
Unigene0001965	7.4317	3.8145	4.968	5.9454	7.6764	6.5173
Unigene0001966	8.4474	3.2007	6.324	5.1632	6.1875	6.021
Unigene0001967	0.3075	0.1286	1.0985	0.7063	1.3618	0.9506
Unigene0001968	6.0974	3.9509	6.1309	5.3639	5.3988	5.2793
Unigene0001969	0.2706	0.4526	0.2417	0.3108	0.799	0.4183
Unigene0001970	0	0.1385	0	0	0	0
Unigene0001971	1.5994	0.7523	1.6962	0.6888	1.2648	1.0043
Unigene0001972	1.072	0.8741	1.125	0.9029	0.746	0.9321
Unigene0001973	2.6718	1.862	2.5851	2.0882	2.8172	2.4951
Unigene0001974	9.6353	5.7522	6.2529	6.3008	6.4238	7.1196
Unigene0001975	7.0608	3.2928	7.6682	6.8388	5.7509	7.8331
Unigene0001976	1.5327	0.0836	0.8035	1.0714	0.8432	0.927
Unigene0001977	1.6371	0.9887	1.787	2.2978	2.7618	1.1949
Unigene0001978	0	0	0	0	0	0
Unigene0001979	0.2503	0.5232	0	0.2874	0.2111	0.1934
Unigene0001980	0.3068	1.0262	1.644	1.1744	0.3882	0.4742
Unigene0001981	1.0262	0.6168	1.0883	0.3437	1.3796	0.7187
Unigene0001982	4.7005	4.066	9.2539	9.492	7.5599	6.798
Unigene0001983	4.8107	7.1052	5.0934	3.2079	4.2215	3.9577
Unigene0001984	1.7728	1.2653	1.3923	1.1935	1.547	1.5945
Unigene0001985	1.5398	0.7953	1.2134	2.3925	0.9168	1.89
Unigene0001986	1.8436	1.4561	1.0062	2.3525	1.9871	2.3746
Unigene0001987	3.456	2.5099	3.046	3.8646	4.603	3.6901
Unigene0001988	7.6948	7.6818	13.387	8.9998	9.8141	7.8633
Unigene0001989	0.6068	0.1087	1.3935	1.4933	1.0968	0.6029
Unigene0001990	0.8593	0.5707	0.8803	0.5225	0.3838	0.3516
Unigene0001991	3.414	1.0706	5.1754	3.4049	3.1261	2.8121
Unigene0001992	0.7123	0.2749	1.1011	0.5034	0.4853	0.7622
Unigene0001993	1.9267	0.4316	1.4749	1.2644	1.1754	1.3561
Unigene0001994	8.3338	2.4312	9.0874	7.2338	4.2914	7.302
Unigene0001995	1.1592	0.3116	1.9967	0.2853	1.0477	0.5759
Unigene0001996	1.6902	0.4788	2.9948	3.1935	2.0696	2.7811
Unigene0001997	0	0.2372	0.1689	0	0	0.5116
Unigene0001998	1.2995	3.0094	2.0087	2.6404	1.8972	0.5794
[truncated: 42,026 more rows]
