# Supplementary material for: Transcriptome Analysis of Antennal Chemosensory Genes in Curculio Dieckmanni Faust. (Coleoptera: Curculionidae)
Source: Front Physiol. 2022 May 9;13:896793. doi: 10.3389/fphys.2022.896793 (PMC9124802; doi:10.3389/fphys.2022.896793)
Supplement: Supplementary file 7 [file Table5.XLSX]

## Sheet: Sheet1
Table S7. Primer information used for the real-time quantitative PCR.
Primer name	Forward primer （5' to 3'）	Reverse primer （5' to 3'）
Reference gene
Actin	GTGTTATGGTGTCTAGTTGGT	GATGTTCAGTTCTGTCTGGTAT
EF1-a	GTATTCTCAAGCCTGGTA	GCATCTCAACAGACTTAAC
OBPs
CdieOBP1	GTACACGTCCGCCATTTTCT	ATAAACCGCAAAGCACCATC
CdieOBP2	GCAATGAACAGCCTCAGACA	CAGGAAGGCCAAACTGATGT
CdieOBP3	ATGGCCAACCTTCACAAGAC	GCAGTATTTCACCAGCAGCA
CdieOBP4	TCTCCAATTCTCCCGCTCTA	AAATGCACTTGATCCCCTCA
CdieOBP5	TGGAGCAAATGAGGATGACA	CGGATAATCGGTGTCGTTTT
CdieOBP6	GGGATGACTGAGGCACAAAT	ATCATTTTGACGGCGTTTTC
CdieOBP7	TGCTATATGTGGTGCGGACT	GCAAAGCATTTGTCATCGAA
CdieOBP8	CTCCAAAGGTCAAGGAGCAG	AGATGTTCCTCAGCGTGGTC
CdieOBP9	AGCTTCGACCACGTCAGAGT	CGAATTGTCTGACGAGCAAA
CdieOBP10	GCGCCAGTCAATTTTTCTTC	CAAAACCTGTATCGCCGAAT
CdieOBP11	TGAAACGGGAGTATCCGAAG	CTGCAATTGTTGCTTCCTCA
CdieOBP12	TCCTTAGGAGCCATGGAATG	AAACCATGCAAGGCGAATAC
CdieOBP13	TTCAAATGCTTCCTGCACTG	CCTCGTCCATCTTTTTCCAA
CdieOBP14	GGGAAGCATTTGTGCACTTT	ATGAAGGATCCAAACGCAAA
CdieOBP15	ATGGGGGATGCATTTAAACA	CAAGGGGAGAGATCGGTAAA
CdieOBP16	TTCTCATTGGGTTGGCTTTC	CTCCGTCTGGTTTCATCCAT
CdieOBP17	TTGCCTATGCAGAGCAACTG	CCGGTTCCTCAAAATGAAAA
CdieOBP18	TCTCCCGCTTTAAAGGATCA	CCGTAGGAGTTGCTTTTGGA
CdieOBP19	GCCTTGATCAATTGCTTGGT	GGCTCGTTCAGGAGACTTTG
CdieOBP20	CTCTCATGGCTACCGCTTTC	CTGAATCTGATCACCCACGA
CdieOBP21	GCAATTTCATGCCAGGATTT	GGGTAGTTTGGCTTCGATGA
CdieOBP22	TTGCCTTAGAATGCATGGAA	GCAGATCCGTTCCGTCATAA
CdieOBP23	TGCTTTCGCTTTGTTGTTTG	TGGCCTTGTTTCAGTTGTTG
CSPs
CdieCSP1	TTTGTCGTTGCATTTTGAGC	CGTATGTGCAGTGGTTTTGG
CdieCSP2	TTTTCTGCTTCCGTTTTGCT	GCTTTGGCTTATTGCAGACC
CdieCSP3	ATTGCAGACCAGGGCACTAC	TTCTGGAGAGCGTCAGGAAT
CdieCSP4	TGGAATAGCATTGTCGCAAG	TTGGCATTGGCTAATTGTTTC
CdieCSP5	TTCTTTTGAGCGGCAGTACA	TGAAGGAGTTGAAGCCAAGG
CdieCSP6	GACGACCAATACACGAGCAA	GCATTTATCGCAACCGTTTT
CdieCSP7	TGAAAGCACATCTGGCTGAC	GTAGGTTCCTTGGGGGTCAT
CdieCSP8	TAAGCCCCTCACAAAACCAC	CAGCACTAGATCACCCAGCA
CdieCSP9	GGGTTATCTAGTGCCGACGA	AAGGCGTCGGGTAAGTTTCT
CdieCSP10	TACGACAACGTCGATTTGGA	TTTCCTGCTGCCTTTCTGTT
CdieCSP11	GCACCCCAGATGGTTTAGAG	TGATTTGTCGACAGGTTCCA
CdieCSP12	TCTGACGAAGCACTCGAAAA	AGCCAGCACTTTCTTGATTTG
CdieCSP13	TCCATCCTTTTTCACCGAAG	TCCGATTGGAAAGGATCTTG
CdieCSP14	TCCAATTTCTCCCACCAGTC	CCGTGCCCTAAAGAAACTGA
CdieCSP15	ATTTTGCAGAGCGACAGGTT	TCGATGAGGAAATGGAGGAC
SNMP
CdieSNMP1	GGGTGTGCGTTCTTTTTCAT	CGTAACAAAACGGTCCGACT
CdieSNMP2	TGGCACAGAACAATGGGATA	GTCTTCGTCTGCATCGTCAA
ORs
CdieOR1	GCATTTTGGATTGGCTGACT	TGTCCTCGCTTCCGTATTTT
CdieOR2	ATAGAGGCGATGGAGGAAGC	TCAAATGCCTCCCCTCTCTA
CdieOR3	TAGCAAGATGGCCCTTCATC	TGAGCGGGTAGGTTACGTTT
CdieOR4	GCAGCAGCTGAAGAAGGAAT	TTGCGAGTGGATGATAGCTG
CdieOR5	CGTCACCATGACGTATAGGC	TGGTGTTTTAGATCGTAGCATCA
CdieOR6	GTGCGTTGATGGTGTTTGAC	GCCAAGCCTTGACTCAAAAG
CdieOR7	GGGTGCTTTAGCCACAATTC	ATCCCAACCCCATACGACTT
CdieOR8	GCCAAAAGGTCCGATATTGA	TTTCCTCCTTTACGCCATTG
CdieOR9	ACGCTTGCTTTTCAGCTTGT	ACGGAGCCATGAACGTAATC
CdieOR10	ATAAGCCACCCAAGCAAATG	CTCAGAATGCAACCAAAGCA
CdieOR11	GCAGCTGTATCATCGTCCAA	TGGCCCTATACCGTTTACCA
CdieOR12	ACCCGACACACCTACGAAAG	GGCCTGGGGAAATTTTACAT
CdieOR13	AGGCTTAAATGGCAGCTTGA	TGGCTACGTATGGACAACCA
CdieOR14	ACCCGACAATTTTGAACTGG	GCAATATGGCCCTCAGAAGA
CdieOR15	GGCATTTGGAATCAGGCTAA	TCGCCCACAAAAGTTATTCC
IRs
CdieIR1	TCGTTTCCAACCAGGTTTTC	CTCGACTCAAGGCCTAAACG
CdieIR2	GACAGCTATAACGTGTCAGATGG	TTCTCGGTATTCGATTGAAGC
CdieIR3	AAACCCGGAAAAGAAGCAAT	GGTTTTACGTGTGCTTCGGTA
CdieIR4	AAGTTGCTGCACTTTGCTGA	CGATCAGTTTGGTTGTGCTT
CdieIR5	GGAAGTGCATGCAGGTTTTC	AACATTCCAAGAAGCCGAGA
CdieIR6	CGTTGTTGGACAGGTTCCTT	TTCCAAATACTCCTGCGACA
CdieIR7	CACCCAATCCATTCCAAAAC	ACTACCGTCGTGCATTTTCC
CdieIR8	CACAAGGCTGCGATCTGTTA	AGTTTGGGCCGCTAAATCTT
CdieIR9	TTCATGTGGACGTTTCCGTA	TGGGCCTGCTATAACCATTC
CdieIR10	CCTTGCAGGGAGTTCACATT	TGCCTGCATTCGTTCTACAG
CdieIR11	CCAAACATGCCATCACTGAC	GAACATGGCAAGCTGGATTT
CdieIR12	GCTGGAATGTTGTCCGAGAT	ATGCCTTGGTCCAAAAACTG
CdieIR13	GATCGTCCCGACACATTCTT	GATGTGGCCGTAGCATTCTT
CdieIR14	TAAGTGATTCGGCCTGTTCC	TGGCCTGAAAGTGTATGCTG
CdieIR15	ATGCGGGAAAGCCTAAAAAT	TCGTGGCATTGACTATACGC
CdieIR16	CGAACGGGCATAAACAAAGT	CGAGTTTCGATTTTGTCACCT
CdieIR17	GCGGGAAGGGAAAAAGTAAG	AACGTCCGCTTTGTAAATGG
CdieIR18	TTGTGCAGGTCTCTCCAGTG	AGGCAACTACGCTTTCCTCA
CdieIR19	CGGTTTCGCTCTTTTCTCAC	CTGGCCAATGTAGGTGGAGT
CdieIR20	ACTCCGCTGCCTATTTCTCA	AAACCCTCAAATGCGAACTG
CdieIR21	CTCAGCCAACCCATCTCAAT	ATAATCCAATCCGCCACTTG
CdieIR22	CGTCTTCTTCTGTGCCATCA	CTGGAGAAAAAGCCTTCACG
CdieIR23	ACATGGGTTTGGGTGATGTT	TATCGGAGCCAATTCTGACC
GRs
CdieGR1	CTTCGAAGAAGCGGTAATCG	GTGAGGACGAGTGGTTTGGT
CdieGR2	AAGAAGCCCCCAATTCACTT	ACAGCCGAAAGCCTACAAGA
CdieGR3	TCGTAACCCCTGAGCACTCT	TTAGCTAACGTCCGGGAAGA
CdieGR4	TCTTCCAAATGCAAGCCTTC	CCGGATCTTAGACCCTGTGA
CdieGR5	CTACTGATCCGCTGCAAACA	ACGTCCTGAACAACGGAATC
CdieGR6	TGGCCTATCCAGAACTCCAC	TTTGGGCCGAAAACTAACAC
CdieGR7	ATCTCGATGAGGTGCCATTC	TGCAGTTCGTTTGTTTTTGC
CdieGR8	TGAATACCGAGCCGAAAATC	AGTCGACAGGGACATGGAAC
CdieGR9	ATGTATCCATCAGGGCTTGC	AGCAGCAAATTTGGCTCAGT
